# Supplementary material for: Circularly polarized luminescence of natural products lycorine and narciclasine: role of excited-state intramolecular proton-transfer and test of pH sensitivity
Source: Royal Society of Chemistry journal article supplement (doi:10.1039/d3cp02600k), 2023-01-01
Supplement: d3cp02600k1.pdf [file d3cp02600k1.pdf]

## Electronic Supplementary Information

# Circularly Polarized Luminescence of Natural Products Lycorine and Narciclasine: Role of Excited-State Intramolecular Proton-Transfer and Test of pH Sensitivity

Giuseppe Mazzeo, Marco Fusè, Antonio Evidente, Sergio Abbate and Giovanna Longhi

## Table of Contents

|                                                                      |    |
|----------------------------------------------------------------------|----|
| NMR data for compounds <b>1-4</b> .....                              | 2  |
| Additional Spectra of Narciclasine Derivatives.....                  | 6  |
| Narciclasine Derivatives under different pH conditions.....          | 11 |
| Lycorine DFT Parameters.....                                         | 13 |
| Narciclasine DFT Parameters.....                                     | 14 |
| Simulated ECD Spectra of Narciclasine Most Populated Conformers..... | 16 |
| Narciclasine Derivatives' Parameters.....                            | 17 |
| Narciclasine Frontier Orbitals.....                                  | 18 |
| Experimental and Simulated Spectra of Lycorine .....                 | 19 |
| Template DFT Parameters.....                                         | 20 |
| Anionic Narciclasine DFT Parameters.....                             | 22 |
| Simulated Spectra of Anionic Narciclasine .....                      | 24 |
| Geometries in XYZ format .....                                       | 27 |

## NMR data for compounds 1-4

### **<sup>1</sup>H and <sup>13</sup>C NMR and EI MS data of Lycorine**

<sup>1</sup>H NMR (400 MHz, CDCl<sub>3</sub>-CD<sub>3</sub>COOD, 3:1 v/v): δ 6.98 (s, H-12), 6.80 (s, H-8), 5.95 (s, H<sub>2</sub>-11), 5.77 (br s, H-3), 4.58 (br s, H-1), 4.48 and 4.19 (1H each, d, J=14.0 Hz, H<sub>2</sub>-7), 4.26 (m, H-2), 3.95 (d, J=11.8 Hz, H-12c), 3.75 and 3.49 (1H each, m, H<sub>2</sub>-5), 2.99 (d, J=11.8 Hz, H-12b), 2.88 (m, H<sub>2</sub>-4). <sup>13</sup>C NMR (100 MHz, CDCl<sub>3</sub>-CD<sub>3</sub>COOD, 3:1 v/v): δ 149.6 (C-9), 148.1 (C-10), 137.9 (C-3a), 130.7 (C-7a), 125.7 (C-12a), 122.9 (C-3), 108.8 (C-8), 106.4 (C-12), 102.8 (C-11), 71.9 (C-2), 70.1 (C-1), 61.8 (C-12c), 55.1 (C-5), 54.2 (C-7), 38.2 (C-12b), 30.3 (C4).. EI MS, m/z: 287 [M]<sup>+</sup>, 286, 268, 252, 250, 227, 226.

### **<sup>1</sup>H and <sup>13</sup>C NMR and EI MS data of Narciclasine**

<sup>1</sup>H NMR (400 MHz, CD<sub>3</sub>SOCD<sub>3</sub>): δ 13.24 (s, HO-7), 7.88 (s, HN-5), 6.83 (s, H-10), 6.15 (ddd, J=4.9, 1.0 and 2.4 Hz, H-1), 6.09 (d, J=1.2 Hz, H-11A), 6.08 (d, J=1.2 Hz, H-11B), 4.18 (ddd, J=(8.5, 2.4 and 1.2 Hz, H-4a), 4.01 (ddd, J=4.9, 2.4 and 1.2 Hz, H-2), 3.78 (dd, J=8.5 and 2.4 Hz, H-4), 3.69 (ddd, J=2.4, 2.4 and 1.2 Hz, H-3); <sup>13</sup>C NMR (100 MHz, CD<sub>3</sub>SOCD<sub>3</sub>): δ 172 (C-6), 169.8 (C-7), 152.3 (C-8), 144.8 (C-9), 133.3 (C-10b) 132.1 (C-10a), 129.2 (C-6a), 124.7 (C-1) 102.0 (c-11), 95.7 (C-10), 72.3 (C-3), 69.1 (C-2), 68.8 (C-4), 52.8 (C-4a); EI MS, m/z: 307 [M]<sup>+</sup>, 289, 271.

**Table S1** <sup>1</sup>H and <sup>13</sup>C NMR data of Tri- and Tetra-acetylnarciclasine (**3** and **4**) recorded in CDCl<sub>3</sub> at 400 and 100 MHz, respectively. The chemical shifts are in δ values (ppm) from TMS<sup>a</sup>

| Carbon number           | <b>3</b>               |                      | <b>4</b>               |                      |
|-------------------------|------------------------|----------------------|------------------------|----------------------|
|                         | δH (J in Hz)           | δC                   | δH (J in Hz)           | δC                   |
| 1                       | 6.18 m                 | 118.2 d              | 6.18 m                 | 118.2 d              |
| 2                       | 5.49 br t (4.0)        | 68.5 d               | 5.46 br t (4.0)        | 68.3 d               |
| 3                       | 5.37 m                 | 71.4 d               | 5.37 m                 | 71.4 d               |
| 4                       | 5.25 dd (12.0 and 4.0) | 67.9                 | 5.24 dd (12.0 and 4.0) | 68.1 d               |
| 4a                      | 4.65 br d (12.0)       | 50.3 d               | 4.61 d (12.0)          | 50.2 d               |
| 6                       |                        | 170.3 s <sup>b</sup> |                        | 170.5 s <sup>d</sup> |
| 6a                      |                        | 130.5 s              |                        | 131.7 s              |
| 7                       |                        | 170.3 s <sup>b</sup> |                        | 162.3 s              |
| 8                       |                        | 153.1 s              |                        | 152.5 s              |
| 9                       |                        | 145.9 s              |                        | 141.6                |
| 10                      | 6.68 s                 | 96.6 d               | 6.95 s                 | 102.0 d              |
| 10a                     |                        | 133.2 s              |                        | 133.8 s              |
| 10b                     |                        | 135.3 s              |                        | 134.2 s              |
| 11A                     | 6.11 br s              | 102.6 t              | 6.14 br s              | 103.1 t              |
| 11B                     | 6.10 br s              |                      | 6.11 br s              |                      |
| <u>CH<sub>3</sub>CO</u> | 2.16 s                 | 20.9 q <sup>c</sup>  | 2.40 s                 | 20.9 q <sup>e</sup>  |
| <u>CH<sub>3</sub>CO</u> | 2.15 s                 | 20.9 q <sup>c</sup>  | 2.15 s                 | 20.9 q <sup>e</sup>  |
| <u>CH<sub>3</sub>CO</u> | 2.13 s                 | 20.8 q               | 2.13 s                 | 20.8 q               |
| <u>CH<sub>3</sub>CO</u> |                        |                      | 2.11 s                 | 20.7 q               |
| <u>CH<sub>3</sub>CO</u> |                        | 169.7 s              |                        | 170.5 s <sup>d</sup> |
| <u>CH<sub>3</sub>CO</u> |                        | 169.5 s              |                        | 169.7 s              |
| <u>CH<sub>3</sub>CO</u> |                        | 168.9 s              |                        | 169.5 s              |
| <u>CH<sub>3</sub>CO</u> |                        |                      |                        | 169.1 s              |
| HN-5                    | 6.01 br s              |                      | 5.96 br s              |                      |
| HO-7                    | 12.46 s                |                      |                        |                      |

<sup>a</sup>The assignments were made in accordance with the value previously reported for narciclasine<sup>37</sup>

<sup>b,c,d,e</sup>These signals are overlapped

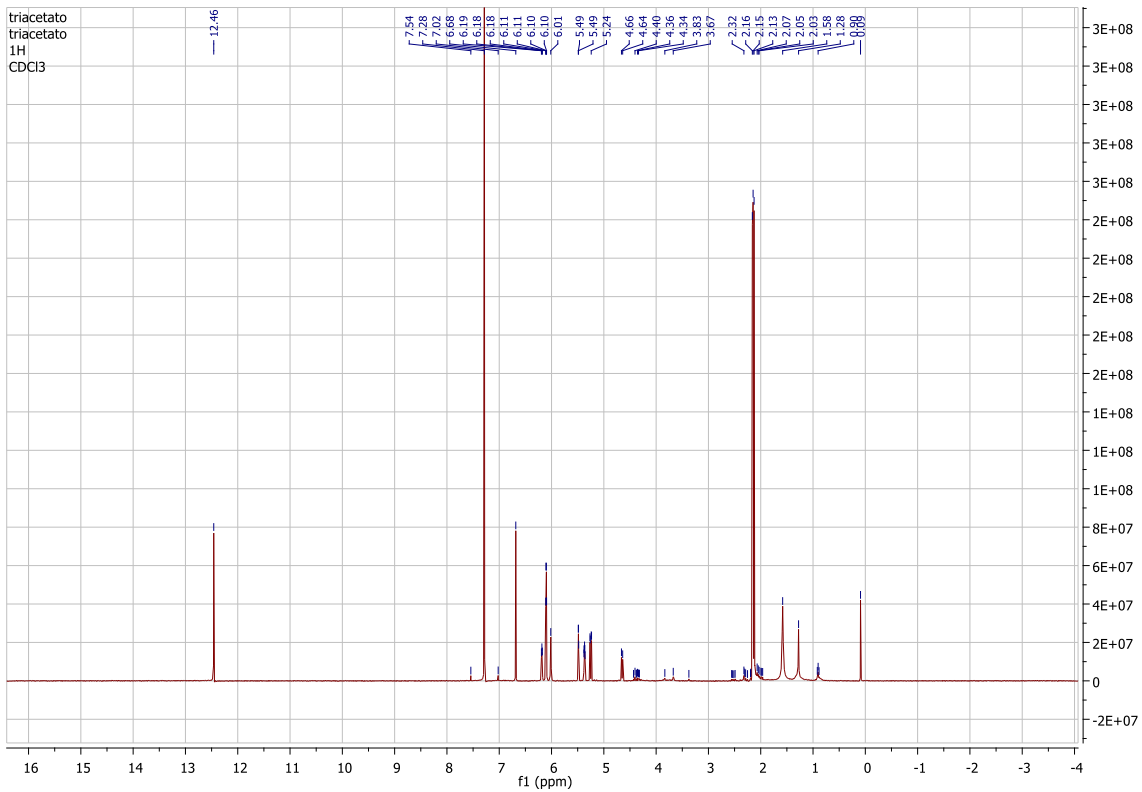

**Fig. S1.**  $^1\text{H}$  NMR spectra of triacetylnarciclasine **3**

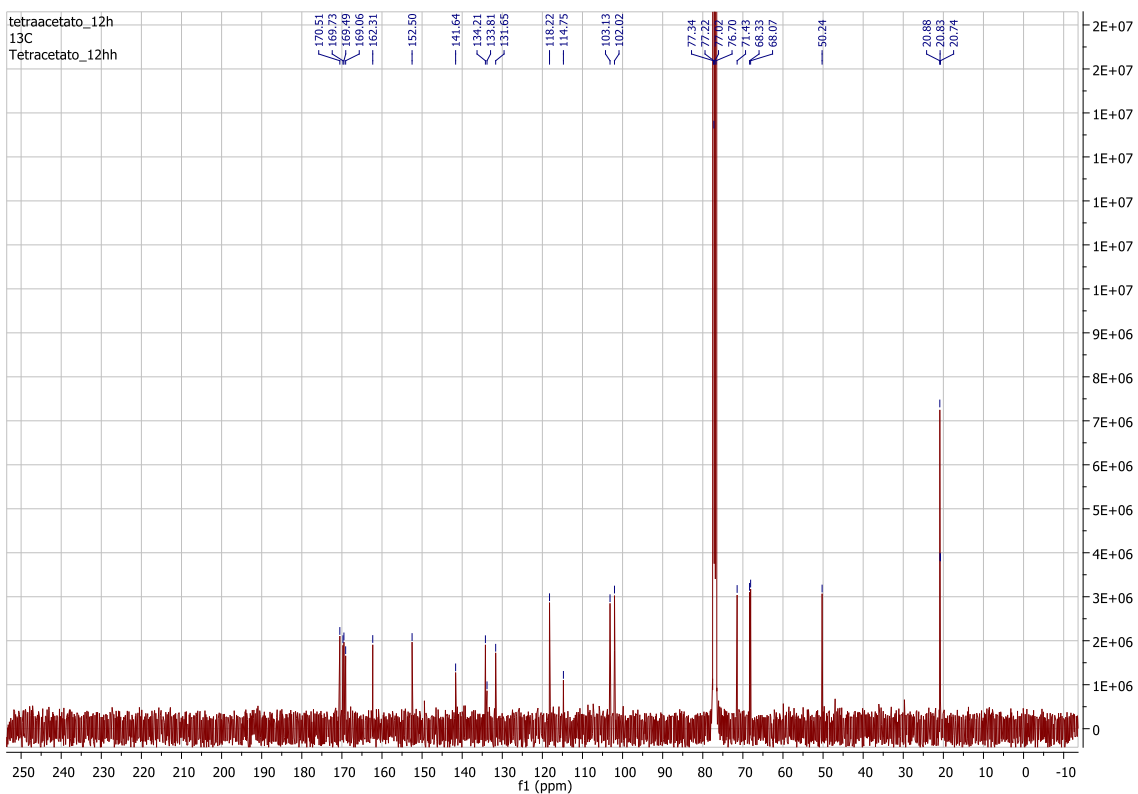

**Fig. S2.**  $^{13}\text{C}$  NMR spectra of triacetylnarciclasine **3**

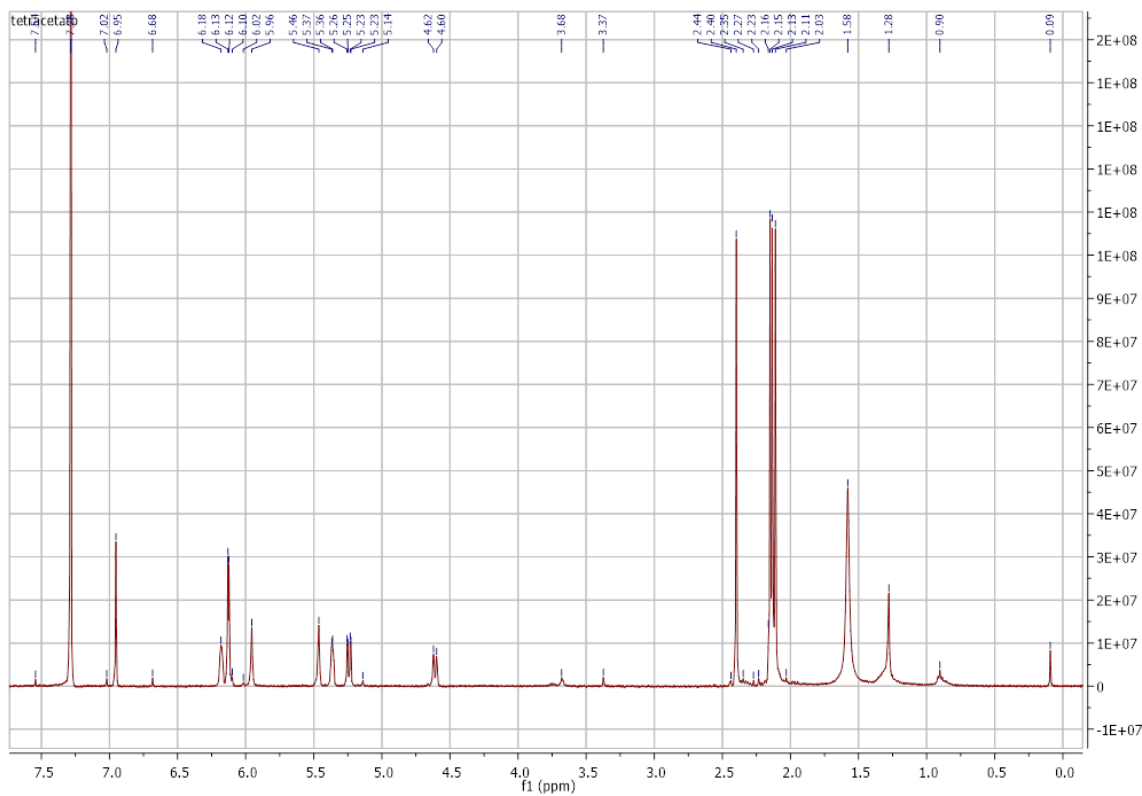

**Fig. S3.**  $^1\text{H}$  NMR spectra of tetracetylnarciclasine **4**

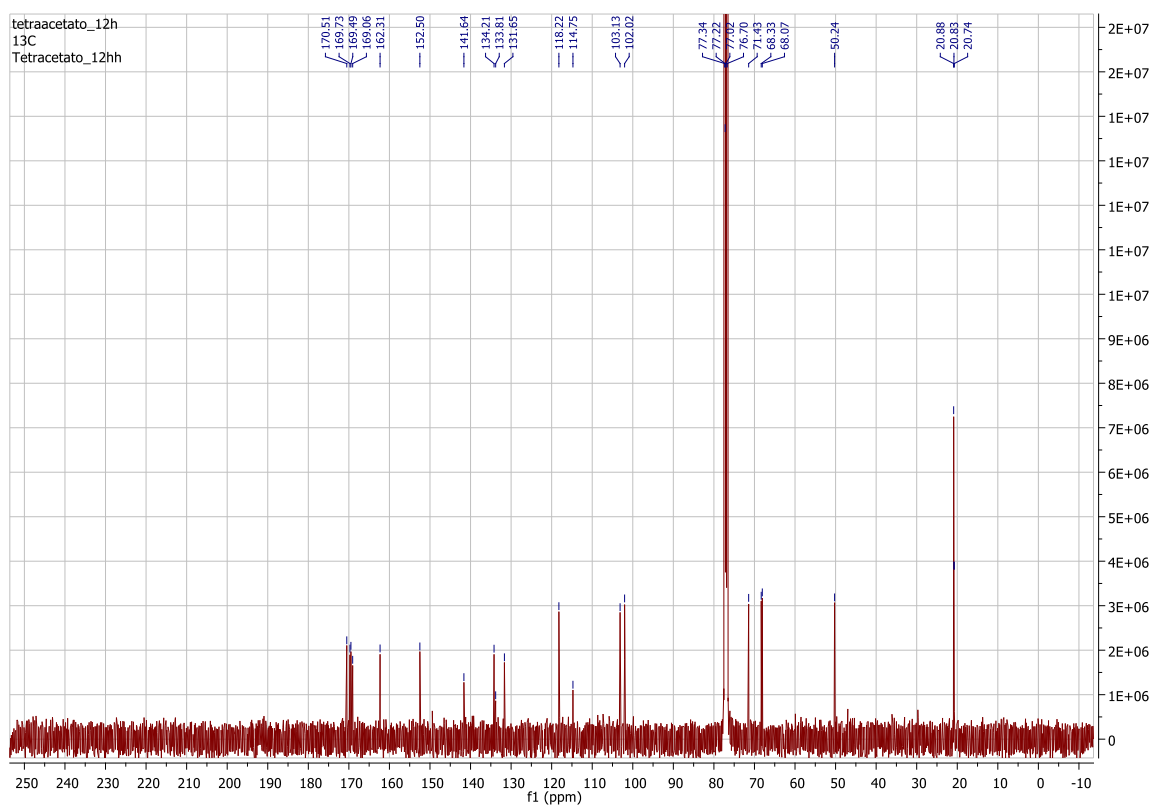

**Fig. S4.**  $^{13}\text{C}$  NMR spectra of tetracetylnarciclasine **4**

## Additional Spectra of Narciclasine Derivatives

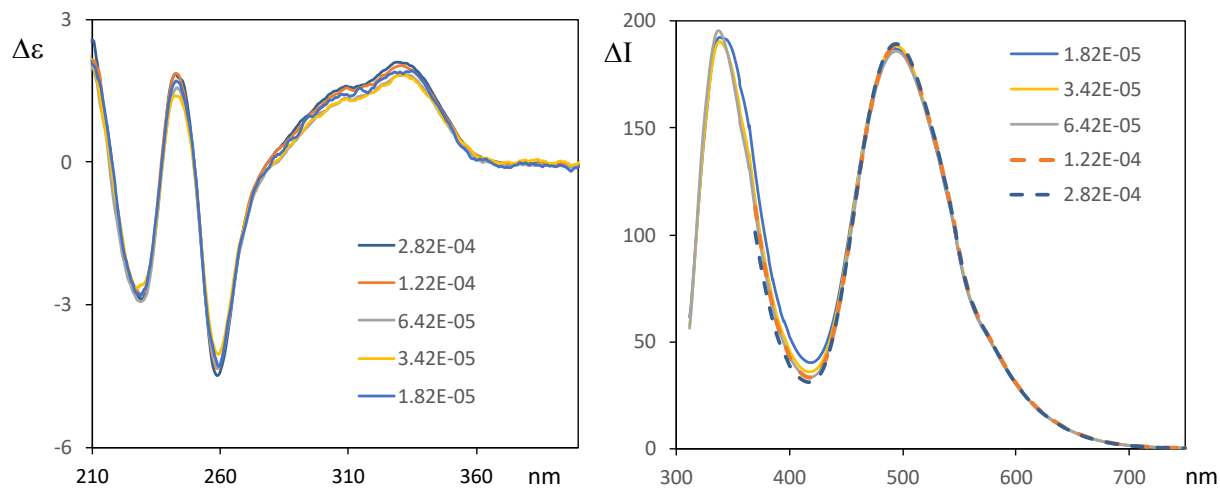

**Fig. S5.** CD (left), fluorescence (right) experimental spectra of narciclasine **2** at different concentrations. Fluorescence spectra were corrected for autoabsorption, i.e. dividing by transmittance (see ref. 56 in the text). Since, when considering highly concentrated solutions, transmittance is nearly zero, for the two most concentrated solutions data were not corrected and are reported only down to 370 nm.

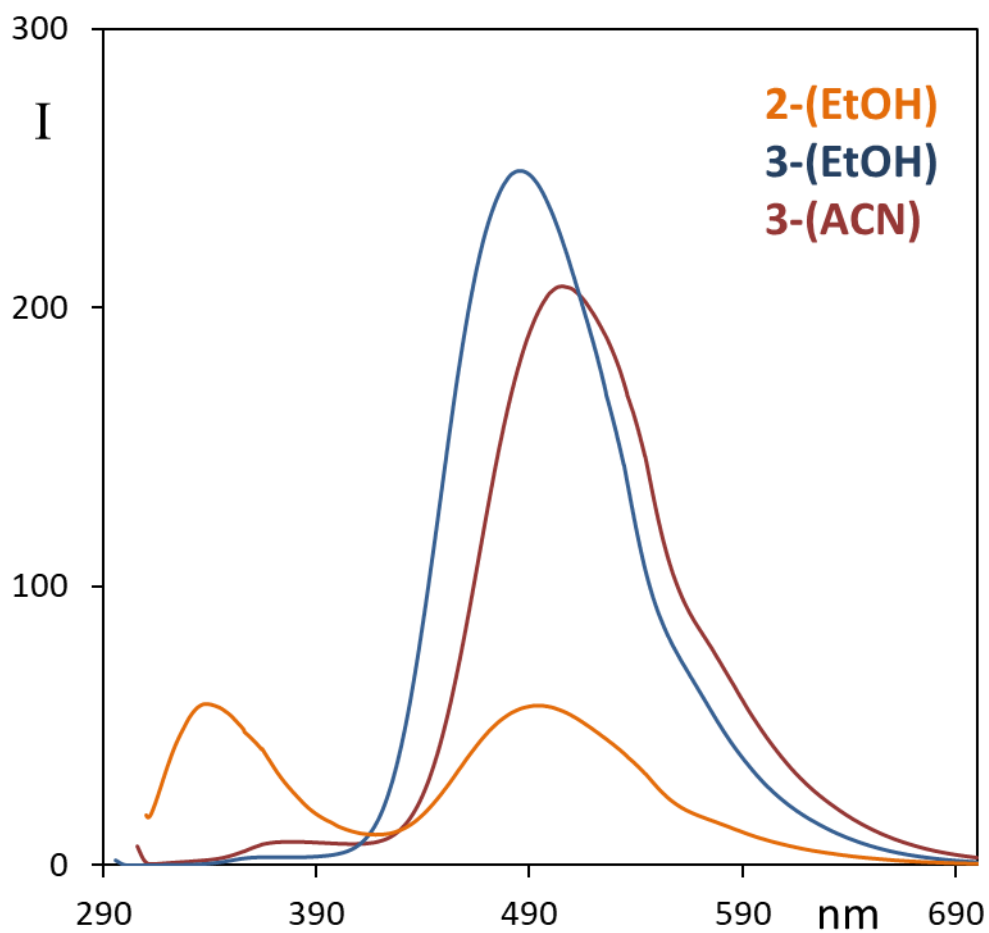

**Fig. S6.** Comparison of experimental fluorescence spectra of narciclasine **2** in ethanol solution (orange line) and of triacetylnarciclasine **3** in acetonitrile (dark red line) and in ethanol (blue line) solutions. Excitation wavelengths: 300 nm.

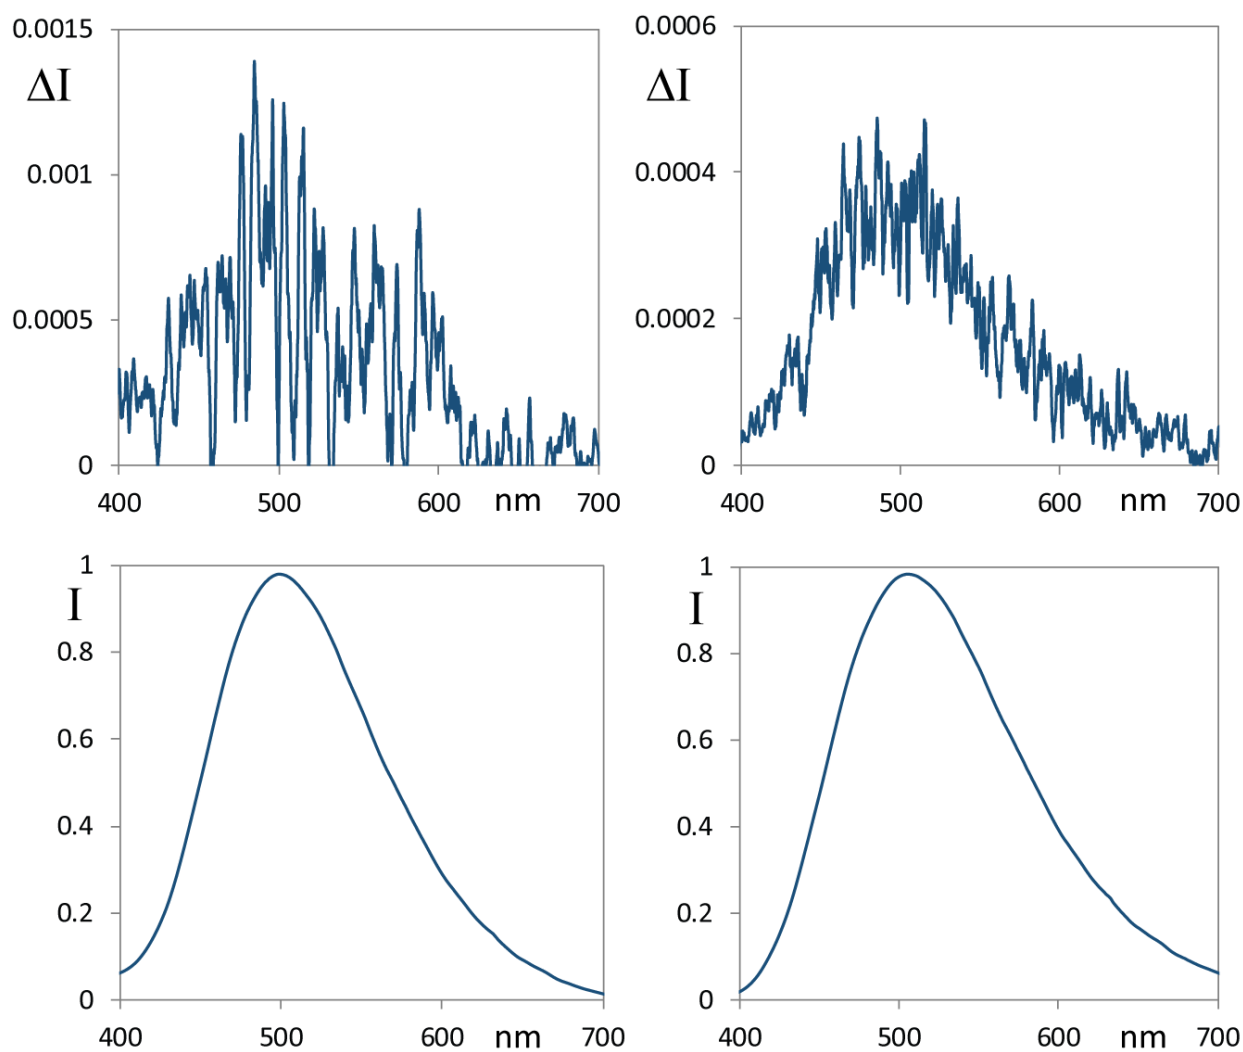

**Fig. S7.** CPL (top) and fluorescence (bottom) spectra in DMSO solution of narciclasine **2** (ca.  $10^{-5}$  M, left) and triacetylnarciclasine **3** (ca.  $10^{-4}$  M, right). Excitation wavelength: 300 nm.



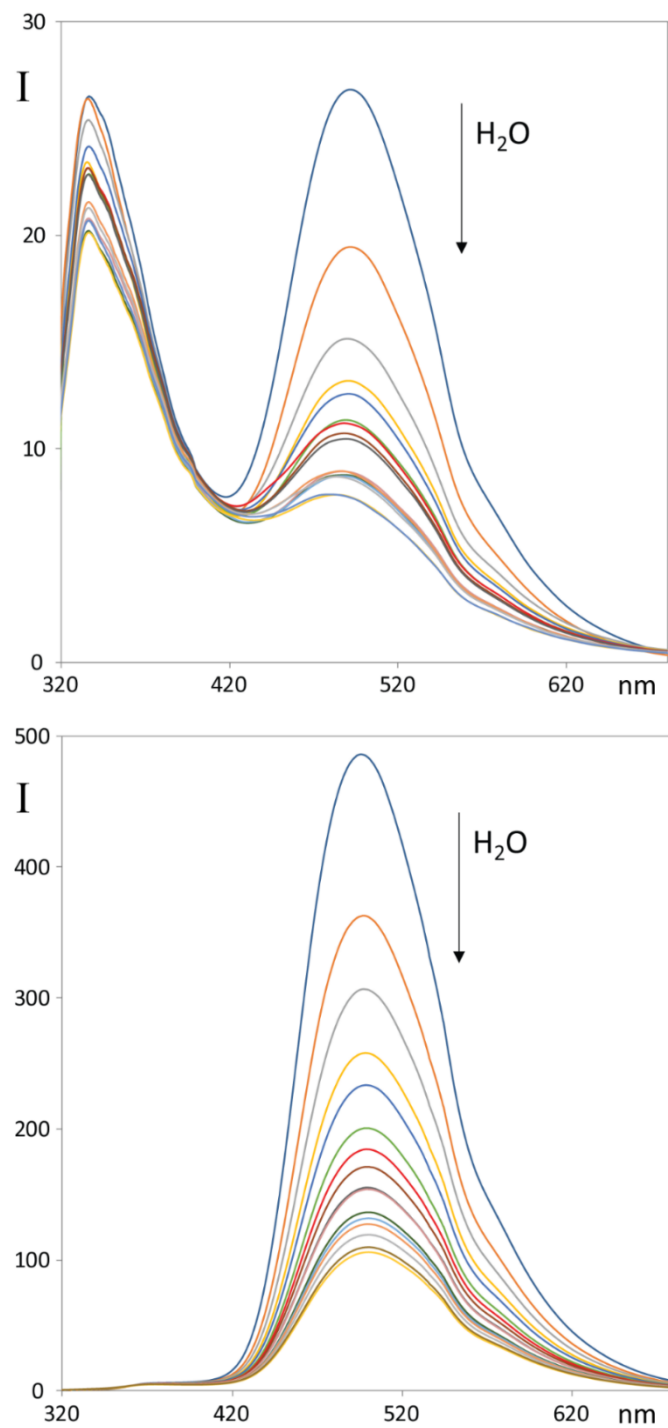

**Fig. S8.** Fluorescence experimental in mixed EtOH/H<sub>2</sub>O solution, from 15:1 to a 1:1 ratio v/v for narciclasine **2** (top) and triacetylnarciclasine **3** (bottom). Correction for auto-absorption has been applied. Excitation wavelength: 300 nm.

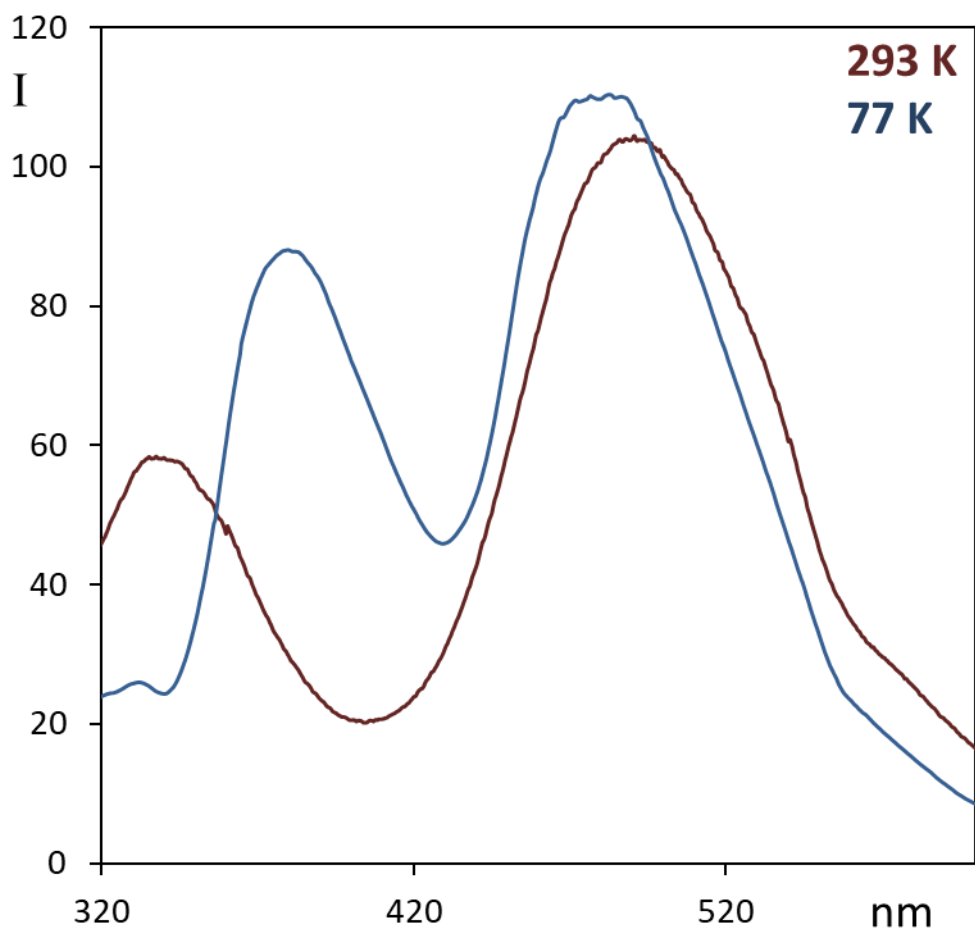

**Fig. S9.** Room temperature (red) and liquid-N<sub>2</sub> temperature (blue) fluorescence spectra of narciclasine **2** in solution. Solvent used: EPA (ether, isopentane, ethanol, 5:5:2, by volume). Excitation wavelength: 300 nm. Concentration is ca.  $5 \cdot 10^{-5}$  M.

## Narciclasine Derivatives under different pH conditions

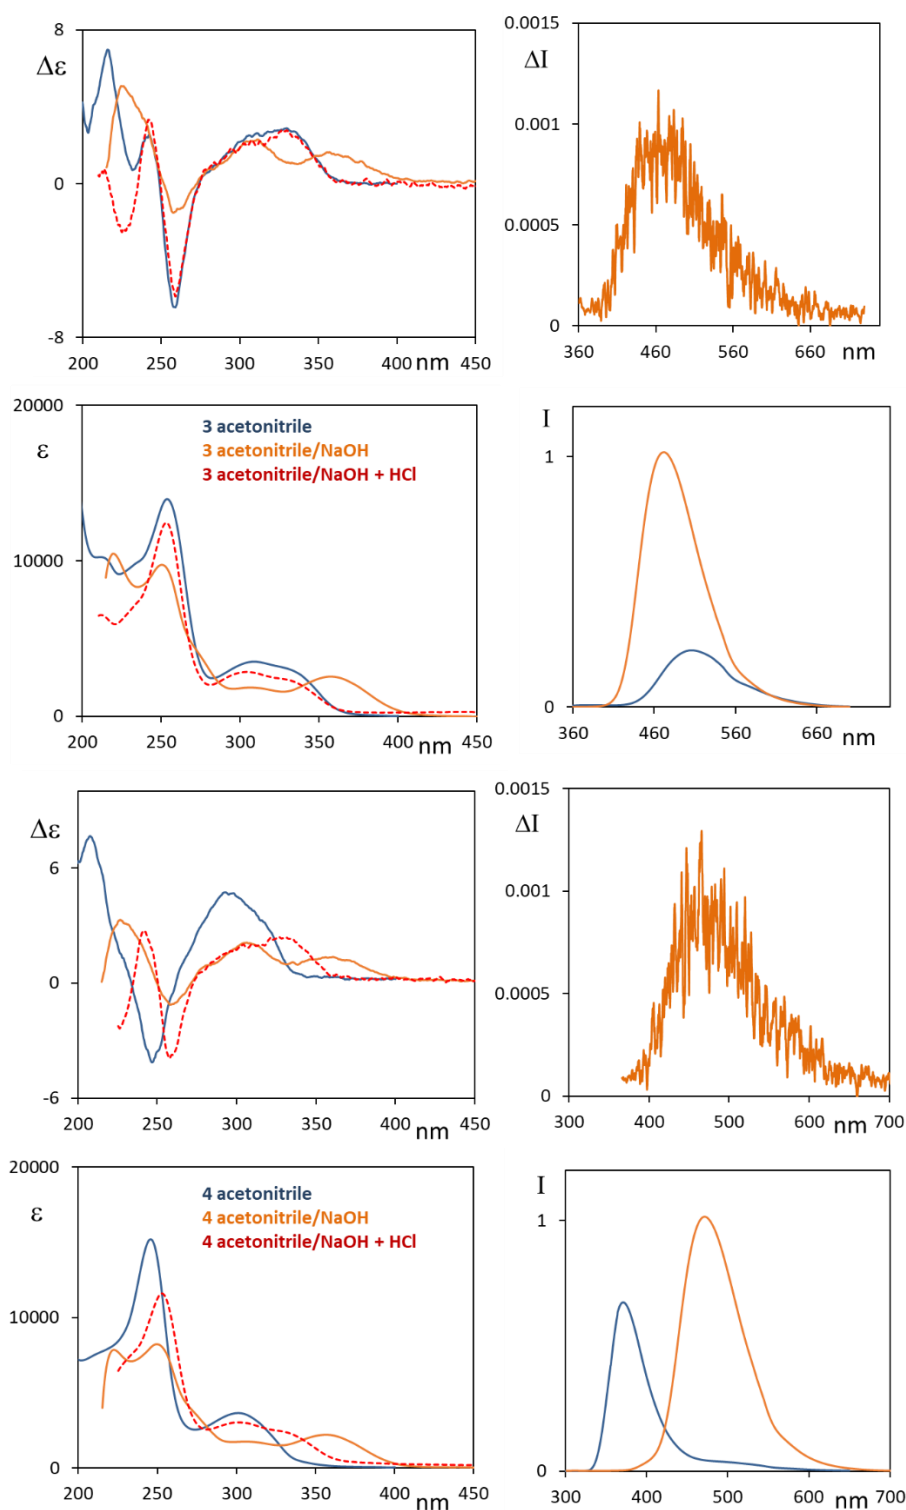

**Fig. S10.** Panels in the top two lines: triacetylnarciclasine **3**. Panels in the bottom two lines: tetraacetylnarciclasine **4**. In the left panels are reported the CD (top) and UV (bottom) spectra in different conditions: acetonitrile solution (solid blue line), NaOH-water solution (acetonitrile:water 1:10, 10mM NaOH) (solid orange line) and same solution with addition of one drop of HCl 1N. Right panels: CPL spectra in NaOH-water solution and fluorescence spectra in acetonitrile (blue) and NaOH-water solution (orange trace). Excitation wavelength for emission spectra: 290 nm for **3** and 280 nm for **4**.

## Narciclasine Derivatives Deprotonation Scheme

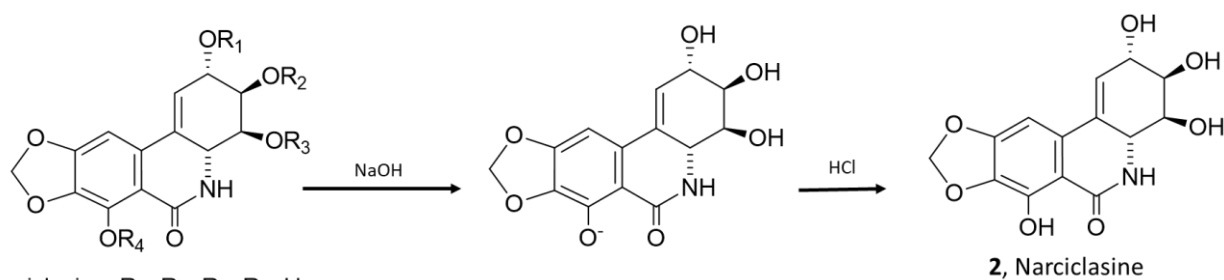

**2**, Narciclasine,  $R_1=R_2=R_3=R_4=H$

**3**, Triacetylnarciclasine,  $R_1=R_2=R_3=Ac$ ,  $R_4=H$

**4**, Tetraacetylnarciclasine,  $R_1=R_2=R_3=R_4=Ac$

**Scheme S1.** Proposed deprotonation scheme of narciclasine **2**, triacetylnarciclasine **3** and tetraacetylnarciclasine **4** with addition of  $NaOH$  and (re)protonation scheme with addition of  $HCl$ .

## Lycorine DFT Parameters

**Table S2.** Relevant geometrical parameters and first electronic transition of lycorine **1** ground state conformers (see Fig. S11 for the rings numbering used in Cremer-Pople (CP) parameter definitions). Reported data:  $\Delta E$  energy differences from the lowest lying conformer in kJ/mol; first transition energies (eV) and wavelengths (nm); oscillator strengths (dimensionless) and rotational strength ( $10^{-40}$  esu<sup>2</sup>cm<sup>2</sup>); angle between EDTM and MDTM ( $^{\circ}$ ). With the exception of dioxolane ring  $\varphi 1$ , the polycyclic backbone is quite rigid with the following CP parameters shared among all the conformers:  $q1 \approx 0.22$ ,  $Q3 \approx 0.53$ ,  $\theta 3 \approx 132$ ,  $\phi 3 \approx -140$ ,  $Q4 \approx 0.55$ ,  $\theta 4 \approx 130$ ,  $\phi 4 \approx -68$ ,  $q5 \approx 0.40$ ,  $\varphi 5 \approx 0$ .

|   | $\Delta E$<br>(kJ/mol) | eV   | nm  | f    | R     | E_M | $\varphi 1$ | $\tau 1$ | $\tau 2$ |
|---|------------------------|------|-----|------|-------|-----|-------------|----------|----------|
| 1 | 0.00                   | 4.93 | 252 | 0.14 | -10.8 | 98  | 36          | -45      | 175      |
| 2 | 0.08                   | 4.93 | 252 | 0.14 | -10.8 | 98  | -144        | -45      | 175      |
| 3 | 1.63                   | 4.93 | 252 | 0.14 | -11.4 | 98  | 36          | 164      | 174      |
| 4 | 1.74                   | 4.93 | 252 | 0.14 | -11.4 | 98  | -144        | 164      | 174      |
| 5 | 1.78                   | 4.95 | 251 | 0.14 | -6.3  | 94  | 36          | -44      | -67      |
| 6 | 1.83                   | 4.95 | 251 | 0.14 | -6.3  | 94  | -144        | -44      | -67      |

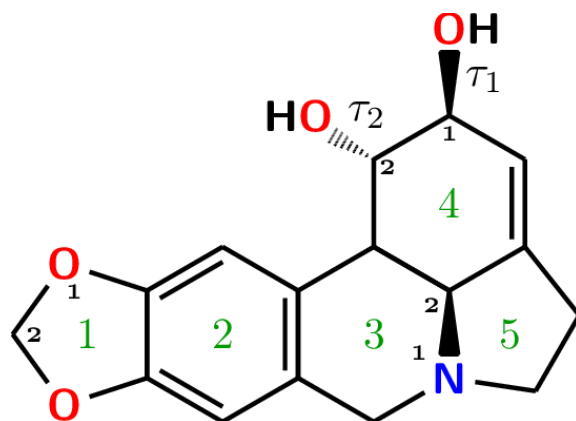

**Fig. S11.** Numbering of cycle moieties and atoms for lycorine **1** employed in Table S1.

## Narciclasine DFT Parameters

**Table S3.** Relevant geometrical parameters and first electronic transition for most populated conformers 1-8 of neutral narciclasine **2** in its ground state S0, structures marked x have too high energy values and are reported just for sake of completeness. Excited state S1 has been optimized starting from the lowest energy conformers. Reported data are:  $\Delta E$  energy differences from the lowest lying conformer in kJ/mol; first transition energies (eV) and wavelengths (nm); oscillator strengths (dimensionless) and rotational strength ( $10^{-40}$  esu<sup>2</sup>cm<sup>2</sup>); angle between EDTM and MDTM ( $^\circ$ ); geometrical parameters  $\varphi 1$  (dioxolane envelope);  $\vartheta 4$  and  $\varphi 4$  (Cremer-Pople parameters defining cyclohexene ring);  $\tau 2$ ,  $\tau 3$  and  $\tau 4$  defining the hydroxyl orientations stemming from cyclohexene (see Fig. S12 for the rings numbering used in CP definitions).

| S0 | $\Delta E$<br>(kJ/mol) | eV   | nm  | f    | R    | E_M | $\varphi 1$ | $\vartheta 4$ | $\varphi 4$ | $\tau 2$ | $\tau 3$ | $\tau 4$ |
|----|------------------------|------|-----|------|------|-----|-------------|---------------|-------------|----------|----------|----------|
| 1  | 0.00                   | 4.33 | 286 | 0.22 | 31.9 | 81  | -143        | 131           | -79         | -75      | 163      | 83       |
| 2  | 0.00                   | 4.35 | 285 | 0.21 | 31.8 | 82  | -143        | 130           | -79         | -74      | 164      | -74      |
| 3  | 0.11                   | 4.33 | 287 | 0.23 | 53.6 | 75  | 38          | 131           | -79         | -75      | 163      | 83       |
| 4  | 0.13                   | 4.34 | 286 | 0.22 | 53.3 | 76  | 38          | 130           | -79         | -74      | 164      | -75      |
| 5  | 0.66                   | 4.34 | 285 | 0.21 | 31.0 | 82  | -143        | 130           | -80         | 161      | 52       | -75      |
| 6  | 0.79                   | 4.34 | 286 | 0.21 | 52.3 | 76  | 38          | 130           | -79         | 161      | 52       | -75      |
| 7  | 1.94                   | 4.34 | 286 | 0.21 | 32.8 | 81  | -143        | 130           | -81         | 161      | 52       | 175      |
| 8  | 2.04                   | 4.33 | 286 | 0.22 | 54.0 | 75  | 38          | 130           | -81         | 162      | 52       | 175      |
| x  | 6.26                   | 4.38 | 283 | 0.17 | 53.3 | 75  | 38          | 55            | 61          | -170     | -168     | -159     |
| x  | 6.30                   | 4.38 | 283 | 0.17 | 32.5 | 81  | -143        | 55            | 61          | -170     | -168     | -159     |
| S1 | <i>Excited state</i>   |      |     |      |      |     |             |               |             |          |          |          |
| T  | 0.00                   | 2.72 | 456 | 0.32 | 11.6 | 87  | -152        | 132           | -77         | -76      | 163      | 86       |
| T  | 0.09                   | 2.72 | 455 | 0.32 | 24.5 | 84  | 35          | 132           | -77         | -76      | 163      | 86       |
| N  | 19.15                  | 3.33 | 372 | 0.46 | 33.9 | 82  | 37          | 132           | -72         | -76      | 162      | 86       |
| N  | 19.18                  | 3.33 | 372 | 0.45 | 23.9 | 84  | -155        | 132           | -72         | -76      | 161      | 86       |

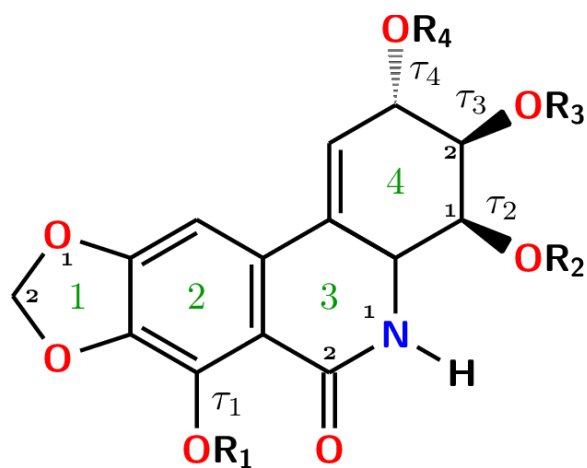

**Fig. S12.** Numbering of cycle moieties and atoms for narciclasine **2** employed in Table S2 and throughout the work.

## Simulated ECD Spectra of Narciclasine Most Populated Conformers

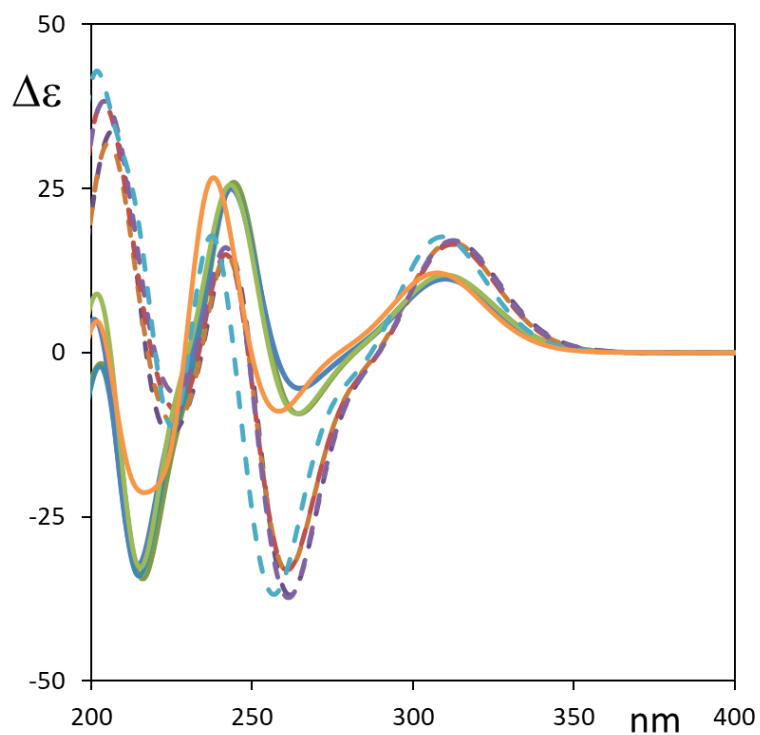

**Fig. S13.** Calculated CD spectra for the most populated conformers of narciclasine **2** in neutral form. Solid lines relative to  $\varphi_1 = -143^\circ$ , dashed line  $\varphi_1 = 38^\circ$ . Populated conformers correspond to  $\theta_4 \approx 130^\circ$   $\varphi_4 \approx -80^\circ$  half chair, two spectra have been reported also for the opposite half chair (orange line and dashed light blue) for sake of comparison. All spectra have been red shifted by 25 nm for better comparison with experimental data.



## Narciclasine Derivatives' Parameters

**Table S4.** Relevant geometrical parameters and first electronic transition for most populated conformers of neutral triacetylnarciclasine **3**. Reported data are:  $\Delta E$  energy differences from the lowest lying conformer in kJ/mol; first transition energies (eV) and wavelengths (nm); oscillator strengths (dimensionless) and rotational strength ( $10^{-40}$  esu<sup>2</sup>cm<sup>2</sup>); angle between EDTM and MDTM ( $^{\circ}$ ); geometrical parameters  $\varphi 1$  (dioxolane envelope);  $\vartheta 4$  and  $\varphi 4$  (Cremer-Pople parameters defining cyclohexene ring);  $\tau 2$ ,  $\tau 3$  and  $\tau 4$  defining the hydroxyl orientations stemming from cyclohexene (see Fig. S12 for the rings numbering used in CP definitions).

|   | $\Delta E$<br>(kJ/mol) | eV   | nm  | f    | R    | $E\_M$ | $\varphi 1$ | $\vartheta 4$ | $\varphi 4$ | $\tau 2$ | $\tau 3$ | $\tau 4$ |
|---|------------------------|------|-----|------|------|--------|-------------|---------------|-------------|----------|----------|----------|
| 1 | 0.00                   | 4.32 | 287 | 0.24 | 33.5 | 84     | -143        | 129           | -79         | 166      | 93       | -80      |
| 2 | 0.14                   | 4.32 | 287 | 0.24 | 56.6 | 80     | 38          | 129           | -79         | 166      | 93       | -80      |
| 3 | 1.18                   | 4.31 | 288 | 0.23 | 37.8 | 83     | -143        | 130           | -82         | 166      | 93       | -161     |
| 4 | 1.30                   | 4.31 | 288 | 0.24 | 59.8 | 78     | 38          | 130           | -82         | 166      | 93       | -161     |

**Table S5.** Relevant geometrical parameters and first electronic transition for most populated conformers of neutral tetraacetylnarciclasine **4**. Reported data are:  $\Delta E$  energy differences from the lowest lying conformer in kJ/mol; first transition energies (eV) and wavelengths (nm); oscillator strengths (dimensionless) and rotational strength ( $10^{-40}$  esu<sup>2</sup>cm<sup>2</sup>); angle between EDTM and MDTM ( $^{\circ}$ ); geometrical parameters  $\varphi 1$  (dioxolane envelope);  $\vartheta 4$  and  $\varphi 4$  (Cremer-Pople parameters defining cyclohexene ring);  $\tau 2$ ,  $\tau 3$  and  $\tau 4$  defining the hydroxyl orientations stemming from cyclohexene (see Fig. S12 for the rings numbering used in CP definitions).

|   | $\Delta E$<br>(kJ/mol) | eV   | nm  | f    | R    | $E\_M$ | $\varphi 1$ | $\vartheta 4$ | $\varphi 4$ | $\tau 1$ | $\tau 2$ | $\tau 3$ | $\tau 4$ |
|---|------------------------|------|-----|------|------|--------|-------------|---------------|-------------|----------|----------|----------|----------|
| 1 | 0.00                   | 4.5  | 275 | 0.23 | 47.4 | 83     | -144        | 128           | -81         | 101      | 166      | 93       | -80      |
| 2 | 0.43                   | 4.49 | 276 | 0.23 | 59.9 | 81     | 37          | 128           | -80         | 103      | 166      | 93       | -80      |
| 3 | 0.52                   | 4.47 | 277 | 0.22 | 53.2 | 82     | -144        | 128           | -80         | -117     | 166      | 93       | -81      |
| 4 | 1.03                   | 4.47 | 278 | 0.22 | 68   | 81     | 37          | 128           | -80         | -116     | 166      | 93       | -80      |
| 5 | 1.61                   | 4.47 | 277 | 0.22 | 63.4 | 80     | -144        | 129           | -83         | -117     | 165      | 93       | -161     |
| 6 | 2.13                   | 4.47 | 278 | 0.23 | 77.6 | 78     | 37          | 129           | -83         | -116     | 166      | 93       | -161     |

## Narciclasine Frontier Orbitals

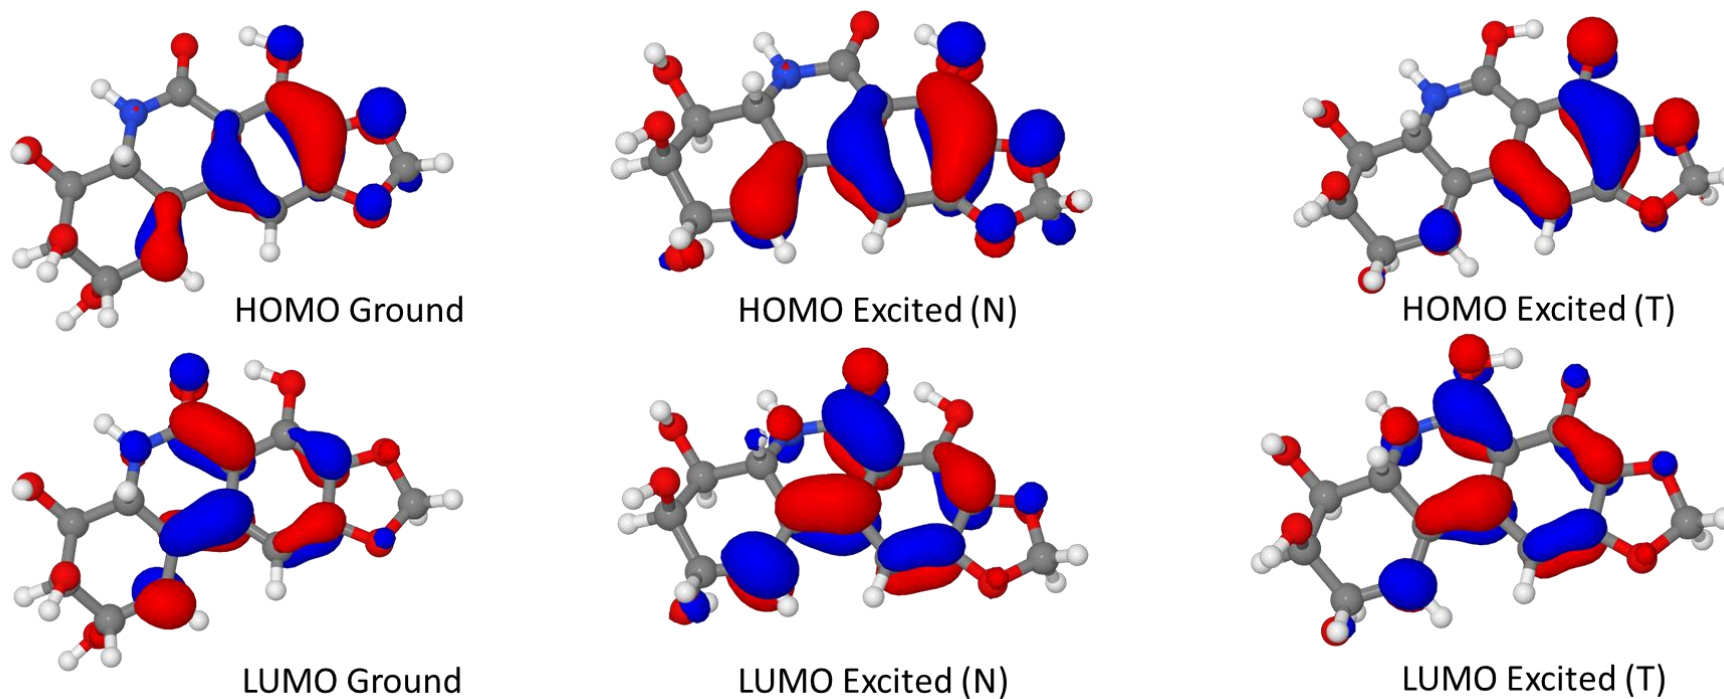

**Fig. S14.** Molecular orbitals representation for narciclasine **2** for ground (left), N form excited (middle) and T form (right) excited states.

## Experimental and Simulated Spectra of Lycorine

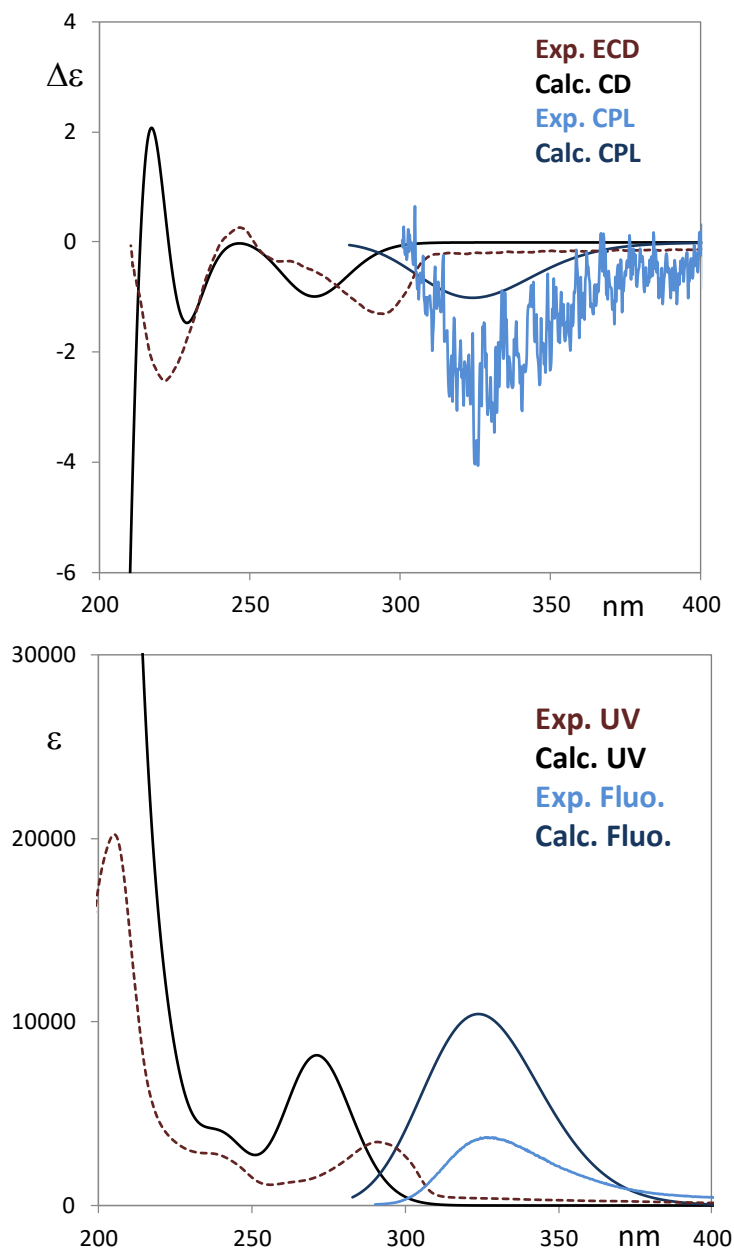

**Fig. S15.** Comparison of experimental and calculated CD and CPL (upper panel) and absorption and fluorescence (lower panel) spectra for lycorine **1**. Calculated spectra were red shifted by 25 nm. For better comparison, calculated CD spectrum has been divided by 4.

## Template DFT Parameters

**Table S6.** Relevant geometrical parameters and first electronic transition for the model compound of Figure 7 (see text). In the ground state  $S_0$ : neutral condition presents only form N, for charged species three stable tautomeric forms are possible. Only  $\varphi_1$  (dioxolane envelope) is necessary to distinguish two possible conformations. Analogously first excited state  $S_1$  is reported in all possible forms. Reported data are:  $\Delta E$  energy differences from the lowest lying form in kJ/mol; first transition energy (eV) and wavelengths (nm); oscillator strengths (dimensionless) and rotational strength ( $10^{-40}$  esu<sup>2</sup>cm<sup>2</sup>); sign is reported for  $\varphi_1$  coordinate (dioxolane envelope).

| $S_0$                | $\varphi_1$ | nm  | $\Delta E$<br>(kJ/mol) | $f$  | $R$   |
|----------------------|-------------|-----|------------------------|------|-------|
| N                    | -           | 281 | 0.00                   | 0.16 | 31.8  |
| N                    | +           | 281 | 0.04                   | 0.16 | 51.0  |
| <b>Excited state</b> |             |     |                        |      |       |
| $S_1$                | $\varphi_1$ | nm  | $\Delta E$<br>(kJ/mol) | $f$  | $R$   |
| N                    | +           | 370 | 20.80                  | 0.39 | 27.1  |
| N                    | -           | 371 | 20.72                  | 0.39 | 19.9  |
| T                    | +           | 451 | 0.21                   | 0.27 | 26.7  |
| T                    | -           | 452 | 0.00                   | 0.27 | 14.2  |
| T(-1)                | +           | 376 | 35.12                  | 0.35 | 23.2  |
| T(-1)                | -           | 377 | 35.37                  | 0.35 | 7.8   |
| NH(-1)               | -           | 414 | 0.00                   | 0.31 | 25.1  |
| NH(-1)               | +           | 419 | 0.08                   | 0.31 | 38.9  |
| N(-1)                | +           | 576 | 27.00                  | 0.02 | -41.5 |
| N(-1)                | -           | 579 | 26.54                  | 0.02 | -40.5 |

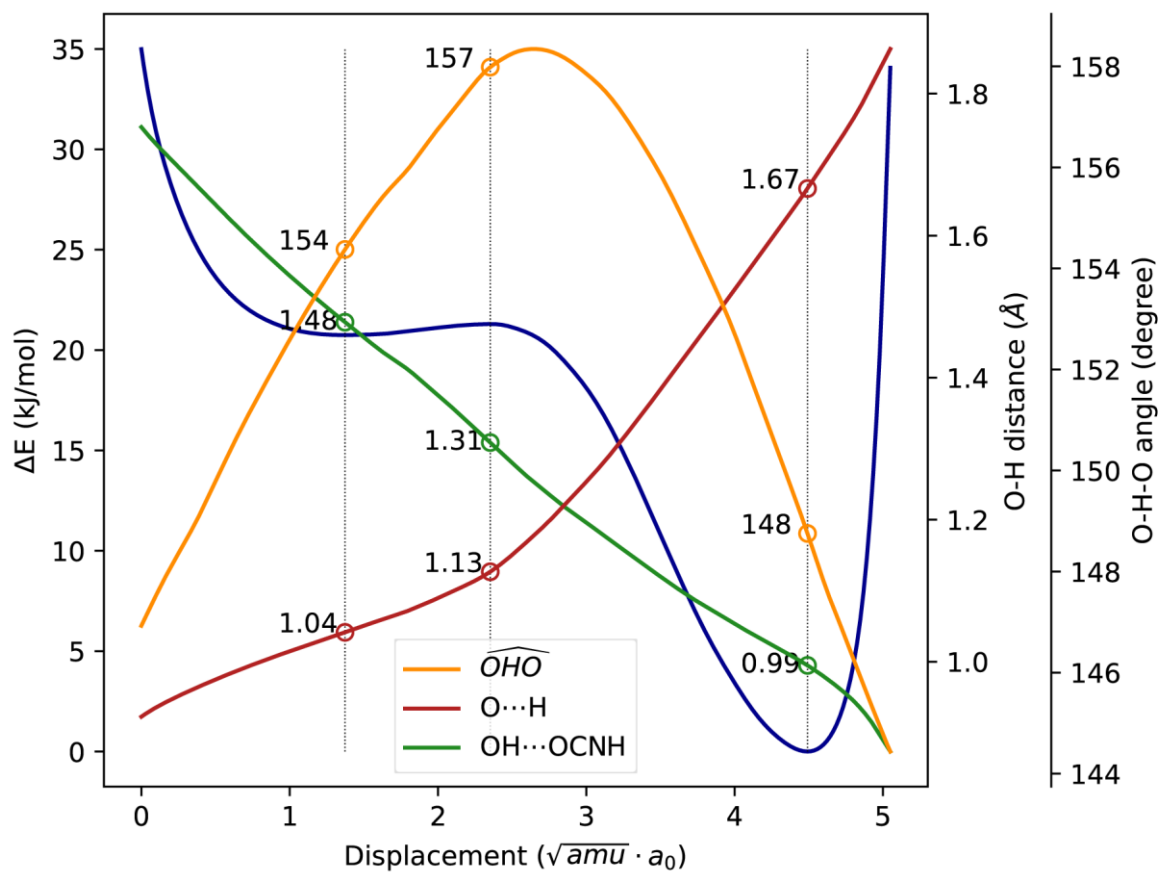

**Fig. S16.** Calculated plots of energy (kJ/mol), C=O...H hydrogen bond distance (Å), OH...OCNH distance (Å), and of OHO angle (degree) as function of the IRC coordinate for the template molecule of Figure 7 (see text)

## Anionic Narciclasine DFT Parameters

**Table S7.** Relevant geometrical parameters and first electronic transition for anionic narciclasine **2** in the ground state  $S_0$  in T(-1), NH(-1) and N(-1) forms (see text). Reported data are:  $\Delta E$  energy differences from the lowest lying form in kJ/mol; first transition energies (eV) and wavelengths (nm); oscillator strengths (dimensionless) and rotational strength ( $10^{-40}$  esu<sup>2</sup>cm<sup>2</sup>); angle between EDTM and MDTM ( $^\circ$ ); geometrical parameters  $\varphi_1$  (dioxolane envelope);  $\vartheta_4$  and  $\varphi_4$  (Cremer-Pople parameters defining cyclohexene ring);  $\tau_2$ ,  $\tau_3$  and  $\tau_4$  defining the hydroxyl orientations stemming from cyclohexene (see Fig. S12 for the rings numbering used in CP definitions).

| Anion<br>$S_0$ | $\Delta E$<br>(kJ/mol) | eV   | nm  | $f$  | $R$   | $E_M$ | $\varphi_1$ | $\vartheta_4$ | $\varphi_4$ | $\tau_2$ | $\tau_3$ | $\tau_4$ |
|----------------|------------------------|------|-----|------|-------|-------|-------------|---------------|-------------|----------|----------|----------|
| T(-1)          | 0.00                   | 4.15 | 299 | 0.20 | -4.9  | 97    | 39          | 52            | 67          | -170     | -168     | -162     |
| T(-1)          | 0.35                   | 4.15 | 299 | 0.20 | -19.1 | 108   | -143        | 52            | 67          | -170     | -168     | -162     |
| NH(-1)         | 1.19                   | 3.68 | 337 | 0.23 | 2.7   | 88    | -141        | 129           | -85         | -73      | 164      | -111     |
| NH(-1)         | 2.33                   | 3.68 | 337 | 0.23 | 17.1  | 74    | 38          | 129           | -86         | -73      | 164      | -111     |
| NH(-1)         | 3.50                   | 3.78 | 328 | 0.24 | 9.2   | 85    | -141        | 53            | 62          | -169     | -167     | -162     |
| T(-1)          | 3.95                   | 4.07 | 305 | 0.19 | -6.8  | 110   | -143        | 130           | -91         | -73      | 164      | 84       |
| T(-1)          | 4.07                   | 4.07 | 305 | 0.19 | -19.7 | 128   | -143        | 130           | -91         | -73      | 164      | 84       |
| NH(-1)         | 4.38                   | 3.80 | 326 | 0.24 | 21.9  | 77    | 39          | 53            | 63          | -169     | -167     | -162     |
| N(-1)          | 4.50                   | 4.52 | 274 | 0.03 | -7.9  | 96    | 39          | 52            | 68          | -171     | -168     | -162     |
| N(-1)          | 4.71                   | 4.53 | 274 | 0.03 | -8.1  | 96    | -144        | 52            | 68          | -171     | -168     | -162     |
| N(-1)          | 9.60                   | 4.35 | 285 | 0.03 | 28.9  | 72    | 38          | 130           | -93         | -73      | 164      | 84       |
| N(-1)          | 9.65                   | 4.36 | 284 | 0.03 | 32.6  | 70    | -144        | 130           | -93         | -73      | 164      | 84       |

**Table S8.** Relevant geometrical parameters and first electronic transition for anionic narciclasine **2** in the excited state S1 in T(-1), NH(-1) and N(-1) forms (see text). Reported data are:  $\Delta E$  energy differences from the lowest lying form in kJ/mol; transition energies (eV) and wavelengths (nm); oscillator strengths (dimensionless) and rotational strength ( $10^{-40}$  esu<sup>2</sup>cm<sup>2</sup>); angle between EDTM and MDTM ( $^{\circ}$ ); geometrical parameters  $\varphi 1$  (dioxolane envelope);  $\vartheta 4$  and  $\varphi 4$  (Cremer-Pople parameters defining cyclohexene ring);  $\tau 2$ ,  $\tau 3$  and  $\tau 4$  defining the hydroxyl orientations stemming from cyclohexene.

| Anion<br>S1 | $\Delta E$<br>(kJ/mol) | eV   | nm  | $f$  | $R$   | $E\_M$ | $\varphi 1$ | $\vartheta 4$ | $\varphi 4$ | $\tau 2$ | $\tau 3$ | $\tau 4$ |
|-------------|------------------------|------|-----|------|-------|--------|-------------|---------------|-------------|----------|----------|----------|
| NH(-1)      | 0.00                   | 2.91 | 427 | 0.34 | 19.9  | 73     | -138        | 133           | -83         | -73      | 166      | 98       |
| NH(-1)      | 0.39                   | 2.88 | 430 | 0.35 | 30.0  | 69     | 30          | 133           | -82         | -73      | 166      | 98       |
| NH(-1)      | 12.21                  | 2.98 | 416 | 0.34 | 35.1  | 71     | -138        | 58            | 60          | -168     | -165     | -164     |
| NH(-1)      | 12.40                  | 2.95 | 420 | 0.34 | 49.8  | 60     | 29          | 58            | 60          | -168     | -165     | -164     |
| N(-1)       | 29.24                  | 2.15 | 577 | 0.01 | -32.6 | 110    | -143        | 126           | -90         | -74      | 167      | 98       |
| N(-1)       | 29.57                  | 2.16 | 574 | 0.01 | -32.5 | 110    | 39          | 126           | -90         | -74      | 167      | 98       |
| N(-1)       | 37.02                  | 2.23 | 556 | 0.03 | -57.0 | 115    | -143        | 53            | 60          | -169     | -165     | -166     |
| N(-1)       | 37.50                  | 2.25 | 552 | 0.03 | -58.7 | 115    | 39          | 53            | 60          | -169     | -165     | -166     |
| T(-1)       | 37.73                  | 3.21 | 386 | 0.39 | 15.7  | 47     | 36          | 133           | -90         | -72      | 166      | 95       |
| T(-1)       | 38.02                  | 3.21 | 386 | 0.38 | 1.9   | 87     | -145        | 133           | -89         | -72      | 166      | 95       |
| T(-1)       | 41.84                  | 3.30 | 376 | 0.38 | 23.8  | 60     | 35          | 56            | 64          | -169     | -166     | -164     |
| T(-1)       | 42.21                  | 3.30 | 376 | 0.38 | 4.4   | 87     | -146        | 57            | 64          | -169     | -166     | -164     |

## Simulated Spectra of Anionic Narciclasine

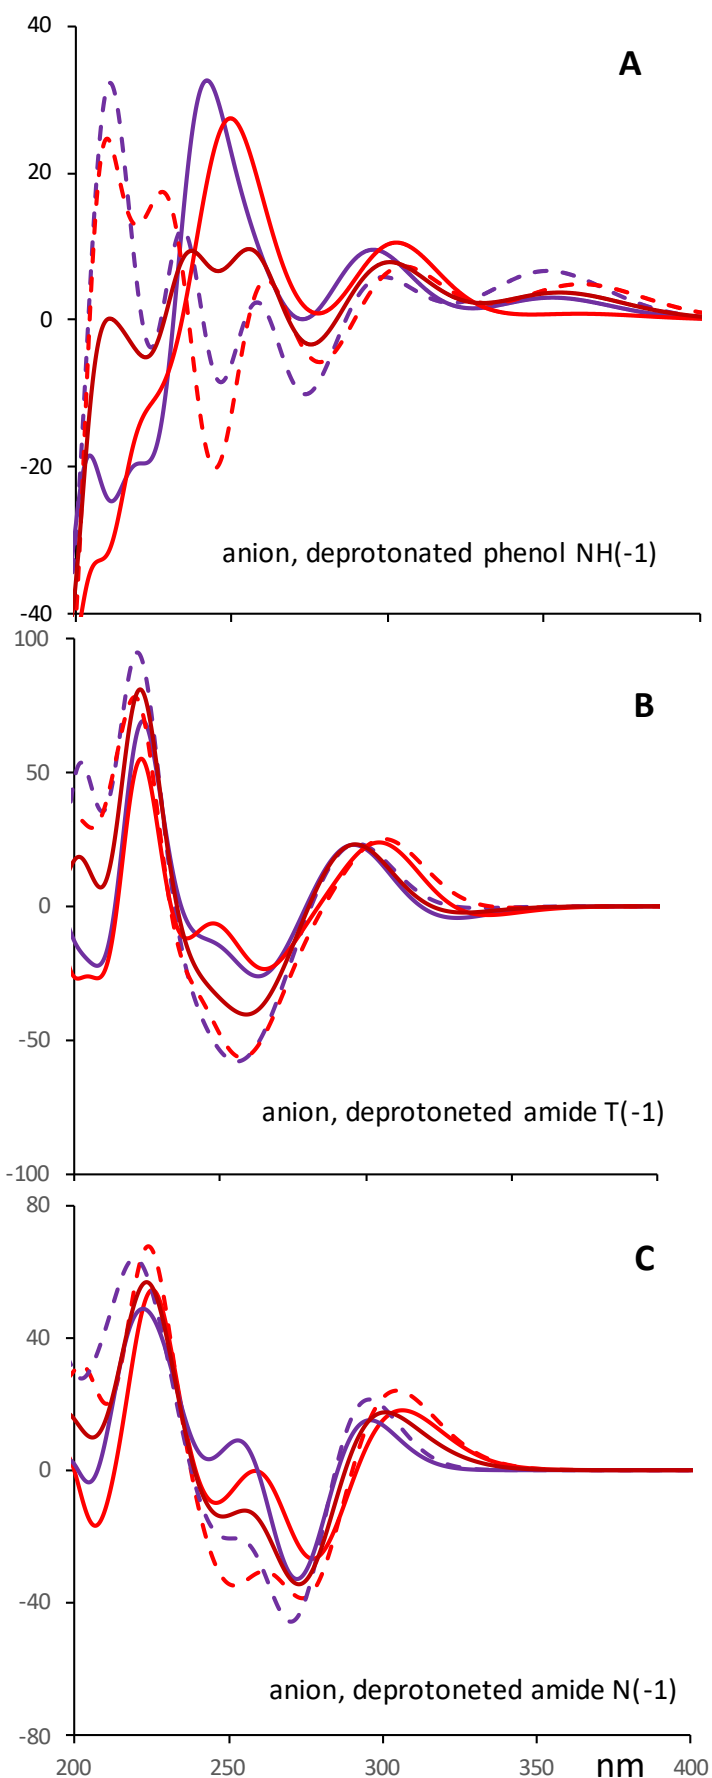

**Fig. S17.** Calculated CD spectra for narciclasine **2** in various charged states and different backbone conformational states. Full lines are relative to  $\varphi_1 \approx -143^\circ$ , dashed lines to  $\varphi_1 \approx 40^\circ$  (dioxolane envelopes). Red lines:  $\theta_4 \approx 130^\circ$ ,  $\varphi_4 \approx -85^\circ$ , purple lines:  $\theta_4 \approx 52^\circ$ ,  $\varphi_4 \approx 67^\circ$  referred to cyclohexene half chair conformation. Brown line represents the arithmetic average of the spectra generated in the four possible polycyclic backbone conformers. All spectra have been red shifted by 25 nm for better comparison with experimental data. Top panel (A): anion, deprotonated phenol NH(-1). Middle panel (B): anion, deprotonated amide tautomer T(-1). Bottom panel (C): anion, deprotonated amide normal N(-1).



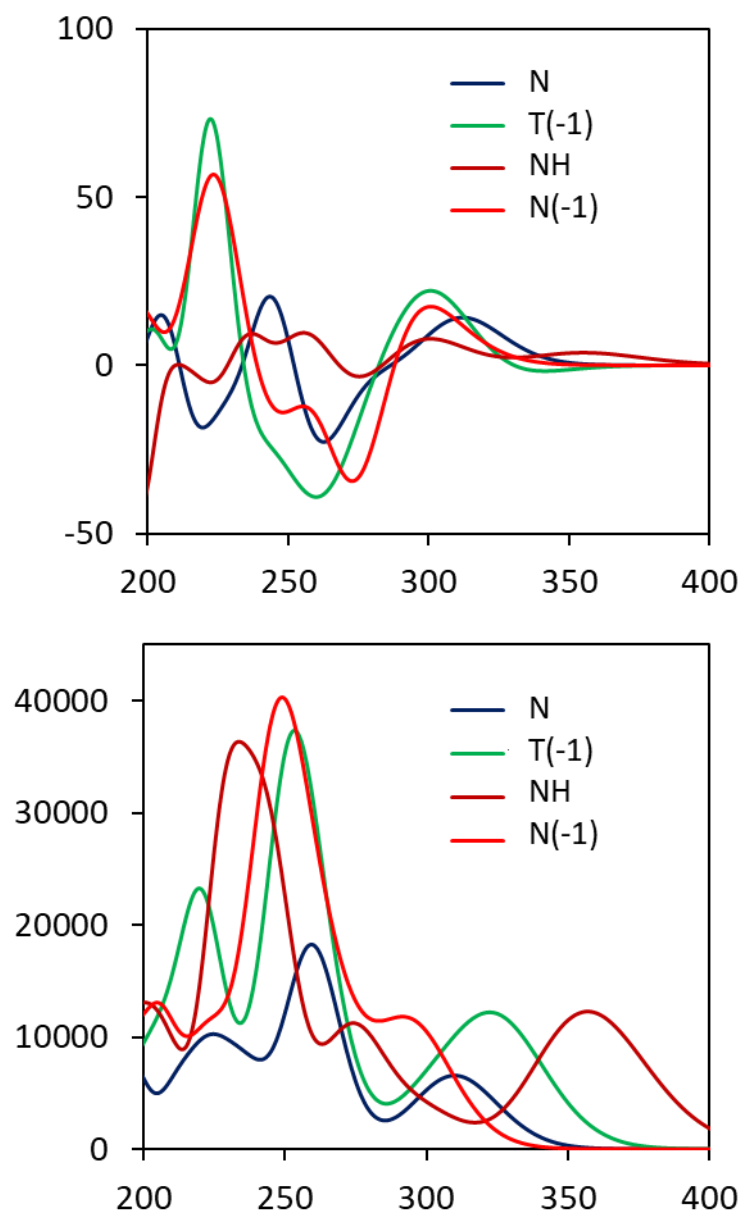

**Fig. S18.** Calculated average CD (Top) and UV (Bottom) spectra for narciclasine **2** in various charged states. (See text for discussion).

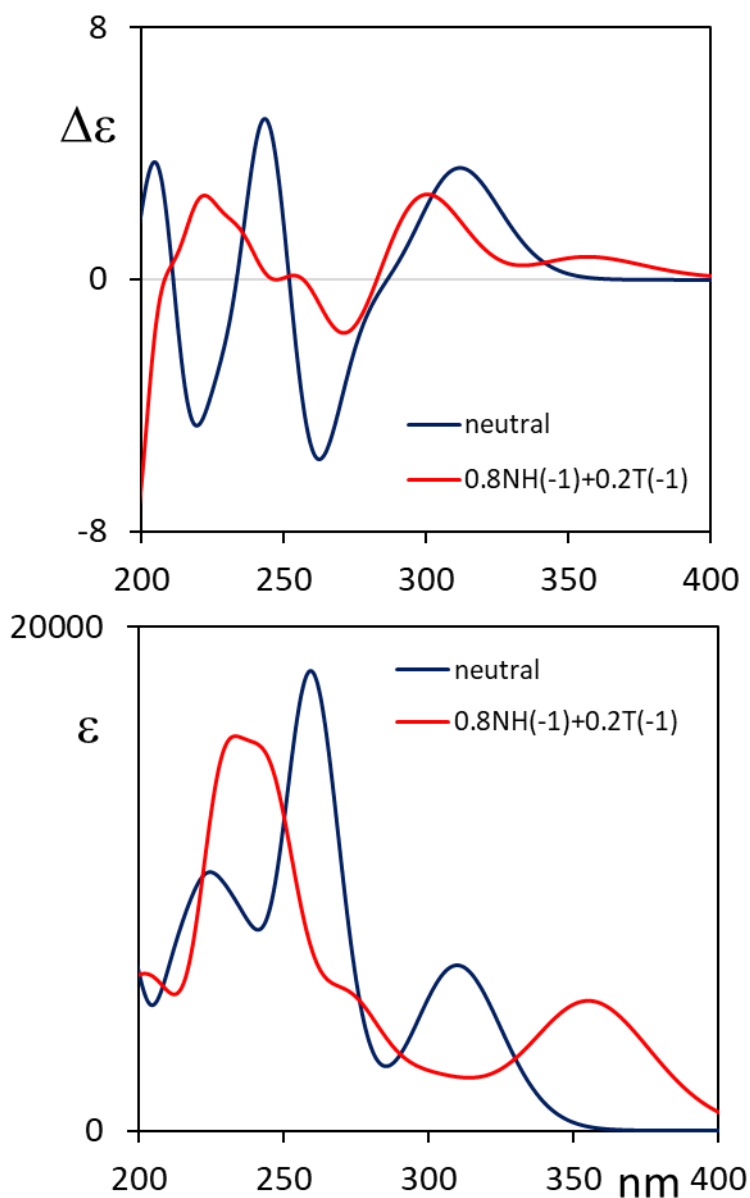

**Fig. S19.** Calculated CD (Top) and absorption (Lower) spectra for narciclasine **2** in the neutral form (blue line) and in anionic form with contributions from both the deprotonated phenol species and from the deprotonated amide in tautomeric form. For sake of comparison with experimental data both calculated ECD spectra have been divided by four and calculated absorption spectra by two. All calculated spectra have been red shifted by 25 nm. The percentage of contribution of the two species is chosen ad hoc to reproduce the experimental data of Figure 5 in the text.

# Geometries in XYZ format

## Lycorine

### Ground State

38

Energy: -975.49504555

|   |           |           |           |
|---|-----------|-----------|-----------|
| H | -1.387255 | -2.161054 | -0.293301 |
| C | -1.637227 | -1.112385 | -0.197499 |
| C | -2.337934 | 1.616406  | 0.039965  |
| C | -0.641510 | -0.118328 | -0.167996 |
| C | -2.943017 | -0.709602 | -0.107884 |
| C | -3.286708 | 0.629831  | 0.008004  |
| C | -0.988537 | 1.233769  | -0.052172 |
| H | -2.616221 | 2.658588  | 0.135597  |
| O | -4.080727 | -1.472693 | -0.066349 |
| O | -4.647711 | 0.737695  | 0.125252  |
| C | -5.142894 | -0.541243 | -0.271500 |
| H | -5.396381 | -0.514086 | -1.334974 |
| H | -5.991059 | -0.812382 | 0.348378  |
| C | 0.048893  | 2.346409  | 0.026402  |
| H | -0.265166 | 3.183789  | -0.599824 |
| H | 0.079440  | 2.711817  | 1.068872  |
| N | 1.362935  | 1.887062  | -0.384723 |
| C | 0.820951  | -0.490996 | -0.307309 |
| H | 1.062167  | -0.559545 | -1.375485 |
| C | 1.649072  | 0.624577  | 0.271575  |
| H | 1.440457  | 0.705499  | 1.355579  |
| C | 3.114184  | 0.432001  | 0.072674  |
| C | 3.639044  | -0.784834 | 0.007843  |
| H | 4.699661  | -0.943296 | -0.160812 |
| C | 2.787595  | -2.033870 | 0.059059  |
| H | 3.144067  | -2.704664 | 0.843543  |
| C | 1.288093  | -1.794611 | 0.340511  |
| H | 0.759788  | -2.654482 | -0.081161 |
| O | 2.949237  | -2.765379 | -1.157735 |
| H | 2.906127  | -2.141555 | -1.891904 |
| O | 1.127662  | -1.770051 | 1.753762  |
| H | 0.210985  | -1.543205 | 1.953250  |
| C | 2.489952  | 2.743136  | -0.002631 |
| H | 2.552597  | 3.620926  | -0.644632 |
| H | 2.378090  | 3.081839  | 1.039409  |
| C | 3.714390  | 1.809473  | -0.121440 |
| H | 4.167897  | 1.881709  | -1.110959 |
| H | 4.480496  | 2.045691  | 0.616448  |

38

Energy: -975.49501309

|   |           |           |           |
|---|-----------|-----------|-----------|
| H | -1.388208 | -2.157429 | -0.293430 |
| C | -1.635984 | -1.110654 | -0.174138 |
| C | -2.333984 | 1.617063  | 0.082242  |
| C | -0.639882 | -0.117049 | -0.148609 |
| C | -2.940121 | -0.709237 | -0.056225 |
| C | -3.282394 | 0.629718  | 0.068808  |
| C | -0.985562 | 1.234576  | -0.023146 |
| H | -2.612028 | 2.660079  | 0.169230  |
| O | -4.082456 | -1.465278 | -0.096038 |
| O | -4.647265 | 0.744311  | 0.111296  |
| C | -5.109969 | -0.583804 | 0.356760  |
| H | -6.019426 | -0.763582 | -0.206944 |
| H | -5.253199 | -0.721072 | 1.432249  |
| C | 0.053039  | 2.345894  | 0.056440  |
| H | -0.265863 | 3.188170  | -0.560858 |
| H | 0.092496  | 2.703453  | 1.101303  |
| N | 1.363440  | 1.888668  | -0.368455 |
| C | 0.821550  | -0.489740 | -0.299431 |
| H | 1.054637  | -0.553458 | -1.369738 |
| C | 1.654435  | 0.622611  | 0.278759  |
| H | 1.454104  | 0.697890  | 1.364763  |
| C | 3.117885  | 0.430671  | 0.067586  |
| C | 3.641796  | -0.786020 | -0.006781 |
| H | 4.701030  | -0.944059 | -0.184323 |
| C | 2.790421  | -2.035024 | 0.045523  |
| H | 3.152297  | -2.708880 | 0.824900  |
| C | 1.292896  | -1.796655 | 0.338541  |
| H | 0.761317  | -2.654158 | -0.083812 |
| O | 2.943538  | -2.762042 | -1.175069 |
| H | 2.893611  | -2.135895 | -1.906841 |
| O | 1.141770  | -1.779302 | 1.752970  |
| H | 0.226394  | -1.553296 | 1.959298  |
| C | 2.493851  | 2.742298  | 0.008943  |
| H | 2.551689  | 3.623406  | -0.628936 |
| H | 2.390615  | 3.075575  | 1.053623  |
| C | 3.716967  | 1.808873  | -0.124600 |
| H | 4.162448  | 1.885990  | -1.117388 |
| H | 4.489150  | 2.041114  | 0.608204  |

38

Energy: -975.49442505

|   |           |           |           |
|---|-----------|-----------|-----------|
| H | -1.382167 | -2.157585 | -0.296396 |
| C | -1.633206 | -1.109360 | -0.198707 |
| C | -2.339094 | 1.617285  | 0.042890  |
| C | -0.638663 | -0.114023 | -0.167425 |
| C | -2.939814 | -0.709260 | -0.108966 |
| C | -3.286174 | 0.629159  | 0.009200  |
| C | -0.988954 | 1.237249  | -0.049421 |
| H | -2.619196 | 2.658877  | 0.139760  |
| O | -4.076219 | -1.474751 | -0.069127 |
| O | -4.647643 | 0.734097  | 0.126291  |
| C | -5.139761 | -0.544829 | -0.273991 |
| H | -5.391548 | -0.515900 | -1.337852 |
| H | -5.988456 | -0.818913 | 0.343869  |
| C | 0.046343  | 2.351815  | 0.029364  |
| H | -0.271040 | 3.189956  | -0.594238 |
| H | 0.079061  | 2.715151  | 1.072621  |
| N | 1.359324  | 1.895135  | -0.386513 |
| C | 0.824403  | -0.484224 | -0.306924 |
| H | 1.072826  | -0.563678 | -1.371576 |
| C | 1.651098  | 0.633579  | 0.269561  |
| H | 1.446967  | 0.716143  | 1.354416  |
| C | 3.114699  | 0.443256  | 0.058520  |
| C | 3.637155  | -0.771954 | -0.025268 |
| H | 4.693523  | -0.931467 | -0.215199 |
| C | 2.792692  | -2.021431 | 0.056968  |
| H | 3.164539  | -2.665167 | 0.861565  |
| C | 1.293360  | -1.784452 | 0.343772  |
| H | 0.755699  | -2.642213 | -0.074432 |
| O | 2.954057  | -2.684735 | -1.198050 |
| H | 2.651246  | -3.595034 | -1.104513 |
| O | 1.135482  | -1.762689 | 1.756963  |
| H | 0.222664  | -1.522228 | 1.958437  |
| C | 2.486638  | 2.753511  | -0.011347 |
| H | 2.543774  | 3.631120  | -0.654220 |
| H | 2.379808  | 3.092855  | 1.031140  |
| C | 3.712444  | 1.822036  | -0.136335 |
| H | 4.162426  | 1.897012  | -1.127216 |
| H | 4.480200  | 2.059609  | 0.599476  |

38

Energy: -975.49438109

|   |           |           |           |
|---|-----------|-----------|-----------|
| H | -1.379008 | -2.160694 | -0.275682 |
| C | -1.628906 | -1.114642 | -0.154651 |
| C | -2.335244 | 1.610072  | 0.105788  |
| C | -0.635517 | -0.118045 | -0.134433 |
| C | -2.933869 | -0.717974 | -0.029844 |
| C | -3.280371 | 0.619546  | 0.097348  |
| C | -0.986050 | 1.232324  | -0.006729 |
| H | -2.616365 | 2.652167  | 0.194048  |
| O | -4.073783 | -1.478303 | -0.063871 |
| O | -4.645605 | 0.729205  | 0.146901  |
| C | -5.102054 | -0.600610 | 0.394480  |
| H | -6.013856 | -0.783619 | -0.164400 |
| H | -5.239094 | -0.738598 | 1.470714  |
| C | 0.048887  | 2.347469  | 0.065875  |
| H | -0.278100 | 3.189051  | -0.548208 |
| H | 0.095545  | 2.704520  | 1.110744  |
| N | 1.356624  | 1.894616  | -0.370165 |
| C | 0.826312  | -0.485959 | -0.293098 |
| H | 1.060870  | -0.561528 | -1.361225 |
| C | 1.658952  | 0.630831  | 0.276750  |
| H | 1.468911  | 0.708742  | 1.364536  |
| C | 3.119900  | 0.443524  | 0.045705  |
| C | 3.642916  | -0.770625 | -0.049089 |
| H | 4.696914  | -0.927943 | -0.253434 |
| C | 2.801362  | -2.021596 | 0.039871  |
| H | 3.184511  | -2.667348 | 0.837523  |
| C | 1.305402  | -1.787893 | 0.346637  |
| H | 0.763641  | -2.644798 | -0.068020 |
| O | 2.947704  | -2.680506 | -1.219316 |
| H | 2.646770  | -3.591353 | -1.125182 |
| O | 1.164976  | -1.771938 | 1.761793  |
| H | 0.254135  | -1.534176 | 1.975100  |
| C | 2.487742  | 2.753054  | -0.006893 |
| H | 2.535048  | 3.633230  | -0.647030 |
| H | 2.394577  | 3.088175  | 1.038268  |
| C | 3.713054  | 1.823840  | -0.151993 |
| H | 4.149645  | 1.903288  | -1.148493 |
| H | 4.490292  | 2.059654  | 0.574377  |

38

Energy: -975.49436721

|   |           |           |           |
|---|-----------|-----------|-----------|
| H | -1.382526 | -2.158989 | -0.348200 |
| C | -1.634651 | -1.108960 | -0.283296 |
| C | -2.337192 | 1.622856  | -0.097211 |
| C | -0.638533 | -0.118695 | -0.219555 |
| C | -2.941216 | -0.701839 | -0.254326 |
| C | -3.286689 | 0.639253  | -0.163479 |
| C | -0.985972 | 1.234536  | -0.129562 |
| H | -2.615263 | 2.666621  | -0.019610 |
| O | -4.083270 | -1.462227 | -0.253364 |
| O | -4.652348 | 0.750484  | -0.104450 |
| C | -5.130835 | -0.529750 | -0.516164 |
| H | -5.332107 | -0.508824 | -1.591119 |
| H | -6.009363 | -0.794366 | 0.062969  |
| C | 0.050730  | 2.343893  | -0.010865 |
| H | -0.238440 | 3.184890  | -0.644300 |
| H | 0.047599  | 2.705666  | 1.033394  |
| N | 1.376413  | 1.882507  | -0.379288 |
| C | 0.826227  | -0.493673 | -0.308613 |
| H | 1.097939  | -0.559251 | -1.369554 |
| C | 1.644052  | 0.621151  | 0.288376  |
| H | 1.412030  | 0.703228  | 1.366748  |
| C | 3.113338  | 0.428554  | 0.115113  |
| C | 3.640624  | -0.786328 | 0.032069  |
| H | 4.703649  | -0.938877 | -0.127026 |
| C | 2.786795  | -2.034197 | 0.043273  |
| H | 3.154725  | -2.733410 | 0.799291  |
| C | 1.285854  | -1.793447 | 0.341792  |
| H | 0.749643  | -2.652350 | -0.071393 |
| O | 2.936312  | -2.728312 | -1.197024 |
| H | 2.907197  | -2.079921 | -1.910247 |
| O | 1.051611  | -1.687686 | 1.739371  |
| H | 1.217354  | -2.544830 | 2.146133  |
| C | 2.490894  | 2.740084  | 0.033606  |
| H | 2.571063  | 3.616910  | -0.607849 |
| H | 2.348683  | 3.080689  | 1.071343  |
| C | 3.719355  | 1.807470  | -0.048466 |
| H | 4.209670  | 1.886658  | -1.019620 |
| H | 4.457468  | 2.038264  | 0.719223  |

38

Energy: -975.49434781

|   |           |           |           |
|---|-----------|-----------|-----------|
| H | -1.390505 | -2.156396 | -0.331581 |
| C | -1.641583 | -1.107967 | -0.241538 |
| C | -2.342262 | 1.622630  | -0.032158 |
| C | -0.645004 | -0.117837 | -0.185757 |
| C | -2.947531 | -0.702468 | -0.177917 |
| C | -3.291938 | 0.638036  | -0.075994 |
| C | -0.991496 | 1.234905  | -0.084859 |
| H | -2.619757 | 2.667070  | 0.038180  |
| O | -4.090886 | -1.456966 | -0.254135 |
| O | -4.658559 | 0.754896  | -0.086202 |
| C | -5.130055 | -0.570010 | 0.157861  |
| H | -6.022301 | -0.754304 | -0.431420 |
| H | -5.306521 | -0.696337 | 1.229937  |
| C | 0.046455  | 2.343475  | 0.028567  |
| H | -0.252108 | 3.189037  | -0.594501 |
| H | 0.058571  | 2.697601  | 1.075310  |
| N | 1.366803  | 1.884758  | -0.362024 |
| C | 0.818752  | -0.492338 | -0.293736 |
| H | 1.076351  | -0.554899 | -1.358421 |
| C | 1.644257  | 0.620440  | 0.296130  |
| H | 1.427120  | 0.697994  | 1.377930  |
| C | 3.111006  | 0.429047  | 0.101999  |
| C | 3.637459  | -0.785400 | 0.007892  |
| H | 4.698293  | -0.937116 | -0.165938 |
| C | 2.784279  | -2.033661 | 0.027616  |
| H | 3.162328  | -2.734125 | 0.777485  |
| C | 1.287234  | -1.794034 | 0.346596  |
| H | 0.745505  | -2.651677 | -0.061941 |
| O | 2.917847  | -2.725542 | -1.215650 |
| H | 2.877374  | -2.076328 | -1.927573 |
| O | 1.071683  | -1.692834 | 1.747548  |
| H | 1.241947  | -2.551646 | 2.148913  |
| C | 2.486929  | 2.740677  | 0.039107  |
| H | 2.557844  | 3.620553  | -0.599244 |
| H | 2.359392  | 3.076294  | 1.080359  |
| C | 3.714238  | 1.808796  | -0.064798 |
| H | 4.190182  | 1.892140  | -1.042735 |
| H | 4.463545  | 2.036663  | 0.692856  |



# Neutral narciclasine

## Ground State

35

Energy: -1122.61724232

|   |           |           |           |
|---|-----------|-----------|-----------|
| C | -3.263132 | -0.048792 | -0.061188 |
| C | -2.488179 | 1.081187  | 0.091738  |
| C | -1.085279 | 0.888391  | 0.075940  |
| C | -0.523604 | -0.393516 | -0.068661 |
| C | -1.338881 | -1.514911 | -0.240902 |
| C | -2.698075 | -1.298870 | -0.224267 |
| C | -0.226355 | 2.079099  | 0.239319  |
| C | 0.947294  | -0.527013 | -0.011097 |
| C | 1.733709  | 0.700358  | -0.395744 |
| N | 1.094162  | 1.909675  | 0.103151  |
| C | 3.161873  | 0.662516  | 0.142953  |
| H | 3.129297  | 0.761759  | 1.230281  |
| C | 3.815107  | -0.654189 | -0.226089 |
| C | 3.052974  | -1.831814 | 0.390662  |
| C | 1.562474  | -1.662166 | 0.326035  |
| O | -0.707546 | 3.196039  | 0.495038  |
| O | -4.625747 | -0.136425 | -0.151786 |
| O | -3.073634 | 2.277101  | 0.236121  |
| H | -0.933192 | -2.502938 | -0.399375 |
| O | -3.692192 | -2.211318 | -0.411036 |
| H | 1.660806  | 2.749419  | 0.115829  |
| H | 0.982784  | -2.531574 | 0.615141  |
| O | 3.475814  | -2.063068 | 1.731901  |
| H | 4.839192  | -0.667890 | 0.155149  |
| H | -2.337549 | 2.925202  | 0.380197  |
| C | -4.891982 | -1.532385 | -0.024133 |
| H | -5.109754 | -1.766151 | 1.021096  |
| H | -5.699895 | -1.813465 | -0.690933 |
| O | 3.803411  | -0.703826 | -1.646428 |
| H | 4.426396  | -1.372839 | -1.949238 |
| O | 3.895361  | 1.769904  | -0.340204 |
| H | 4.111075  | 1.585423  | -1.265066 |
| H | 1.785254  | 0.748426  | -1.490809 |
| H | 3.337272  | -2.733340 | -0.158060 |
| H | 2.997780  | -1.464368 | 2.317490  |

35

Energy: -1122.61724314

|   |           |           |           |
|---|-----------|-----------|-----------|
| C | -3.265778 | -0.054512 | -0.059796 |
| C | -2.493329 | 1.077052  | 0.093209  |
| C | -1.089991 | 0.887285  | 0.078236  |
| C | -0.525599 | -0.393564 | -0.064259 |
| C | -1.338242 | -1.516937 | -0.235871 |
| C | -2.697944 | -1.303678 | -0.220469 |
| C | -0.233100 | 2.079249  | 0.244640  |
| C | 0.945501  | -0.522572 | -0.005490 |
| C | 1.727426  | 0.705060  | -0.396583 |
| N | 1.087570  | 1.912329  | 0.108381  |
| C | 3.157235  | 0.666065  | 0.135773  |
| H | 3.131860  | 0.747591  | 1.223628  |
| C | 3.807656  | -0.648353 | -0.242789 |
| C | 3.053706  | -1.818825 | 0.397231  |
| C | 1.563854  | -1.649257 | 0.347838  |
| O | -0.716828 | 3.194829  | 0.502890  |
| O | -4.628603 | -0.145308 | -0.152081 |
| O | -3.080926 | 2.272302  | 0.236646  |
| H | -0.929209 | -2.504069 | -0.391760 |
| O | -3.690265 | -2.218544 | -0.407083 |
| H | 1.653642  | 2.752299  | 0.125825  |
| H | 0.988278  | -2.515717 | 0.652461  |
| O | 3.410611  | -1.952521 | 1.769967  |
| H | 4.839950  | -0.650404 | 0.119939  |
| H | -2.345757 | 2.920891  | 0.383541  |
| C | -4.891434 | -1.541443 | -0.021256 |
| H | -5.108273 | -1.773584 | 1.024574  |
| H | -5.698968 | -1.825963 | -0.687091 |
| O | 3.777230  | -0.707953 | -1.661757 |
| H | 4.387023  | -1.387247 | -1.968540 |
| O | 3.888170  | 1.777256  | -0.345137 |
| H | 4.086811  | 1.606780  | -1.276286 |
| H | 1.771543  | 0.756177  | -1.491894 |
| H | 3.321124  | -2.732111 | -0.146966 |
| H | 4.294108  | -2.334852 | 1.823867  |

35

Energy: -1122.61720181

|   |           |           |           |
|---|-----------|-----------|-----------|
| C | -3.262427 | -0.044753 | -0.108536 |
| C | -2.488362 | 1.081608  | 0.072235  |
| C | -1.085309 | 0.888090  | 0.065237  |
| C | -0.523189 | -0.393820 | -0.076827 |
| C | -1.337859 | -1.514093 | -0.258853 |
| C | -2.696824 | -1.294903 | -0.267344 |
| C | -0.227218 | 2.078082  | 0.237804  |
| C | 0.948114  | -0.526585 | -0.017571 |
| C | 1.734441  | 0.702239  | -0.397873 |
| N | 1.093534  | 1.909709  | 0.103722  |
| C | 3.161708  | 0.664015  | 0.143330  |
| H | 3.126846  | 0.760823  | 1.230847  |
| C | 3.816641  | -0.651466 | -0.227038 |
| C | 3.053912  | -1.831008 | 0.385356  |
| C | 1.563373  | -1.661986 | 0.318222  |
| O | -0.709210 | 3.193074  | 0.500913  |
| O | -4.627244 | -0.145310 | -0.110473 |
| O | -3.074307 | 2.273051  | 0.246662  |
| H | -0.932606 | -2.503656 | -0.408001 |
| O | -3.691351 | -2.216654 | -0.395483 |
| H | 1.660852  | 2.748784  | 0.125493  |
| H | 0.983741  | -2.532939 | 0.602755  |
| O | 3.474656  | -2.066190 | 1.726485  |
| H | 4.839775  | -0.665183 | 0.156790  |
| H | -2.337703 | 2.918687  | 0.400314  |
| C | -4.878086 | -1.450574 | -0.629804 |
| H | -5.711160 | -1.900924 | -0.100989 |
| H | -5.051115 | -1.385381 | -1.706929 |
| O | 3.808507  | -0.698114 | -1.647450 |
| H | 4.431697  | -1.367109 | -1.949956 |
| O | 3.895418  | 1.772923  | -0.335820 |
| H | 4.113378  | 1.590698  | -1.260607 |
| H | 1.787770  | 0.753219  | -1.492709 |
| H | 3.339490  | -2.730789 | -0.165578 |
| H | 2.998592  | -1.466594 | 2.312766  |

35

Energy: -1122.61719371

|   |           |           |           |
|---|-----------|-----------|-----------|
| C | -3.264882 | -0.049513 | -0.110210 |
| C | -2.493279 | 1.078397  | 0.070961  |
| C | -1.089782 | 0.887752  | 0.064975  |
| C | -0.525067 | -0.393086 | -0.075598 |
| C | -1.337153 | -1.515196 | -0.257627 |
| C | -2.696613 | -1.298702 | -0.267267 |
| C | -0.233550 | 2.078803  | 0.241041  |
| C | 0.946392  | -0.521642 | -0.014292 |
| C | 1.729127  | 0.707457  | -0.399252 |
| N | 1.087339  | 1.912885  | 0.107520  |
| C | 3.157141  | 0.667555  | 0.138134  |
| H | 3.127621  | 0.746014  | 1.226147  |
| C | 3.809839  | -0.645467 | -0.241427 |
| C | 3.053854  | -1.818250 | 0.391794  |
| C | 1.564086  | -1.649147 | 0.337195  |
| O | -0.718029 | 3.192507  | 0.506573  |
| O | -4.629956 | -0.153205 | -0.112863 |
| O | -3.081343 | 2.269045  | 0.244945  |
| H | -0.928680 | -2.503780 | -0.404957 |
| O | -3.689447 | -2.222640 | -0.395576 |
| H | 1.654150  | 2.752071  | 0.134852  |
| H | 0.987938  | -2.517289 | 0.635917  |
| O | 3.405449  | -1.956662 | 1.765324  |
| H | 4.840616  | -0.647823 | 0.125766  |
| H | -2.345509 | 2.915101  | 0.401539  |
| C | -4.876907 | -1.458666 | -0.632918 |
| H | -5.710654 | -1.910672 | -0.106558 |
| H | -5.047062 | -1.393814 | -1.710588 |
| O | 3.785741  | -0.701102 | -1.660648 |
| H | 4.395213  | -1.381194 | -1.966380 |
| O | 3.889241  | 1.780444  | -0.336914 |
| H | 4.091683  | 1.612646  | -1.267740 |
| H | 1.777048  | 0.761799  | -1.494226 |
| H | 3.323631  | -2.729416 | -0.154780 |
| H | 4.288017  | -2.340754 | 1.821416  |

35

Energy: -1122.61699345

|   |           |           |           |
|---|-----------|-----------|-----------|
| C | -3.264735 | -0.050109 | -0.055893 |
| C | -2.490527 | 1.080174  | 0.097245  |
| C | -1.087405 | 0.888565  | 0.079098  |
| C | -0.524884 | -0.392637 | -0.067372 |
| C | -1.339354 | -1.514506 | -0.239865 |
| C | -2.698751 | -1.299596 | -0.220678 |
| C | -0.228627 | 2.078752  | 0.244876  |
| C | 0.945906  | -0.524970 | -0.010206 |
| C | 1.728804  | 0.702273  | -0.400557 |
| N | 1.092322  | 1.909834  | 0.109046  |
| C | 3.152997  | 0.652335  | 0.125661  |
| H | 3.133325  | 0.742148  | 1.215904  |
| C | 3.804824  | -0.666701 | -0.252945 |
| C | 3.050022  | -1.831253 | 0.386079  |
| C | 1.560994  | -1.653614 | 0.342207  |
| O | -0.709807 | 3.195547  | 0.501971  |
| O | -4.627837 | -0.139048 | -0.145306 |
| O | -3.076364 | 2.275901  | 0.243889  |
| H | -0.931986 | -2.501685 | -0.399625 |
| O | -3.692468 | -2.212806 | -0.407117 |
| H | 1.657297  | 2.750496  | 0.115704  |
| H | 0.982628  | -2.518281 | 0.646468  |
| O | 3.409656  | -1.973706 | 1.757277  |
| H | 4.835799  | -0.675186 | 0.119976  |
| H | -2.340285 | 2.923798  | 0.388312  |
| C | -4.892159 | -1.535213 | -0.017637 |
| H | -5.107635 | -1.769780 | 1.027927  |
| H | -5.701102 | -1.817038 | -0.682911 |
| O | 3.786843  | -0.853933 | -1.656396 |
| H | 4.158831  | -0.059693 | -2.061256 |
| O | 3.830412  | 1.752922  | -0.466316 |
| H | 4.627346  | 1.946805  | 0.039903  |
| H | 1.772974  | 0.758216  | -1.495200 |
| H | 3.313528  | -2.738062 | -0.168301 |
| H | 4.286909  | -2.370591 | 1.805682  |

35

Energy: -1122.61694330

|   |           |           |           |
|---|-----------|-----------|-----------|
| C | -3.263962 | -0.046237 | -0.102909 |
| C | -2.490608 | 1.080771  | 0.075820  |
| C | -1.087258 | 0.888648  | 0.065459  |
| C | -0.524180 | -0.392561 | -0.078050 |
| C | -1.338095 | -1.513593 | -0.258466 |
| C | -2.697355 | -1.295834 | -0.262784 |
| C | -0.229419 | 2.078275  | 0.239736  |
| C | 0.947054  | -0.524149 | -0.019659 |
| C | 1.730498  | 0.704826  | -0.403987 |
| N | 1.091813  | 1.910483  | 0.107119  |
| C | 3.152635  | 0.653753  | 0.127893  |
| H | 3.127943  | 0.738447  | 1.218488  |
| C | 3.806926  | -0.663158 | -0.253732 |
| C | 3.050938  | -1.830532 | 0.378647  |
| C | 1.561919  | -1.653568 | 0.330396  |
| O | -0.711615 | 3.193321  | 0.503150  |
| O | -4.629113 | -0.148701 | -0.100516 |
| O | -3.076907 | 2.271993  | 0.251973  |
| H | -0.931255 | -2.502376 | -0.408735 |
| O | -3.691332 | -2.218810 | -0.387914 |
| H | 1.657499  | 2.750513  | 0.123486  |
| H | 0.983349  | -2.519983 | 0.629241  |
| O | 3.405972  | -1.977454 | 1.750502  |
| H | 4.836737  | -0.672039 | 0.122396  |
| H | -2.340111 | 2.917655  | 0.404619  |
| C | -4.879333 | -1.453961 | -0.619633 |
| H | -5.710879 | -1.905487 | -0.089379 |
| H | -5.054527 | -1.388867 | -1.696461 |
| O | 3.793607  | -0.845194 | -1.657912 |
| H | 4.167376  | -0.049725 | -2.058693 |
| O | 3.832269  | 1.757451  | -0.455626 |
| H | 4.627467  | 1.948507  | 0.054557  |
| H | 1.778671  | 0.763871  | -1.498277 |
| H | 3.316867  | -2.735215 | -0.178031 |
| H | 4.282174  | -2.376367 | 1.800711  |

35

Energy: -1122.61650390

|   |           |           |           |
|---|-----------|-----------|-----------|
| C | -3.262468 | -0.044071 | -0.057182 |
| C | -2.485206 | 1.084029  | 0.097136  |
| C | -1.082618 | 0.888598  | 0.079328  |
| C | -0.523725 | -0.394111 | -0.068544 |
| C | -1.341201 | -1.513598 | -0.242290 |
| C | -2.700002 | -1.294929 | -0.223558 |
| C | -0.220692 | 2.076666  | 0.245566  |
| C | 0.946631  | -0.530028 | -0.009290 |
| C | 1.731760  | 0.695142  | -0.402266 |
| N | 1.099745  | 1.904473  | 0.108732  |
| C | 3.158490  | 0.642898  | 0.116717  |
| H | 3.145602  | 0.741766  | 1.206103  |
| C | 3.805808  | -0.681391 | -0.254739 |
| C | 3.054855  | -1.833845 | 0.397133  |
| C | 1.561431  | -1.659596 | 0.341930  |
| O | -0.699088 | 3.194288  | 0.503866  |
| O | -4.625628 | -0.128942 | -0.147025 |
| O | -3.067979 | 2.281001  | 0.244948  |
| H | -0.936921 | -2.501741 | -0.403992 |
| O | -3.696116 | -2.205075 | -0.411480 |
| H | 1.666681  | 2.743838  | 0.114483  |
| H | 0.975136  | -2.525696 | 0.631591  |
| O | 3.518077  | -1.895768 | 1.745504  |
| H | 4.835638  | -0.694759 | 0.117439  |
| H | -2.330346 | 2.927018  | 0.389896  |
| C | -4.894272 | -1.524577 | -0.022153 |
| H | -5.111652 | -1.760321 | 1.022739  |
| H | -5.703275 | -1.802788 | -0.688863 |
| O | 3.778497  | -0.879991 | -1.656144 |
| H | 4.154606  | -0.091277 | -2.067658 |
| O | 3.837230  | 1.735626  | -0.488043 |
| H | 4.639151  | 1.928094  | 0.010883  |
| H | 1.770497  | 0.749388  | -1.497292 |
| H | 3.328899  | -2.751829 | -0.132933 |
| H | 3.015079  | -2.569231 | 2.216739  |

35

Energy: -1122.61646666

|   |           |           |           |
|---|-----------|-----------|-----------|
| C | -3.261439 | -0.037535 | -0.110687 |
| C | -2.484831 | 1.086752  | 0.071565  |
| C | -1.082087 | 0.890250  | 0.063243  |
| C | -0.522964 | -0.392504 | -0.082460 |
| C | -1.340036 | -1.510615 | -0.266574 |
| C | -2.698578 | -1.288506 | -0.273019 |
| C | -0.220813 | 2.077206  | 0.240243  |
| C | 0.947681  | -0.528313 | -0.020181 |
| C | 1.734327  | 0.698578  | -0.405181 |
| N | 1.100020  | 1.905729  | 0.107944  |
| C | 3.158435  | 0.644077  | 0.120993  |
| H | 3.139403  | 0.737081  | 1.210824  |
| C | 3.807951  | -0.678180 | -0.253678 |
| C | 3.054422  | -1.833759 | 0.389574  |
| C | 1.561291  | -1.659153 | 0.328724  |
| O | -0.700072 | 3.192963  | 0.505558  |
| O | -4.626749 | -0.135542 | -0.111006 |
| O | -3.067837 | 2.279242  | 0.249469  |
| H | -0.936447 | -2.500333 | -0.419519 |
| O | -3.695154 | -2.207950 | -0.402350 |
| H | 1.667965  | 2.744242  | 0.124808  |
| H | 0.973997  | -2.526626 | 0.612017  |
| O | 3.511627  | -1.902076 | 1.739598  |
| H | 4.836036  | -0.692754 | 0.123198  |
| H | -2.329521 | 2.922570  | 0.404562  |
| C | -4.880648 | -1.438912 | -0.633278 |
| H | -5.714041 | -1.888991 | -0.104671 |
| H | -5.054893 | -1.370849 | -1.710046 |
| O | 3.787190  | -0.870304 | -1.656088 |
| H | 4.165671  | -0.079959 | -2.062278 |
| O | 3.840681  | 1.739993  | -0.473893 |
| H | 4.640923  | 1.928381  | 0.029443  |
| H | 1.778299  | 0.757037  | -1.499771 |
| H | 3.330750  | -2.749231 | -0.143659 |
| H | 3.005268  | -2.576641 | 2.205590  |



35

Energy: -1122.61485940

|   |           |           |           |
|---|-----------|-----------|-----------|
| C | 3.310726  | -0.066248 | -0.062229 |
| C | 2.550304  | 1.074666  | -0.207278 |
| C | 1.149629  | 0.915331  | -0.074147 |
| C | 0.577507  | -0.352286 | 0.141259  |
| C | 1.372313  | -1.491110 | 0.268032  |
| C | 2.733357  | -1.301559 | 0.163644  |
| C | 0.295306  | 2.109637  | -0.234047 |
| C | -0.895906 | -0.424873 | 0.186336  |
| C | -1.545842 | 0.813765  | 0.753637  |
| N | -1.018848 | 1.970364  | 0.029023  |
| C | -3.074933 | 0.798797  | 0.714304  |
| H | -3.442706 | 1.824933  | 0.603136  |
| C | -3.608126 | -0.032592 | -0.438418 |
| C | -3.093716 | -1.459356 | -0.341812 |
| C | -1.593976 | -1.452800 | -0.290427 |
| O | 0.762174  | 3.198677  | -0.600558 |
| O | 4.669211  | -0.200212 | -0.175346 |
| O | 3.144485  | 2.246795  | -0.466897 |
| H | 0.948949  | -2.466897 | 0.456991  |
| O | 3.714824  | -2.243093 | 0.224314  |
| H | -1.087012 | -2.318795 | -0.703881 |
| O | -3.587974 | -2.131139 | -1.494837 |
| H | -3.260849 | 0.396174  | -1.385922 |
| C | 4.932972  | -1.500168 | 0.348537  |
| H | 5.711496  | -1.979459 | -0.235138 |
| H | 5.191919  | -1.420195 | 1.407394  |
| O | -5.020046 | 0.003724  | -0.354368 |
| H | -5.361226 | -0.672600 | -0.953827 |
| O | -3.514118 | 0.261732  | 1.949286  |
| H | -4.462967 | 0.098014  | 1.863706  |
| H | -1.265833 | 0.897641  | 1.810755  |
| H | -3.509338 | -1.919285 | 0.561097  |
| H | -3.582413 | -3.081242 | -1.338072 |
| H | 2.415877  | 2.902448  | -0.597861 |
| H | -1.543912 | 2.835604  | 0.055559  |

35

Energy: -1122.61484516

|   |           |           |           |
|---|-----------|-----------|-----------|
| C | 3.310234  | -0.061408 | -0.017666 |
| C | 2.551074  | 1.077310  | -0.185437 |
| C | 1.149328  | 0.919656  | -0.062268 |
| C | 0.576734  | -0.341968 | 0.184863  |
| C | 1.371459  | -1.475736 | 0.351751  |
| C | 2.732233  | -1.290316 | 0.239829  |
| C | 0.295002  | 2.107437  | -0.265594 |
| C | -0.896707 | -0.417469 | 0.209178  |
| C | -1.558131 | 0.835003  | 0.730654  |
| N | -1.022897 | 1.972127  | -0.018456 |
| C | -3.086454 | 0.814643  | 0.669092  |
| H | -3.454860 | 1.836032  | 0.522069  |
| C | -3.600786 | -0.052234 | -0.465981 |
| C | -3.083920 | -1.473912 | -0.319677 |
| C | -1.585109 | -1.461089 | -0.247322 |
| O | 0.765354  | 3.188362  | -0.650792 |
| O | 4.674851  | -0.177038 | -0.011559 |
| O | 3.148502  | 2.248515  | -0.442117 |
| H | 0.947241  | -2.444789 | 0.571345  |
| O | 3.717613  | -2.215604 | 0.403256  |
| H | -1.069935 | -2.336892 | -0.628607 |
| O | -3.559763 | -2.181307 | -1.459006 |
| H | -3.241233 | 0.349384  | -1.420773 |
| C | 4.904096  | -1.582546 | -0.089412 |
| H | 5.050302  | -1.870139 | -1.133699 |
| H | 5.746772  | -1.851622 | 0.538280  |
| O | -5.013864 | -0.017819 | -0.403139 |
| H | -5.344788 | -0.712569 | -0.987061 |
| O | -3.542511 | 0.313415  | 1.912991  |
| H | -4.489507 | 0.144131  | 1.818275  |
| H | -1.294465 | 0.949812  | 1.789066  |
| H | -3.511163 | -1.908072 | 0.590548  |
| H | -3.552781 | -3.126231 | -1.273799 |
| H | 2.421879  | 2.900965  | -0.595919 |
| H | -1.547802 | 2.837911  | -0.017331 |

## Excited state S1

35

|                |                |           |           |
|----------------|----------------|-----------|-----------|
| Energy TD-DFT: | -1122.48525389 |           |           |
| C              | 3.276443       | -0.040959 | 0.078685  |
| C              | 2.518286       | 1.147129  | -0.013706 |
| C              | 1.067037       | 0.935949  | -0.015087 |
| C              | 0.515863       | -0.373661 | 0.009723  |
| C              | 1.366869       | -1.540350 | 0.112262  |
| C              | 2.700598       | -1.337161 | 0.138361  |
| C              | 0.236306       | 2.041768  | -0.224344 |
| C              | -0.919830      | -0.527157 | -0.017486 |
| C              | -1.725851      | 0.723836  | 0.273313  |
| N              | -1.101746      | 1.884928  | -0.342755 |
| C              | -3.159877      | 0.626444  | -0.232541 |
| H              | -3.148550      | 0.621594  | -1.324938 |
| C              | -3.802091      | -0.649741 | 0.273565  |
| C              | -3.041335      | -1.880752 | -0.228163 |
| C              | -1.553479      | -1.709254 | -0.207069 |
| O              | 0.684997       | 3.284747  | -0.395321 |
| O              | 4.607828       | -0.133594 | 0.142801  |
| O              | 3.030922       | 2.296899  | -0.095274 |
| H              | 0.952594       | -2.532816 | 0.196079  |
| O              | 3.710682       | -2.237599 | 0.291340  |
| H              | -1.652258      | 2.734629  | -0.312263 |
| H              | -0.988098      | -2.609733 | -0.414124 |
| O              | -3.490751      | -2.247762 | -1.535223 |
| H              | -4.829029      | -0.706228 | -0.096039 |
| H              | 1.676975       | 3.225825  | -0.327234 |
| C              | 4.921421       | -1.532033 | 0.052591  |
| H              | 5.281774       | -1.739076 | -0.955940 |
| H              | 5.650999       | -1.783518 | 0.815883  |
| O              | -3.783019      | -0.557335 | 1.692273  |
| H              | -4.401613      | -1.195880 | 2.062570  |
| O              | -3.893273      | 1.771893  | 0.157688  |
| H              | -4.093338      | 1.670398  | 1.098773  |
| H              | -1.759186      | 0.854824  | 1.365271  |
| H              | -3.320173      | -2.724015 | 0.410313  |
| H              | -2.999142      | -1.732836 | -2.185961 |

35

Energy TD-DFT: -1122.48521966

|   |           |           |           |
|---|-----------|-----------|-----------|
| C | 3.276163  | -0.037603 | 0.110168  |
| C | 2.518044  | 1.148858  | -0.003321 |
| C | 1.067140  | 0.936502  | -0.012829 |
| C | 0.516087  | -0.373288 | 0.018288  |
| C | 1.367922  | -1.539163 | 0.124707  |
| C | 2.701265  | -1.334425 | 0.160064  |
| C | 0.236767  | 2.040995  | -0.229311 |
| C | -0.919232 | -0.527122 | -0.011305 |
| C | -1.725926 | 0.724888  | 0.273499  |
| N | -1.101222 | 1.884083  | -0.345406 |
| C | -3.159055 | 0.625441  | -0.234448 |
| H | -3.145747 | 0.615331  | -1.326783 |
| C | -3.802369 | -0.648156 | 0.276669  |
| C | -3.040999 | -1.881513 | -0.218351 |
| C | -1.553190 | -1.710056 | -0.196943 |
| O | 0.685448  | 3.283230  | -0.405439 |
| O | 4.608528  | -0.131535 | 0.145538  |
| O | 3.030734  | 2.297980  | -0.090877 |
| H | 0.955383  | -2.534081 | 0.183196  |
| O | 3.714366  | -2.241423 | 0.224427  |
| H | -1.651897 | 2.733797  | -0.319086 |
| H | -0.988251 | -2.611601 | -0.400167 |
| O | -3.489414 | -2.254486 | -1.524177 |
| H | -4.828690 | -0.706214 | -0.094382 |
| H | 1.677249  | 3.225149  | -0.335046 |
| C | 4.910630  | -1.503941 | 0.439854  |
| H | 5.684859  | -1.850737 | -0.237461 |
| H | 5.208173  | -1.573864 | 1.486855  |
| O | -3.785638 | -0.549006 | 1.694971  |
| H | -4.406320 | -1.184353 | 2.067265  |
| O | -3.892845 | 1.772880  | 0.149164  |
| H | -4.094308 | 1.675895  | 1.090433  |
| H | -1.761428 | 0.859958  | 1.364907  |
| H | -3.320602 | -2.721874 | 0.423616  |
| H | -2.997220 | -1.742289 | -2.176622 |

35

Energy TD-DFT: -1122.47796646

|   |           |           |           |
|---|-----------|-----------|-----------|
| C | -3.257957 | -0.046187 | -0.107367 |
| C | -2.479254 | 1.106649  | -0.003779 |
| C | -1.076383 | 0.927700  | 0.004594  |
| C | -0.496983 | -0.406391 | -0.020354 |
| C | -1.354134 | -1.568053 | -0.096160 |
| C | -2.682657 | -1.354641 | -0.139293 |
| C | -0.275018 | 2.084258  | 0.226330  |
| C | 0.912945  | -0.531520 | -0.014001 |
| C | 1.712439  | 0.733883  | -0.253062 |
| N | 1.066526  | 1.892076  | 0.339761  |
| C | 3.130638  | 0.635982  | 0.300473  |
| H | 3.083974  | 0.572985  | 1.390219  |
| C | 3.817790  | -0.597732 | -0.255114 |
| C | 3.067830  | -1.873566 | 0.141114  |
| C | 1.583228  | -1.727579 | 0.126138  |
| O | -0.776129 | 3.244214  | 0.372985  |
| O | -4.584375 | -0.132506 | -0.130812 |
| O | -3.032140 | 2.299619  | 0.086392  |
| H | -0.950842 | -2.567976 | -0.133363 |
| O | -3.703087 | -2.249001 | -0.188949 |
| H | 1.629058  | 2.733781  | 0.364833  |
| H | 1.034225  | -2.640405 | 0.322965  |
| O | 3.517805  | -2.336533 | 1.422097  |
| H | 4.830140  | -0.657049 | 0.151955  |
| H | -2.222241 | 2.936495  | 0.220443  |
| C | -4.904561 | -1.513710 | -0.367445 |
| H | -5.645802 | -1.832580 | 0.359277  |
| H | -5.254598 | -1.611991 | -1.395116 |
| O | 3.855543  | -0.418528 | -1.665410 |
| H | 4.517528  | -1.006706 | -2.043675 |
| O | 3.855593  | 1.811745  | -0.006609 |
| H | 4.091773  | 1.758384  | -0.943408 |
| H | 1.794622  | 0.867619  | -1.342647 |
| H | 3.370273  | -2.663379 | -0.554980 |
| H | 3.010481  | -1.882185 | 2.105830  |

35

Energy TD-DFT: -1122.47795413

|   |           |           |           |
|---|-----------|-----------|-----------|
| C | -3.260610 | -0.043762 | -0.069477 |
| C | -2.478494 | 1.111325  | -0.052330 |
| C | -1.075141 | 0.929702  | -0.052498 |
| C | -0.499230 | -0.404348 | 0.002995  |
| C | -1.359336 | -1.566462 | 0.004693  |
| C | -2.687884 | -1.353116 | -0.035975 |
| C | -0.270426 | 2.095171  | 0.094229  |
| C | 0.910946  | -0.532873 | 0.007925  |
| C | 1.713068  | 0.714075  | -0.307079 |
| N | 1.071124  | 1.907550  | 0.215911  |
| C | 3.131330  | 0.645550  | 0.251143  |
| H | 3.084421  | 0.645325  | 1.342731  |
| C | 3.816521  | -0.619089 | -0.232872 |
| C | 3.063088  | -1.869287 | 0.232650  |
| C | 1.578648  | -1.720730 | 0.210970  |
| O | -0.768719 | 3.263666  | 0.172198  |
| O | -4.586926 | -0.127696 | -0.094786 |
| O | -3.026755 | 2.309058  | -0.027025 |
| H | -0.958153 | -2.567895 | 0.007507  |
| O | -3.708734 | -2.246804 | -0.097573 |
| H | 1.635346  | 2.747974  | 0.186881  |
| H | 1.028258  | -2.620720 | 0.456854  |
| O | 3.511822  | -2.262633 | 1.537089  |
| H | 4.827932  | -0.657805 | 0.178930  |
| H | -2.211245 | 2.950592  | 0.056990  |
| C | -4.918500 | -1.518982 | 0.051724  |
| H | -5.325501 | -1.668839 | 1.051810  |
| H | -5.617868 | -1.798774 | -0.730512 |
| O | 3.857614  | -0.519135 | -1.650932 |
| H | 4.522731  | -1.125011 | -1.994159 |
| O | 3.858383  | 1.800325  | -0.122997 |
| H | 4.095342  | 1.692001  | -1.054857 |
| H | 1.795048  | 0.781902  | -1.402756 |
| H | 3.362822  | -2.696876 | -0.419212 |
| H | 3.006118  | -1.769734 | 2.194833  |

# Charged narciclasine

## Ground State

34

Energy: -1122.13154364

|   |           |           |           |
|---|-----------|-----------|-----------|
| C | 3.295892  | -0.081341 | -0.101256 |
| C | 2.530022  | 1.068146  | -0.341504 |
| C | 1.124859  | 0.859044  | -0.143612 |
| C | 0.579120  | -0.401812 | 0.151342  |
| C | 1.385959  | -1.522881 | 0.339325  |
| C | 2.746073  | -1.303763 | 0.208693  |
| C | 0.194198  | 1.980574  | -0.386605 |
| C | -0.894977 | -0.460696 | 0.188519  |
| C | -1.518727 | 0.825816  | 0.675533  |
| N | -1.048072 | 1.985302  | -0.081482 |
| C | -3.045532 | 0.791333  | 0.700829  |
| H | -3.409561 | 1.816383  | 0.590040  |
| C | -3.605698 | -0.056788 | -0.424466 |
| C | -3.102557 | -1.485623 | -0.311632 |
| C | -1.603267 | -1.500164 | -0.251182 |
| O | 0.725462  | 3.055872  | -0.976547 |
| O | 4.666655  | -0.217465 | -0.244237 |
| O | 3.024088  | 2.198962  | -0.724172 |
| H | 0.981337  | -2.494174 | 0.584901  |
| O | 3.750839  | -2.235186 | 0.308134  |
| H | -1.106773 | -2.394300 | -0.617063 |
| O | -3.604934 | -2.169104 | -1.459797 |
| H | -3.267464 | 0.353488  | -1.383408 |
| H | 1.748918  | 2.893415  | -0.981649 |
| C | 4.942020  | -1.450544 | 0.401096  |
| H | 5.754948  | -1.961344 | -0.104916 |
| H | 5.160574  | -1.268437 | 1.459067  |
| O | -5.021047 | -0.013814 | -0.330951 |
| H | -5.365552 | -0.700729 | -0.915833 |
| O | -3.455744 | 0.259482  | 1.956296  |
| H | -4.406806 | 0.101782  | 1.896045  |
| H | -1.210249 | 0.960094  | 1.723066  |
| H | -3.532531 | -1.931980 | 0.591817  |
| H | -3.561730 | -3.118598 | -1.305857 |

34

Energy: -1122.13141008

|   |           |           |           |
|---|-----------|-----------|-----------|
| C | 3.299958  | -0.064554 | 0.014753  |
| C | 2.543767  | 1.100021  | -0.178930 |
| C | 1.134339  | 0.888275  | -0.018450 |
| C | 0.580136  | -0.377424 | 0.237792  |
| C | 1.380704  | -1.505450 | 0.411838  |
| C | 2.742313  | -1.290627 | 0.294136  |
| C | 0.211632  | 2.018597  | -0.251780 |
| C | -0.894167 | -0.436597 | 0.233040  |
| C | -1.532049 | 0.838712  | 0.731425  |
| N | -1.038021 | 2.017348  | 0.020618  |
| C | -3.059216 | 0.805985  | 0.710128  |
| H | -3.418530 | 1.833431  | 0.606756  |
| C | -3.587303 | -0.021247 | -0.445765 |
| C | -3.087132 | -1.451941 | -0.344628 |
| C | -1.589937 | -1.467328 | -0.245825 |
| O | 0.760233  | 3.110444  | -0.793682 |
| O | 4.679785  | -0.175561 | 0.013161  |
| O | 3.050360  | 2.249440  | -0.482389 |
| H | 0.968811  | -2.480431 | 0.629426  |
| O | 3.747837  | -2.211084 | 0.467069  |
| H | -1.083483 | -2.353490 | -0.617186 |
| O | -3.559444 | -2.115433 | -1.516979 |
| H | -3.222606 | 0.405948  | -1.387465 |
| H | 1.783717  | 2.950641  | -0.762732 |
| C | 4.898832  | -1.573471 | -0.091368 |
| H | 4.976652  | -1.852975 | -1.147761 |
| H | 5.781239  | -1.854449 | 0.474563  |
| O | -5.004709 | 0.020360  | -0.391038 |
| H | -5.332375 | -0.657728 | -0.995590 |
| O | -3.507436 | 0.252836  | 1.943134  |
| H | -4.456225 | 0.096663  | 1.851109  |
| H | -1.255852 | 0.946287  | 1.790978  |
| H | -3.540289 | -1.913628 | 0.539574  |
| H | -3.519193 | -3.067426 | -1.378402 |



34

Energy: -1122.13109197

|   |           |           |           |
|---|-----------|-----------|-----------|
| C | -3.252315 | -0.063055 | -0.107817 |
| C | -2.540401 | 1.162857  | 0.024514  |
| C | -1.103424 | 0.941880  | 0.139341  |
| C | -0.528557 | -0.351483 | 0.010878  |
| C | -1.302622 | -1.492500 | -0.184267 |
| C | -2.673603 | -1.291727 | -0.228447 |
| C | -0.222897 | 2.096599  | 0.413092  |
| C | 0.943697  | -0.501320 | 0.075427  |
| C | 1.719742  | 0.718341  | -0.345366 |
| N | 1.121072  | 1.888986  | 0.262737  |
| C | 3.185820  | 0.656606  | 0.073810  |
| H | 3.243216  | 0.787325  | 1.156861  |
| C | 3.784873  | -0.684370 | -0.294763 |
| C | 3.048962  | -1.817200 | 0.426552  |
| C | 1.560118  | -1.632362 | 0.428387  |
| O | -0.605848 | 3.201824  | 0.793203  |
| O | -4.621341 | -0.180329 | -0.309418 |
| O | -3.138331 | 2.269113  | 0.016734  |
| H | -0.870059 | -2.469408 | -0.337275 |
| O | -3.643998 | -2.236132 | -0.476850 |
| H | 1.689906  | 2.724094  | 0.305382  |
| H | 0.981702  | -2.487226 | 0.760436  |
| O | 3.550691  | -1.971384 | 1.755066  |
| H | 4.835258  | -0.705196 | 0.007972  |
| C | -4.857325 | -1.565370 | -0.128489 |
| H | -5.075416 | -1.764083 | 0.927428  |
| H | -5.658129 | -1.897001 | -0.782111 |
| O | 3.667578  | -0.791436 | -1.707884 |
| H | 4.241424  | -1.497668 | -2.022642 |
| O | 3.912224  | 1.731246  | -0.494470 |
| H | 4.015962  | 1.533013  | -1.435146 |
| H | 1.680835  | 0.789297  | -1.441890 |
| H | 3.297981  | -2.752017 | -0.083309 |
| H | 3.067795  | -1.371474 | 2.335153  |

34

Energy: -1122.13065538

|   |           |           |           |
|---|-----------|-----------|-----------|
| C | -3.262823 | -0.022090 | -0.154528 |
| C | -2.548525 | 1.197909  | 0.018320  |
| C | -1.111880 | 0.969601  | 0.126773  |
| C | -0.546527 | -0.331464 | 0.030358  |
| C | -1.326949 | -1.470383 | -0.148904 |
| C | -2.695124 | -1.258345 | -0.225814 |
| C | -0.220150 | 2.120497  | 0.381483  |
| C | 0.925931  | -0.489179 | 0.082899  |
| C | 1.702575  | 0.715635  | -0.376996 |
| N | 1.120955  | 1.900563  | 0.219859  |
| C | 3.175994  | 0.653694  | 0.015500  |
| H | 3.255493  | 0.813475  | 1.093167  |
| C | 3.757955  | -0.701704 | -0.326565 |
| C | 3.027540  | -1.807329 | 0.441069  |
| C | 1.539718  | -1.614588 | 0.456943  |
| O | -0.589221 | 3.233660  | 0.751919  |
| O | -4.643945 | -0.145421 | -0.225226 |
| O | -3.147763 | 2.303026  | 0.055629  |
| H | -0.900798 | -2.454026 | -0.273312 |
| O | -3.678826 | -2.211415 | -0.367680 |
| H | 1.695779  | 2.732316  | 0.242192  |
| H | 0.960124  | -2.458063 | 0.815256  |
| O | 3.547675  | -1.920737 | 1.766595  |
| H | 4.813924  | -0.722253 | -0.043796 |
| C | -4.830104 | -1.451366 | -0.742988 |
| H | -5.719524 | -1.900636 | -0.311902 |
| H | -4.878311 | -1.407564 | -1.837316 |
| O | 3.612191  | -0.847991 | -1.733559 |
| H | 4.176375  | -1.565608 | -2.039774 |
| O | 3.899254  | 1.706645  | -0.595817 |
| H | 3.984317  | 1.481564  | -1.532299 |
| H | 1.642591  | 0.765042  | -1.473820 |
| H | 3.264901  | -2.759284 | -0.041946 |
| H | 3.072985  | -1.302820 | 2.334451  |

34

Energy: -1122.13021232

|   |           |           |           |
|---|-----------|-----------|-----------|
| C | 3.311375  | -0.077950 | 0.021982  |
| C | 2.616535  | 1.160272  | -0.098685 |
| C | 1.171037  | 0.967074  | -0.098814 |
| C | 0.587557  | -0.310340 | 0.122893  |
| C | 1.344294  | -1.463045 | 0.292957  |
| C | 2.720369  | -1.290021 | 0.224459  |
| C | 0.287837  | 2.116184  | -0.383803 |
| C | -0.887017 | -0.403997 | 0.151047  |
| C | -1.542692 | 0.842195  | 0.689129  |
| N | -1.057642 | 1.939542  | -0.133032 |
| C | -3.070054 | 0.801470  | 0.698709  |
| H | -3.457580 | 1.820039  | 0.581124  |
| C | -3.622258 | -0.057349 | -0.424062 |
| C | -3.081986 | -1.473023 | -0.322589 |
| C | -1.581636 | -1.444234 | -0.306157 |
| O | 0.653841  | 3.190616  | -0.852974 |
| O | 4.690692  | -0.220170 | 0.119525  |
| O | 3.232508  | 2.253420  | -0.172781 |
| H | 0.895797  | -2.423669 | 0.498836  |
| O | 3.688441  | -2.247640 | 0.424029  |
| H | -1.071802 | -2.307704 | -0.721523 |
| O | -3.597764 | -2.166219 | -1.457188 |
| H | -3.308723 | 0.362680  | -1.386771 |
| C | 4.883215  | -1.613854 | -0.039914 |
| H | 5.010400  | -1.846580 | -1.103790 |
| H | 5.727314  | -1.945974 | 0.556452  |
| O | -5.034591 | -0.043819 | -0.304143 |
| H | -5.375895 | -0.741867 | -0.877858 |
| O | -3.472041 | 0.278980  | 1.954992  |
| H | -4.418272 | 0.093252  | 1.890520  |
| H | -1.227352 | 0.977747  | 1.732526  |
| H | -3.474981 | -1.930815 | 0.591934  |
| H | -3.531795 | -3.114673 | -1.304766 |
| H | -1.577531 | 2.807203  | -0.116146 |

34

Energy: -1122.13004206

|   |           |           |           |
|---|-----------|-----------|-----------|
| C | -3.243981 | -0.045732 | -0.023788 |
| C | -2.483215 | 1.120094  | 0.133708  |
| C | -1.068863 | 0.880618  | 0.090617  |
| C | -0.516506 | -0.405771 | -0.002712 |
| C | -1.326855 | -1.536165 | -0.131733 |
| C | -2.688028 | -1.298567 | -0.140126 |
| C | -0.147716 | 2.026869  | 0.227364  |
| C | 0.956902  | -0.505637 | 0.059826  |
| C | 1.691213  | 0.729598  | -0.419760 |
| N | 1.112582  | 1.988472  | 0.036416  |
| C | 3.172838  | 0.706885  | -0.037348 |
| H | 3.258761  | 0.965234  | 1.020460  |
| C | 3.781690  | -0.664695 | -0.266353 |
| C | 3.073185  | -1.738592 | 0.558267  |
| C | 1.582385  | -1.602195 | 0.496346  |
| O | -0.715655 | 3.186301  | 0.579251  |
| O | -4.622932 | -0.155517 | 0.008310  |
| O | -2.994124 | 2.293603  | 0.313634  |
| H | -0.924660 | -2.532678 | -0.239174 |
| O | -3.694750 | -2.230391 | -0.218294 |
| H | 1.008941  | -2.449936 | 0.856544  |
| O | 3.542046  | -1.726417 | 1.908667  |
| H | 4.835300  | -0.638806 | 0.025821  |
| H | -1.737887 | 3.022626  | 0.538265  |
| C | -4.861243 | -1.456748 | -0.506358 |
| H | -5.721792 | -1.898666 | -0.014419 |
| H | -4.987202 | -1.401592 | -1.593149 |
| O | 3.660078  | -0.917708 | -1.663000 |
| H | 4.244164  | -1.643527 | -1.905769 |
| O | 3.908420  | 1.686391  | -0.747954 |
| H | 3.982309  | 1.365863  | -1.656635 |
| H | 1.645663  | 0.717648  | -1.519736 |
| H | 3.370159  | -2.714566 | 0.164496  |
| H | 3.042657  | -1.060771 | 2.395773  |

34

Energy: -1122.12999401

|   |           |           |           |
|---|-----------|-----------|-----------|
| C | -3.242967 | -0.033370 | -0.084989 |
| C | -2.480755 | 1.129961  | 0.083259  |
| C | -1.066955 | 0.886343  | 0.059106  |
| C | -0.516670 | -0.397922 | -0.069906 |
| C | -1.328346 | -1.521778 | -0.241989 |
| C | -2.688951 | -1.282504 | -0.242942 |
| C | -0.145131 | 2.025503  | 0.243944  |
| C | 0.954167  | -0.506445 | 0.023292  |
| C | 1.705151  | 0.740325  | -0.397671 |
| N | 1.118611  | 1.987867  | 0.078432  |
| C | 3.175734  | 0.699186  | 0.024568  |
| H | 3.233374  | 0.919748  | 1.092833  |
| C | 3.786855  | -0.665765 | -0.236340 |
| C | 3.053438  | -1.765683 | 0.529974  |
| C | 1.565185  | -1.620164 | 0.436714  |
| O | -0.717245 | 3.177762  | 0.612381  |
| O | -4.619227 | -0.122634 | -0.190418 |
| O | -2.990475 | 2.306381  | 0.248844  |
| H | -0.926562 | -2.514693 | -0.380541 |
| O | -3.695589 | -2.196935 | -0.441351 |
| H | 0.980532  | -2.476306 | 0.756544  |
| O | 3.488015  | -1.804759 | 1.891383  |
| H | 4.832022  | -0.654160 | 0.085372  |
| H | -1.738708 | 3.022693  | 0.530231  |
| C | -4.875027 | -1.508502 | -0.020126 |
| H | -5.045503 | -1.720263 | 1.041085  |
| H | -5.713661 | -1.809973 | -0.639504 |
| O | 3.703111  | -0.867850 | -1.643901 |
| H | 4.293297  | -1.585087 | -1.897060 |
| O | 3.933764  | 1.699855  | -0.630739 |
| H | 4.032030  | 1.410569  | -1.547573 |
| H | 1.690745  | 0.762019  | -1.498289 |
| H | 3.356576  | -2.728092 | 0.108513  |
| H | 2.982391  | -1.151201 | 2.388408  |

34

Energy: -1122.12987548

|   |           |           |           |
|---|-----------|-----------|-----------|
| C | 3.311991  | -0.081624 | -0.035036 |
| C | 2.616893  | 1.152162  | -0.201056 |
| C | 1.171242  | 0.966382  | -0.140658 |
| C | 0.590579  | -0.316804 | 0.059463  |
| C | 1.346726  | -1.473124 | 0.200256  |
| C | 2.723430  | -1.297627 | 0.139300  |
| C | 0.282987  | 2.127570  | -0.349861 |
| C | -0.883303 | -0.409343 | 0.118671  |
| C | -1.523780 | 0.814610  | 0.720313  |
| N | -1.057248 | 1.942736  | -0.070310 |
| C | -3.050395 | 0.772933  | 0.764444  |
| H | -3.440139 | 1.795481  | 0.701551  |
| C | -3.629112 | -0.035167 | -0.382342 |
| C | -3.089747 | -1.454491 | -0.355567 |
| C | -1.589245 | -1.428717 | -0.366710 |
| O | 0.638147  | 3.225289  | -0.770737 |
| O | 4.690465  | -0.245060 | -0.104874 |
| O | 3.236891  | 2.232382  | -0.369029 |
| H | 0.898143  | -2.437625 | 0.386520  |
| O | 3.691356  | -2.273094 | 0.218826  |
| H | -1.089152 | -2.275609 | -0.825966 |
| O | -3.628689 | -2.094957 | -1.510309 |
| H | -3.336202 | 0.427018  | -1.332114 |
| C | 4.893142  | -1.532749 | 0.448673  |
| H | 5.724823  | -2.025479 | -0.045403 |
| H | 5.047378  | -1.446350 | 1.530741  |
| O | -5.038509 | -0.025471 | -0.230576 |
| H | -5.394340 | -0.693888 | -0.830129 |
| O | -3.422551 | 0.194496  | 2.005491  |
| H | -4.370424 | 0.012763  | 1.956075  |
| H | -1.183500 | 0.909120  | 1.760513  |
| H | -3.466247 | -1.952750 | 0.544617  |
| H | -3.560083 | -3.049476 | -1.403507 |
| H | -1.566888 | 2.813078  | 0.009989  |

34

Energy: -1122.12983046

|   |           |           |           |
|---|-----------|-----------|-----------|
| C | 3.308043  | -0.070979 | -0.036750 |
| C | 2.528683  | 1.059823  | -0.201043 |
| C | 1.132145  | 0.873781  | -0.059990 |
| C | 0.584989  | -0.396085 | 0.153562  |
| C | 1.393318  | -1.530720 | 0.286346  |
| C | 2.750500  | -1.315377 | 0.193825  |
| C | 0.226988  | 2.054468  | -0.260216 |
| C | -0.888039 | -0.446150 | 0.182641  |
| C | -1.494675 | 0.817749  | 0.745858  |
| N | -1.029456 | 2.016012  | 0.050382  |
| C | -3.021675 | 0.785314  | 0.779659  |
| H | -3.381791 | 1.816828  | 0.739655  |
| C | -3.592201 | 0.016785  | -0.396317 |
| C | -3.102059 | -1.420843 | -0.378432 |
| C | -1.602893 | -1.452358 | -0.319206 |
| O | 0.792262  | 3.105689  | -0.765510 |
| O | 4.675656  | -0.192500 | -0.156523 |
| O | 3.045189  | 2.250721  | -0.501337 |
| H | 0.980885  | -2.513135 | 0.468137  |
| O | 3.756897  | -2.245491 | 0.253602  |
| H | -1.113874 | -2.326848 | -0.739414 |
| O | -3.610281 | -2.023074 | -1.569338 |
| H | -3.252071 | 0.485919  | -1.327038 |
| C | 4.947457  | -1.470803 | 0.406238  |
| H | 5.761789  | -1.944307 | -0.132203 |
| H | 5.163219  | -1.359086 | 1.473523  |
| O | -5.007745 | 0.065053  | -0.297709 |
| H | -5.358279 | -0.578100 | -0.926993 |
| O | -3.430345 | 0.171925  | 1.999296  |
| H | -4.382828 | 0.026183  | 1.933166  |
| H | -1.182174 | 0.879171  | 1.799925  |
| H | -3.536653 | -1.922428 | 0.493279  |
| H | -3.574593 | -2.980895 | -1.478128 |
| H | 2.163355  | 2.822998  | -0.682031 |

34

Energy: -1122.12974949

|   |           |           |           |
|---|-----------|-----------|-----------|
| C | 3.307445  | -0.060979 | 0.027468  |
| C | 2.529769  | 1.067012  | -0.161764 |
| C | 1.131815  | 0.882720  | -0.033790 |
| C | 0.583905  | -0.380611 | 0.214574  |
| C | 1.392186  | -1.509249 | 0.392709  |
| C | 2.749263  | -1.297580 | 0.295102  |
| C | 0.227788  | 2.055224  | -0.283028 |
| C | -0.888954 | -0.435898 | 0.215427  |
| C | -1.511954 | 0.843081  | 0.724437  |
| N | -1.033923 | 2.022072  | 0.005550  |
| C | -3.039546 | 0.807312  | 0.724124  |
| H | -3.400359 | 1.835653  | 0.637244  |
| C | -3.582177 | -0.006158 | -0.434684 |
| C | -3.087648 | -1.440029 | -0.353360 |
| C | -1.589801 | -1.462395 | -0.264839 |
| O | 0.800206  | 3.094833  | -0.803737 |
| O | 4.681510  | -0.161515 | 0.034878  |
| O | 3.050209  | 2.256323  | -0.463230 |
| H | 0.978540  | -2.484714 | 0.606758  |
| O | 3.760213  | -2.207788 | 0.474278  |
| H | -1.089185 | -2.348218 | -0.645644 |
| O | -3.570916 | -2.088890 | -1.530056 |
| H | -3.223995 | 0.429646  | -1.374803 |
| C | 4.916458  | -1.561830 | -0.061045 |
| H | 5.022159  | -1.840607 | -1.114293 |
| H | 5.788463  | -1.829748 | 0.526425  |
| O | -4.999635 | 0.039754  | -0.367843 |
| H | -5.334318 | -0.629264 | -0.978536 |
| O | -3.475151 | 0.239076  | 1.956137  |
| H | -4.425534 | 0.088037  | 1.873486  |
| H | -1.224658 | 0.937432  | 1.783245  |
| H | -3.537070 | -1.910140 | 0.528290  |
| H | -3.532263 | -3.042455 | -1.402415 |
| H | 2.172186  | 2.821615  | -0.675338 |



34

Energy: -1122.12788961

|   |           |           |           |
|---|-----------|-----------|-----------|
| C | -3.238346 | -0.049727 | -0.022880 |
| C | -2.458592 | 1.083320  | 0.122196  |
| C | -1.056588 | 0.873477  | 0.104686  |
| C | -0.508601 | -0.408645 | 0.015689  |
| C | -1.324815 | -1.540928 | -0.115845 |
| C | -2.680889 | -1.309902 | -0.135784 |
| C | -0.157941 | 2.062026  | 0.256185  |
| C | 0.963477  | -0.502421 | 0.075795  |
| C | 1.682797  | 0.738639  | -0.413441 |
| N | 1.114540  | 1.996589  | 0.057719  |
| C | 3.171475  | 0.713504  | -0.058067 |
| H | 3.274877  | 0.985597  | 0.994747  |
| C | 3.779694  | -0.660083 | -0.278384 |
| C | 3.084399  | -1.725724 | 0.567679  |
| C | 1.592862  | -1.595615 | 0.514842  |
| O | -0.754630 | 3.165395  | 0.598456  |
| O | -4.611980 | -0.151371 | -0.007101 |
| O | -2.978346 | 2.296515  | 0.288332  |
| H | -0.919929 | -2.537246 | -0.219032 |
| O | -3.691743 | -2.233796 | -0.219554 |
| H | 1.023726  | -2.443537 | 0.882182  |
| O | 3.564813  | -1.692166 | 1.913916  |
| H | 4.836899  | -0.628640 | 0.000498  |
| H | -2.086939 | 2.881152  | 0.467381  |
| C | -4.856316 | -1.459684 | -0.511125 |
| H | -5.716347 | -1.892312 | -0.010594 |
| H | -4.987504 | -1.411251 | -1.596722 |
| O | 3.642868  | -0.932695 | -1.670322 |
| H | 4.228113  | -1.658759 | -1.909465 |
| O | 3.899913  | 1.682352  | -0.792375 |
| H | 3.950928  | 1.353294  | -1.699434 |
| H | 1.620783  | 0.717840  | -1.513578 |
| H | 3.382548  | -2.705997 | 0.185651  |
| H | 3.068215  | -1.019540 | 2.394229  |

34

Energy: -1122.12786964

|   |           |           |           |
|---|-----------|-----------|-----------|
| C | -3.246825 | -0.055141 | -0.109697 |
| C | -2.468595 | 1.065621  | 0.116179  |
| C | -1.066890 | 0.854369  | 0.112370  |
| C | -0.518229 | -0.418374 | -0.065034 |
| C | -1.332616 | -1.535623 | -0.298263 |
| C | -2.688340 | -1.303613 | -0.312125 |
| C | -0.170662 | 2.025849  | 0.373432  |
| C | 0.950951  | -0.522806 | 0.029451  |
| C | 1.687396  | 0.749228  | -0.340770 |
| N | 1.106372  | 1.970764  | 0.203778  |
| C | 3.163760  | 0.690520  | 0.060087  |
| H | 3.233259  | 0.876204  | 1.134290  |
| C | 3.776854  | -0.663265 | -0.250872 |
| C | 3.054195  | -1.790392 | 0.485312  |
| C | 1.565163  | -1.649893 | 0.399337  |
| O | -0.774680 | 3.104290  | 0.776554  |
| O | -4.616056 | -0.134518 | -0.232553 |
| O | -2.990250 | 2.270222  | 0.333702  |
| H | -0.925517 | -2.520509 | -0.476244 |
| O | -3.695306 | -2.201306 | -0.563926 |
| H | 0.984025  | -2.520891 | 0.684595  |
| O | 3.493846  | -1.866628 | 1.843791  |
| H | 4.824841  | -0.658250 | 0.062251  |
| H | -2.104526 | 2.837863  | 0.577807  |
| C | -4.881942 | -1.529655 | -0.138249 |
| H | -5.082096 | -1.790676 | 0.905729  |
| H | -5.705010 | -1.792527 | -0.794547 |
| O | 3.683278  | -0.822361 | -1.663744 |
| H | 4.275158  | -1.528596 | -1.942539 |
| O | 3.917315  | 1.712364  | -0.569448 |
| H | 3.996436  | 1.457927  | -1.498244 |
| H | 1.662215  | 0.811823  | -1.440746 |
| H | 3.361839  | -2.738279 | 0.035154  |
| H | 2.986866  | -1.229520 | 2.360377  |

## Excited state S1

34

Energy TD-DFT: -1122.01192818

|   |           |           |           |
|---|-----------|-----------|-----------|
| C | 3.276222  | -0.046361 | 0.130469  |
| C | 2.504764  | 1.154939  | 0.211826  |
| C | 1.055181  | 0.966167  | -0.017883 |
| C | 0.492858  | -0.340445 | -0.032543 |
| C | 1.359584  | -1.515557 | -0.028574 |
| C | 2.699476  | -1.317106 | 0.043892  |
| C | 0.241968  | 2.109512  | -0.385245 |
| C | -0.924564 | -0.523535 | -0.056776 |
| C | -1.715055 | 0.735357  | 0.206584  |
| N | -1.109488 | 1.840111  | -0.513998 |
| C | -3.173254 | 0.619298  | -0.215210 |
| H | -3.223971 | 0.591214  | -1.305918 |
| C | -3.786642 | -0.649829 | 0.339811  |
| C | -3.052272 | -1.881436 | -0.195418 |
| C | -1.568650 | -1.728581 | -0.194438 |
| O | 0.656981  | 3.243336  | -0.676458 |
| O | 4.605198  | -0.170271 | 0.395545  |
| O | 3.035443  | 2.240287  | 0.503983  |
| H | 0.950203  | -2.513878 | -0.029304 |
| O | 3.693348  | -2.254925 | 0.186934  |
| H | -1.679171 | 2.674698  | -0.576648 |
| H | -1.009573 | -2.640956 | -0.357255 |
| O | -3.560556 | -2.179190 | -1.514504 |
| H | -4.832327 | -0.707384 | 0.024423  |
| C | 4.908388  | -1.523699 | 0.057204  |
| H | 5.247497  | -1.559996 | -0.982008 |
| H | 5.648267  | -1.914541 | 0.748036  |
| O | -3.705113 | -0.544280 | 1.757547  |
| H | -4.268296 | -1.216482 | 2.155076  |
| O | -3.902989 | 1.767939  | 0.189313  |
| H | -4.015528 | 1.699865  | 1.147223  |
| H | -1.697373 | 0.930334  | 1.292709  |
| H | -3.350362 | -2.739917 | 0.415581  |
| H | -2.940213 | -1.801110 | -2.148718 |

|                |                |           |           |
|----------------|----------------|-----------|-----------|
| Energy TD-DFT: | -1122.01177832 |           |           |
| C              | 3.281785       | -0.000495 | 0.171829  |
| C              | 2.509268       | 1.202672  | 0.181252  |
| C              | 1.060668       | 0.999427  | -0.040854 |
| C              | 0.508212       | -0.311946 | -0.023732 |
| C              | 1.381419       | -1.483447 | -0.002808 |
| C              | 2.717361       | -1.275840 | 0.089509  |
| C              | 0.232892       | 2.131919  | -0.409586 |
| C              | -0.908250      | -0.508108 | -0.036715 |
| C              | -1.710487      | 0.747823  | 0.202691  |
| N              | -1.116388      | 1.844522  | -0.539407 |
| C              | -3.167483      | 0.608435  | -0.216078 |
| H              | -3.217588      | 0.552012  | -1.305752 |
| C              | -3.769271      | -0.651338 | 0.371859  |
| C              | -3.024149      | -1.889799 | -0.131887 |
| C              | -1.542071      | -1.721268 | -0.146365 |
| O              | 0.629226       | 3.273845  | -0.694072 |
| O              | 4.627170       | -0.103611 | 0.329428  |
| O              | 3.042904       | 2.305109  | 0.395895  |
| H              | 0.978581       | -2.483898 | -0.026496 |
| O              | 3.733088       | -2.201203 | 0.142562  |
| H              | -1.692415      | 2.674748  | -0.603837 |
| H              | -0.976812      | -2.632218 | -0.294564 |
| O              | -3.536457      | -2.233242 | -1.437832 |
| H              | -4.814545      | -0.726738 | 0.059014  |
| C              | 4.853728       | -1.479821 | 0.643783  |
| H              | 5.759625       | -1.820209 | 0.152858  |
| H              | 4.902553       | -1.588709 | 1.730968  |
| O              | -3.687995      | -0.508427 | 1.786433  |
| H              | -4.246626      | -1.173777 | 2.201504  |
| O              | -3.907406      | 1.760461  | 0.159213  |
| H              | -4.020416      | 1.715198  | 1.118408  |
| H              | -1.695069      | 0.963985  | 1.284787  |
| H              | -3.308355      | -2.732944 | 0.506631  |
| H              | -2.926043      | -1.865072 | -2.087345 |

34

Energy TD-DFT: -1122.00728172

|   |           |           |           |
|---|-----------|-----------|-----------|
| C | 3.353274  | -0.073104 | 0.040986  |
| C | 2.637042  | 1.151898  | 0.182071  |
| C | 1.164944  | 1.014616  | 0.056098  |
| C | 0.567569  | -0.276472 | 0.103832  |
| C | 1.383134  | -1.479844 | 0.018547  |
| C | 2.729942  | -1.329525 | -0.020759 |
| C | 0.367203  | 2.168728  | -0.283207 |
| C | -0.859615 | -0.394580 | 0.166496  |
| C | -1.533526 | 0.898054  | 0.579248  |
| N | -1.013869 | 1.946195  | -0.287719 |
| C | -3.062235 | 0.870779  | 0.548502  |
| H | -3.433740 | 1.863854  | 0.269215  |
| C | -3.597511 | -0.138488 | -0.448361 |
| C | -3.073522 | -1.527907 | -0.130067 |
| C | -1.578682 | -1.519868 | -0.107377 |
| O | 0.786317  | 3.285937  | -0.635371 |
| O | 4.693618  | -0.246604 | 0.206311  |
| O | 3.218647  | 2.220334  | 0.445030  |
| H | 0.932045  | -2.460655 | 0.048739  |
| O | 3.703888  | -2.298344 | 0.037538  |
| H | -1.092070 | -2.446578 | -0.387594 |
| O | -3.603525 | -2.375752 | -1.156287 |
| H | -3.259045 | 0.134505  | -1.454527 |
| C | 4.925800  | -1.601437 | -0.178403 |
| H | 5.179266  | -1.627240 | -1.242093 |
| H | 5.706572  | -2.027434 | 0.443232  |
| O | -5.014017 | -0.098875 | -0.367325 |
| H | -5.342601 | -0.888120 | -0.817177 |
| O | -3.516305 | 0.546867  | 1.855527  |
| H | -4.459258 | 0.349226  | 1.779383  |
| H | -1.253600 | 1.103582  | 1.624829  |
| H | -3.502972 | -1.840914 | 0.831067  |
| H | -3.516899 | -3.293279 | -0.877683 |
| H | -1.527250 | 2.818829  | -0.275595 |

34

Energy TD-DFT: -1122.00720960

|   |           |           |           |
|---|-----------|-----------|-----------|
| C | 3.355632  | -0.046042 | 0.006766  |
| C | 2.639342  | 1.177862  | 0.157397  |
| C | 1.165955  | 1.037817  | 0.053336  |
| C | 0.575953  | -0.257631 | 0.073901  |
| C | 1.392801  | -1.456935 | -0.055563 |
| C | 2.737804  | -1.302009 | -0.093330 |
| C | 0.355253  | 2.198598  | -0.229788 |
| C | -0.850785 | -0.385712 | 0.147534  |
| C | -1.527236 | 0.886613  | 0.614408  |
| N | -1.025490 | 1.967276  | -0.222580 |
| C | -3.056113 | 0.850657  | 0.601565  |
| H | -3.436509 | 1.851142  | 0.363830  |
| C | -3.598042 | -0.123954 | -0.425684 |
| C | -3.061323 | -1.520849 | -0.167103 |
| C | -1.566400 | -1.503121 | -0.162740 |
| O | 0.759126  | 3.333749  | -0.539153 |
| O | 4.704554  | -0.207051 | 0.051974  |
| O | 3.225967  | 2.249678  | 0.396524  |
| H | 0.941183  | -2.437522 | -0.078363 |
| O | 3.722133  | -2.259492 | -0.180035 |
| H | -1.078273 | -2.413927 | -0.488562 |
| O | -3.598007 | -2.332034 | -1.218967 |
| H | -3.274488 | 0.188975  | -1.425111 |
| C | 4.901730  | -1.605559 | 0.274048  |
| H | 5.756067  | -1.947590 | -0.300987 |
| H | 5.026424  | -1.776798 | 1.347044  |
| O | -5.013621 | -0.097230 | -0.325173 |
| H | -5.342944 | -0.870451 | -0.801555 |
| O | -3.492184 | 0.475775  | 1.901054  |
| H | -4.434835 | 0.275159  | 1.828819  |
| H | -1.235567 | 1.057579  | 1.662936  |
| H | -3.476528 | -1.873863 | 0.786382  |
| H | -3.501105 | -3.259057 | -0.977755 |
| H | -1.540860 | 2.837036  | -0.166044 |

Energy TD-DFT: -1122.00079966

|   |           |           |           |
|---|-----------|-----------|-----------|
| C | 2.736086  | 0.343705  | 0.122944  |
| C | 1.958903  | 1.446368  | -0.025543 |
| C | 0.553918  | 1.228494  | -0.235780 |
| C | -0.016596 | -0.096639 | -0.217862 |
| C | 0.856450  | -1.215783 | -0.056426 |
| C | 2.179061  | -0.955471 | 0.102333  |
| C | -0.284999 | 2.338310  | -0.506356 |
| C | -1.436166 | -0.245240 | -0.259153 |
| C | -2.202866 | 1.099758  | -0.025698 |
| N | -1.576339 | 2.004040  | -0.910575 |
| C | -3.693042 | 0.985628  | -0.314089 |
| H | -3.832422 | 0.968903  | -1.396515 |
| C | -4.270864 | -0.281022 | 0.283158  |
| C | -3.619125 | -1.520404 | -0.330574 |
| C | -2.138719 | -1.397940 | -0.444181 |
| O | 0.065597  | 3.552732  | -0.454012 |
| O | 4.091440  | 0.249209  | 0.374013  |
| O | 2.462925  | 2.696222  | 0.001203  |
| H | 0.481176  | -2.228458 | -0.020719 |
| O | 3.195472  | -1.849684 | 0.327268  |
| H | -1.604413 | -2.306479 | -0.703055 |
| O | -4.238987 | -1.779245 | -1.607389 |
| H | -5.343440 | -0.313867 | 0.070896  |
| H | 1.685373  | 3.300521  | -0.145049 |
| C | 4.391040  | -1.108676 | 0.086571  |
| H | 4.664051  | -1.207712 | -0.968738 |
| H | 5.174867  | -1.460522 | 0.749361  |
| O | -4.050090 | -0.190306 | 1.687602  |
| H | -4.575813 | -0.862657 | 2.133042  |
| O | -4.383353 | 2.128808  | 0.164938  |
| H | -4.421490 | 2.045022  | 1.127065  |
| H | -2.048682 | 1.361850  | 1.035619  |
| H | -3.890211 | -2.382970 | 0.287712  |
| H | -3.664263 | -1.398710 | -2.281564 |

34

Energy TD-DFT: -1122.00067280

|   |           |           |           |
|---|-----------|-----------|-----------|
| C | 3.247991  | -0.020602 | 0.164192  |
| C | 2.480976  | 1.091761  | 0.033142  |
| C | 1.069583  | 0.891638  | -0.147747 |
| C | 0.484642  | -0.427431 | -0.132872 |
| C | 1.347997  | -1.557648 | 0.007900  |
| C | 2.675717  | -1.312850 | 0.145823  |
| C | 0.238138  | 2.012571  | -0.396944 |
| C | -0.936496 | -0.560006 | -0.143494 |
| C | -1.683588 | 0.791184  | 0.113700  |
| N | -1.065089 | 1.695937  | -0.776043 |
| C | -3.180124 | 0.695755  | -0.147417 |
| H | -3.339825 | 0.686430  | -1.227131 |
| C | -3.761719 | -0.567101 | 0.454047  |
| C | -3.135158 | -1.811084 | -0.176658 |
| C | -1.656193 | -1.704246 | -0.319813 |
| O | 0.604736  | 3.221965  | -0.351035 |
| O | 4.621195  | -0.137103 | 0.264201  |
| O | 3.004800  | 2.333475  | 0.025251  |
| H | 0.961712  | -2.565984 | 0.045968  |
| O | 3.693532  | -2.223772 | 0.275962  |
| H | -1.137661 | -2.617141 | -0.594981 |
| O | -3.783200 | -2.058622 | -1.441887 |
| H | -4.838142 | -0.586770 | 0.260381  |
| H | 2.231307  | 2.947557  | -0.099551 |
| C | 4.811121  | -1.462800 | 0.734453  |
| H | 5.724761  | -1.872772 | 0.316289  |
| H | 4.817331  | -1.466968 | 1.828897  |
| O | -3.515851 | -0.485226 | 1.854905  |
| H | -4.042482 | -1.152864 | 2.306331  |
| O | -3.847827 | 1.844438  | 0.350221  |
| H | -3.869349 | 1.755762  | 1.312423  |
| H | -1.506756 | 1.044076  | 1.173844  |
| H | -3.403549 | -2.672999 | 0.443766  |
| H | -3.217143 | -1.682555 | -2.125861 |



|                |                |           |           |
|----------------|----------------|-----------|-----------|
| Energy TD-DFT: | -1121.99783556 |           |           |
| C              | 3.332587       | -0.045647 | 0.099763  |
| C              | 2.588508       | 1.086702  | 0.027608  |
| C              | 1.163155       | 0.922278  | -0.074652 |
| C              | 0.554183       | -0.381948 | -0.007349 |
| C              | 1.388566       | -1.534336 | 0.061528  |
| C              | 2.730174       | -1.325215 | 0.110807  |
| C              | 0.341432       | 2.058065  | -0.265476 |
| C              | -0.875752      | -0.461364 | 0.042265  |
| C              | -1.528860      | 0.903553  | 0.466532  |
| N              | -1.012033      | 1.781457  | -0.511599 |
| C              | -3.054196      | 0.883264  | 0.524735  |
| H              | -3.418506      | 1.887866  | 0.287863  |
| C              | -3.663542      | -0.098427 | -0.455437 |
| C              | -3.150821      | -1.503141 | -0.198342 |
| C              | -1.656388      | -1.523456 | -0.269885 |
| O              | 0.730782       | 3.263824  | -0.232562 |
| O              | 4.700442       | -0.191966 | 0.237204  |
| O              | 3.136037       | 2.319653  | 0.026374  |
| H              | 0.973827       | -2.531228 | 0.118353  |
| O              | 3.730651       | -2.257765 | 0.243707  |
| H              | -1.199980      | -2.437161 | -0.638512 |
| O              | -3.756753      | -2.313417 | -1.213438 |
| H              | -3.380785      | 0.189207  | -1.474549 |
| C              | 4.924970       | -1.554809 | -0.092815 |
| H              | 5.100359       | -1.645705 | -1.169615 |
| H              | 5.751629       | -1.943411 | 0.493003  |
| O              | -5.072772      | -0.034306 | -0.289230 |
| H              | -5.441132      | -0.808924 | -0.733578 |
| O              | -3.424129      | 0.537110  | 1.853383  |
| H              | -4.374347      | 0.362474  | 1.838545  |
| H              | -1.157946      | 1.125599  | 1.480059  |
| H              | -3.531906      | -1.833832 | 0.776467  |
| H              | -3.652299      | -3.239838 | -0.973358 |
| H              | 2.371025       | 2.950411  | -0.054524 |

34

Energy TD-DFT: -1121.99765597

|   |           |           |           |
|---|-----------|-----------|-----------|
| C | 3.338076  | -0.029480 | -0.002981 |
| C | 2.590352  | 1.102896  | -0.023950 |
| C | 1.163797  | 0.938878  | -0.100973 |
| C | 0.558763  | -0.368956 | -0.075648 |
| C | 1.397284  | -1.521326 | -0.062405 |
| C | 2.738676  | -1.309995 | -0.026847 |
| C | 0.335643  | 2.078674  | -0.233614 |
| C | -0.868681 | -0.454778 | 0.004384  |
| C | -1.514923 | 0.890271  | 0.496594  |
| N | -1.022785 | 1.807951  | -0.457058 |
| C | -3.038559 | 0.864082  | 0.588804  |
| H | -3.409618 | 1.875946  | 0.397866  |
| C | -3.668303 | -0.081941 | -0.413257 |
| C | -3.146794 | -1.493784 | -0.220875 |
| C | -1.654658 | -1.507175 | -0.329140 |
| O | 0.724195  | 3.283002  | -0.172758 |
| O | 4.712598  | -0.176443 | -0.016152 |
| O | 3.138194  | 2.335623  | -0.022817 |
| H | 0.985549  | -2.520572 | -0.033859 |
| O | 3.745738  | -2.244837 | -0.019527 |
| H | -1.205160 | -2.404962 | -0.742629 |
| O | -3.775740 | -2.267757 | -1.250344 |
| H | -3.409501 | 0.244741  | -1.426948 |
| C | 4.908099  | -1.523693 | 0.386027  |
| H | 5.781093  | -1.931997 | -0.112839 |
| H | 4.993005  | -1.572382 | 1.476387  |
| O | -5.073502 | -0.028257 | -0.212687 |
| H | -5.450149 | -0.786662 | -0.677626 |
| O | -3.377796 | 0.467985  | 1.911693  |
| H | -4.327716 | 0.291146  | 1.911636  |
| H | -1.121198 | 1.073059  | 1.509443  |
| H | -3.504001 | -1.861327 | 0.749791  |
| H | -3.665752 | -3.202002 | -1.045758 |
| H | 2.371406  | 2.967734  | -0.063059 |

34

Energy TD-DFT: -1121.99756684

|   |           |           |           |
|---|-----------|-----------|-----------|
| C | 3.264390  | -0.033998 | 0.162680  |
| C | 2.494065  | 1.158799  | 0.047823  |
| C | 1.039318  | 0.966730  | 0.042246  |
| C | 0.483576  | -0.339502 | 0.054398  |
| C | 1.347156  | -1.509657 | 0.151137  |
| C | 2.688419  | -1.307943 | 0.205427  |
| C | 0.148042  | 2.056706  | -0.274254 |
| C | -0.932288 | -0.493640 | -0.035365 |
| C | -1.711251 | 0.769008  | 0.289571  |
| N | -1.135694 | 1.973633  | -0.288704 |
| C | -3.179553 | 0.668828  | -0.119994 |
| H | -3.245487 | 0.773879  | -1.205378 |
| C | -3.778470 | -0.666362 | 0.286206  |
| C | -3.041936 | -1.834684 | -0.366843 |
| C | -1.562043 | -1.684225 | -0.303190 |
| O | 0.681339  | 3.249929  | -0.660922 |
| O | 4.615198  | -0.136681 | 0.200652  |
| O | 3.034501  | 2.288584  | -0.057064 |
| H | 0.930234  | -2.504932 | 0.198694  |
| O | 3.702770  | -2.233605 | 0.276870  |
| H | -0.986291 | -2.571294 | -0.540455 |
| O | -3.513337 | -1.979997 | -1.725301 |
| H | -4.824426 | -0.693889 | -0.033567 |
| H | 1.651811  | 3.186500  | -0.535452 |
| C | 4.859202  | -1.482088 | 0.627423  |
| H | 5.726037  | -1.874751 | 0.106554  |
| H | 4.985687  | -1.485830 | 1.713428  |
| O | -3.702131 | -0.718351 | 1.709377  |
| H | -4.262576 | -1.433726 | 2.027175  |
| O | -3.949740 | 1.725784  | 0.431786  |
| H | -4.029423 | 1.535774  | 1.375810  |
| H | -1.703377 | 0.877090  | 1.390347  |
| H | -3.359970 | -2.756796 | 0.131519  |
| H | -2.895606 | -1.500530 | -2.289729 |

34

Energy TD-DFT: -1121.99745677

|   |           |           |           |
|---|-----------|-----------|-----------|
| C | 3.273000  | -0.052399 | 0.117178  |
| C | 2.503812  | 1.140531  | -0.002144 |
| C | 1.048168  | 0.953243  | 0.016721  |
| C | 0.490773  | -0.351663 | 0.065413  |
| C | 1.351263  | -1.518503 | 0.212173  |
| C | 2.693926  | -1.320353 | 0.235015  |
| C | 0.157787  | 2.035140  | -0.327411 |
| C | -0.925186 | -0.507781 | -0.021432 |
| C | -1.706581 | 0.764059  | 0.260557  |
| N | -1.126147 | 1.952713  | -0.343845 |
| C | -3.171203 | 0.650671  | -0.159523 |
| H | -3.226374 | 0.718616  | -1.248485 |
| C | -3.775188 | -0.669929 | 0.285792  |
| C | -3.032527 | -1.860571 | -0.318354 |
| C | -1.553175 | -1.707226 | -0.247793 |
| O | 0.692098  | 3.217874  | -0.744467 |
| O | 4.619356  | -0.146488 | 0.244641  |
| O | 3.045459  | 2.268081  | -0.123803 |
| H | 0.930572  | -2.504775 | 0.343420  |
| O | 3.700945  | -2.231252 | 0.453165  |
| H | -0.974417 | -2.601784 | -0.447452 |
| O | -3.491880 | -2.054883 | -1.674717 |
| H | -4.817272 | -0.708059 | -0.045296 |
| H | 1.662108  | 3.158310  | -0.614453 |
| C | 4.895339  | -1.543981 | 0.099347  |
| H | 5.139193  | -1.744052 | -0.947633 |
| H | 5.696572  | -1.826403 | 0.774022  |
| O | -3.715903 | -0.673205 | 1.710758  |
| H | -4.280431 | -1.377373 | 2.045943  |
| O | -3.946864 | 1.725619  | 0.347951  |
| H | -4.034599 | 1.568945  | 1.297363  |
| H | -1.709067 | 0.901206  | 1.358213  |
| H | -3.354585 | -2.764281 | 0.210117  |
| H | -2.869757 | -1.595275 | -2.250696 |

34

Energy TD-DFT: -1121.99600430

|   |           |           |           |
|---|-----------|-----------|-----------|
| C | 3.332901  | -0.076942 | 0.002084  |
| C | 2.594746  | 1.136313  | -0.021725 |
| C | 1.132707  | 0.986338  | 0.090358  |
| C | 0.554699  | -0.313025 | 0.143464  |
| C | 1.381129  | -1.503820 | 0.118934  |
| C | 2.729096  | -1.341835 | 0.061425  |
| C | 0.250676  | 2.090116  | -0.171674 |
| C | -0.874531 | -0.408010 | 0.161657  |
| C | -1.527259 | 0.870857  | 0.655577  |
| N | -1.040148 | 2.038629  | -0.064457 |
| C | -3.055550 | 0.834098  | 0.648043  |
| H | -3.417087 | 1.852641  | 0.480084  |
| C | -3.598367 | -0.067254 | -0.442640 |
| C | -3.089989 | -1.487574 | -0.263678 |
| C | -1.595581 | -1.499245 | -0.219675 |
| O | 0.771425  | 3.263867  | -0.632929 |
| O | 4.680731  | -0.217288 | -0.074319 |
| O | 3.148958  | 2.257697  | -0.150227 |
| H | 0.932163  | -2.486185 | 0.166934  |
| O | 3.723758  | -2.292563 | 0.016884  |
| H | -1.107256 | -2.402852 | -0.569690 |
| O | -3.615071 | -2.223753 | -1.376284 |
| H | -3.253579 | 0.301262  | -1.416028 |
| H | 1.746373  | 3.184080  | -0.578734 |
| C | 4.919048  | -1.577474 | 0.304710  |
| H | 5.738657  | -1.977990 | -0.282444 |
| H | 5.118824  | -1.610191 | 1.379365  |
| O | -5.017047 | -0.028541 | -0.367475 |
| H | -5.344938 | -0.764398 | -0.900398 |
| O | -3.501236 | 0.366192  | 1.919234  |
| H | -4.447163 | 0.190683  | 1.832218  |
| H | -1.246328 | 0.979577  | 1.718492  |
| H | -3.534443 | -1.892008 | 0.655777  |
| H | -3.534667 | -3.165024 | -1.191159 |

34

Energy TD-DFT: -1121.99586191

|   |           |           |           |
|---|-----------|-----------|-----------|
| C | 3.330968  | -0.089038 | 0.052701  |
| C | 2.596576  | 1.125339  | 0.002601  |
| C | 1.132772  | 0.982118  | 0.105372  |
| C | 0.551368  | -0.314986 | 0.176191  |
| C | 1.375196  | -1.506711 | 0.208566  |
| C | 2.724055  | -1.349730 | 0.156834  |
| C | 0.257341  | 2.082275  | -0.188763 |
| C | -0.878404 | -0.408072 | 0.178554  |
| C | -1.537379 | 0.883181  | 0.631660  |
| N | -1.035812 | 2.034278  | -0.103869 |
| C | -3.065780 | 0.848733  | 0.598475  |
| H | -3.421630 | 1.862250  | 0.392460  |
| C | -3.591911 | -0.084631 | -0.473387 |
| C | -3.088016 | -1.499468 | -0.245173 |
| C | -1.594439 | -1.510237 | -0.177848 |
| O | 0.787075  | 3.246164  | -0.665340 |
| O | 4.681070  | -0.228203 | 0.079023  |
| O | 3.154875  | 2.244189  | -0.131944 |
| H | 0.924693  | -2.483858 | 0.314931  |
| O | 3.719191  | -2.294118 | 0.273517  |
| H | -1.100677 | -2.424428 | -0.491307 |
| O | -3.596100 | -2.267289 | -1.344216 |
| H | -3.231222 | 0.254978  | -1.451507 |
| H | 1.760816  | 3.166716  | -0.592968 |
| C | 4.900709  | -1.624594 | -0.148124 |
| H | 5.052691  | -1.783722 | -1.219355 |
| H | 5.745033  | -1.959253 | 0.445229  |
| O | -5.011551 | -0.042804 | -0.422422 |
| H | -5.331606 | -0.794185 | -0.938179 |
| O | -3.535211 | 0.421565  | 1.875427  |
| H | -4.479778 | 0.244779  | 1.776841  |
| H | -1.274717 | 1.013006  | 1.697069  |
| H | -3.546754 | -1.877260 | 0.678560  |
| H | -3.521093 | -3.202839 | -1.130079 |

# Triacetyl-narciclasine

## Ground State

50

Energy: -1580.58203455

|   |           |           |           |
|---|-----------|-----------|-----------|
| C | -4.764749 | 0.014762  | 0.136885  |
| C | -4.013327 | -1.025339 | -0.368165 |
| C | -2.607562 | -0.859919 | -0.331836 |
| C | -2.022231 | 0.313986  | 0.176126  |
| C | -2.811965 | 1.340630  | 0.697799  |
| C | -4.175086 | 1.152891  | 0.652513  |
| C | -1.771414 | -1.953871 | -0.863288 |
| C | -0.552021 | 0.445154  | 0.120332  |
| C | 0.219872  | -0.851807 | 0.116854  |
| N | -0.441594 | -1.843180 | -0.719691 |
| C | 1.632352  | -0.644811 | -0.401493 |
| H | 1.608702  | -0.401734 | -1.466114 |
| C | 2.312433  | 0.490836  | 0.341123  |
| C | 1.555318  | 1.791088  | 0.086491  |
| C | 0.067705  | 1.624935  | 0.090792  |
| O | -2.271719 | -2.941522 | -1.423303 |
| O | -6.122471 | 0.083819  | 0.285423  |
| O | -4.623750 | -2.116262 | -0.848398 |
| H | -2.385067 | 2.230853  | 1.135141  |
| O | -5.148078 | 1.976170  | 1.130631  |
| H | 0.098541  | -2.660325 | -0.977602 |
| H | -0.504292 | 2.544391  | 0.064305  |
| H | 3.347412  | 0.592411  | 0.022458  |
| H | -3.906043 | -2.702119 | -1.196921 |
| C | -6.369187 | 1.455513  | 0.593232  |
| H | -6.610640 | 1.995885  | -0.325378 |
| H | -7.154224 | 1.528038  | 1.338090  |
| O | 2.265637  | 0.249601  | 1.749686  |
| O | 2.310863  | -1.884876 | -0.199912 |
| H | 0.281227  | -1.228771 | 1.145039  |
| C | 3.322813  | -0.376769 | 2.311571  |
| O | 4.281904  | -0.735235 | 1.680074  |
| C | 3.487158  | -2.049746 | -0.847750 |
| O | 3.908934  | -1.240604 | -1.631043 |
| C | 3.123625  | -0.547984 | 3.784637  |
| H | 4.002400  | -1.013324 | 4.219338  |
| H | 2.940417  | 0.422369  | 4.244553  |
| H | 2.245487  | -1.170682 | 3.956824  |
| C | 4.154049  | -3.324809 | -0.444808 |
| H | 4.977101  | -3.536559 | -1.120286 |
| H | 4.532996  | -3.195934 | 0.570270  |
| H | 3.437126  | -4.143777 | -0.440087 |
| H | 1.861349  | 2.517379  | 0.840709  |
| O | 1.914716  | 2.292837  | -1.213941 |
| C | 3.083316  | 2.963021  | -1.306517 |
| O | 3.803474  | 3.144038  | -0.359574 |
| C | 3.341927  | 3.413255  | -2.710308 |
| H | 2.475463  | 3.948999  | -3.094653 |
| H | 3.499861  | 2.535736  | -3.338388 |
| H | 4.223561  | 4.045978  | -2.732477 |

50

Energy: -1580.58198184

|   |           |           |           |
|---|-----------|-----------|-----------|
| C | -4.605722 | 1.426273  | 0.322222  |
| C | -4.144145 | 0.397979  | -0.471947 |
| C | -2.750730 | 0.148820  | -0.429804 |
| C | -1.889758 | 0.938443  | 0.353593  |
| C | -2.390469 | 1.972194  | 1.147668  |
| C | -3.750651 | 2.181096  | 1.101601  |
| C | -2.224179 | -0.957044 | -1.253120 |
| C | -0.440206 | 0.656776  | 0.303408  |
| C | -0.061629 | -0.758374 | -0.060437 |
| N | -0.926052 | -1.268086 | -1.115432 |
| C | 1.378731  | -0.832632 | -0.536369 |
| H | 1.482052  | -0.324265 | -1.497589 |
| C | 2.306885  | -0.170365 | 0.465330  |
| C | 1.957647  | 1.310665  | 0.580631  |
| C | 0.484740  | 1.577521  | 0.574210  |
| O | -2.947593 | -1.578299 | -2.047109 |
| O | -5.885106 | 1.894231  | 0.444272  |
| O | -5.002897 | -0.295971 | -1.229578 |
| H | -1.756197 | 2.567740  | 1.787038  |
| O | -4.471678 | 3.133898  | 1.753280  |
| H | -0.619658 | -2.104832 | -1.597021 |
| H | 0.194418  | 2.594952  | 0.806332  |
| H | 3.345000  | -0.287138 | 0.162495  |
| H | -4.456581 | -0.944070 | -1.741362 |
| O | 2.117471  | -0.745900 | 1.760470  |
| O | 1.672553  | -2.221896 | -0.686126 |
| H | -0.164420 | -1.391276 | 0.829434  |
| C | 2.925622  | -1.769721 | 2.113157  |
| O | 3.779418  | -2.208596 | 1.388217  |
| C | 2.789607  | -2.538151 | -1.380899 |
| O | 3.462036  | -1.706478 | -1.930730 |
| C | 2.606561  | -2.254044 | 3.492482  |
| H | 3.296437  | -3.044712 | 3.769398  |
| H | 2.675130  | -1.425636 | 4.196555  |
| H | 1.582016  | -2.626107 | 3.512754  |
| C | 3.051925  | -4.008809 | -1.345836 |
| H | 3.818114  | -4.261206 | -2.072309 |
| H | 3.397124  | -4.261465 | -0.342035 |
| H | 2.135899  | -4.563196 | -1.541388 |
| H | 2.412801  | 1.698487  | 1.493018  |
| O | 2.512479  | 2.010155  | -0.548454 |
| C | 3.825059  | 2.321181  | -0.487296 |
| O | 4.515299  | 2.036472  | 0.456421  |
| C | 4.273923  | 3.030437  | -1.726525 |
| H | 3.614433  | 3.871890  | -1.932833 |
| H | 4.212214  | 2.341093  | -2.569384 |
| H | 5.297591  | 3.368756  | -1.601050 |
| C | -5.838795 | 2.738198  | 1.594773  |
| H | -6.147347 | 2.168921  | 2.474973  |
| H | -6.454118 | 3.616018  | 1.429658  |



50

Energy: -1580.58158409

|   |           |           |           |
|---|-----------|-----------|-----------|
| C | -4.588943 | 0.270499  | -0.214277 |
| C | -3.801087 | 1.223030  | 0.396645  |
| C | -2.403753 | 0.996021  | 0.366078  |
| C | -1.862685 | -0.152542 | -0.239857 |
| C | -2.688096 | -1.088988 | -0.865671 |
| C | -4.041752 | -0.841954 | -0.824215 |
| C | -1.529679 | 1.994317  | 1.012650  |
| C | -0.401043 | -0.356928 | -0.174871 |
| C | 0.424089  | 0.899856  | -0.043498 |
| N | -0.203458 | 1.834178  | 0.880413  |
| C | 1.826135  | 0.594039  | 0.453753  |
| H | 1.794340  | 0.273961  | 1.497386  |
| C | 2.457352  | -0.511346 | -0.375154 |
| C | 1.647548  | -1.790526 | -0.220627 |
| C | 0.164829  | -1.561717 | -0.250726 |
| O | -1.995412 | 2.946864  | 1.656744  |
| O | -5.945333 | 0.278724  | -0.387622 |
| O | -4.370939 | 2.292214  | 0.967335  |
| H | -2.293584 | -1.955083 | -1.375835 |
| O | -5.041825 | -1.571470 | -1.390474 |
| H | 0.367740  | 2.598194  | 1.221098  |
| H | -0.445585 | -2.452378 | -0.329463 |
| H | 3.484593  | -0.685574 | -0.062987 |
| H | -3.635043 | 2.808516  | 1.381219  |
| C | -6.248283 | -1.045519 | -0.825966 |
| H | -6.532608 | -1.656427 | 0.034266  |
| H | -7.020760 | -1.011256 | -1.586597 |
| O | 2.419638  | -0.158805 | -1.760332 |
| O | 2.554293  | 1.817330  | 0.340271  |
| H | 0.504796  | 1.368233  | -1.032214 |
| C | 3.498154  | 0.471375  | -2.274996 |
| O | 4.474400  | 0.735844  | -1.623706 |
| C | 3.736935  | 1.888817  | 0.993507  |
| O | 4.127205  | 1.009768  | 1.715007  |
| C | 3.297195  | 0.778305  | -3.725603 |
| H | 3.053404  | -0.136411 | -4.264355 |
| H | 2.455382  | 1.463110  | -3.831494 |
| H | 4.197396  | 1.229121  | -4.130745 |
| C | 4.453762  | 3.161960  | 0.679883  |
| H | 4.836525  | 3.085554  | -0.339109 |
| H | 3.768202  | 4.006066  | 0.724786  |
| H | 5.278551  | 3.297201  | 1.372723  |
| H | 1.936027  | -2.491578 | -1.004866 |
| O | 2.048256  | -2.334143 | 1.053860  |
| C | 1.799382  | -3.640771 | 1.261437  |
| O | 1.266256  | -4.337648 | 0.437070  |
| C | 2.263406  | -4.076239 | 2.616670  |
| H | 2.104317  | -5.143921 | 2.729617  |
| H | 1.704372  | -3.532441 | 3.378258  |
| H | 3.318184  | -3.833890 | 2.739552  |

50

Energy: -1580.58154117

|   |           |           |           |
|---|-----------|-----------|-----------|
| C | -4.570941 | -0.374723 | 0.310656  |
| C | -3.778242 | -1.280716 | -0.361441 |
| C | -2.384301 | -1.031847 | -0.341272 |
| C | -1.853076 | 0.102671  | 0.298779  |
| C | -2.684621 | 1.000997  | 0.970701  |
| C | -4.033303 | 0.724599  | 0.951667  |
| C | -1.504178 | -1.990669 | -1.037289 |
| C | -0.394399 | 0.328550  | 0.228528  |
| C | 0.445834  | -0.911007 | 0.040200  |
| N | -0.179042 | -1.817361 | -0.912804 |
| C | 1.838079  | -0.567089 | -0.459810 |
| H | 1.790215  | -0.206862 | -1.489659 |
| C | 2.464176  | 0.513434  | 0.404827  |
| C | 1.635933  | 1.786547  | 0.309240  |
| C | 0.156735  | 1.536759  | 0.345830  |
| O | -1.964152 | -2.921384 | -1.716675 |
| O | -5.934214 | -0.358522 | 0.419162  |
| O | -4.341045 | -2.320760 | -0.989690 |
| H | -2.298493 | 1.858855  | 1.500593  |
| O | -5.042963 | 1.453376  | 1.501247  |
| H | 0.399396  | -2.556775 | -1.293167 |
| H | -0.463938 | 2.415548  | 0.466709  |
| H | 3.485387  | 0.713660  | 0.088550  |
| H | -3.602042 | -2.805987 | -1.435149 |
| C | -6.190541 | 0.598307  | 1.446880  |
| H | -7.067491 | 1.183045  | 1.191806  |
| H | -6.294134 | 0.082684  | 2.404754  |
| O | 2.446981  | 0.106401  | 1.775399  |
| O | 2.583468  | -1.783885 | -0.402482 |
| H | 0.543575  | -1.415892 | 1.009195  |
| C | 3.539332  | -0.529430 | 2.252641  |
| O | 4.511418  | -0.754552 | 1.580680  |
| C | 3.759461  | -1.813664 | -1.070839 |
| O | 4.130019  | -0.901722 | -1.761228 |
| C | 3.359420  | -0.895613 | 3.692202  |
| H | 3.111263  | -0.005841 | 4.269380  |
| H | 2.527125  | -1.594372 | 3.780655  |
| H | 4.269727  | -1.350796 | 4.068881  |
| C | 4.496096  | -3.088615 | -0.816028 |
| H | 4.890813  | -3.046844 | 0.200413  |
| H | 3.820703  | -3.939222 | -0.885498 |
| H | 5.313676  | -3.185964 | -1.523621 |
| H | 1.923640  | 2.460131  | 1.117483  |
| O | 2.015606  | 2.385145  | -0.946895 |
| C | 1.747403  | 3.695472  | -1.100223 |
| O | 1.213767  | 4.351969  | -0.243685 |
| C | 2.191475  | 4.190179  | -2.441720 |
| H | 2.017647  | 5.259308  | -2.510658 |
| H | 1.631304  | 3.669617  | -3.218558 |
| H | 3.247881  | 3.966661  | -2.584686 |

# Tetraacetyl-narciclasine

## Ground State

55

Energy: -1733.21845319

|   |           |           |           |
|---|-----------|-----------|-----------|
| C | 4.200863  | -0.927398 | 0.554104  |
| C | 3.632713  | 0.281598  | 0.256607  |
| C | 2.235347  | 0.337970  | 0.086664  |
| C | 1.464367  | -0.821956 | 0.253198  |
| C | 2.061876  | -2.049121 | 0.584123  |
| C | 3.424272  | -2.068059 | 0.712469  |
| C | 1.586971  | 1.627008  | -0.303000 |
| C | -0.000903 | -0.735507 | 0.089591  |
| C | -0.593145 | 0.621284  | 0.376571  |
| N | 0.239786  | 1.659966  | -0.206714 |
| C | -1.992227 | 0.739967  | -0.202703 |
| H | -1.943705 | 0.763632  | -1.293738 |
| C | -2.849526 | -0.440087 | 0.216421  |
| C | -2.251911 | -1.727592 | -0.344036 |
| C | -0.758456 | -1.777003 | -0.252385 |
| O | 2.217268  | 2.596236  | -0.707342 |
| O | 5.504253  | -1.213206 | 0.810618  |
| O | 4.435495  | 1.397792  | 0.210367  |
| H | 1.473489  | -2.937386 | 0.761630  |
| O | 4.229663  | -3.102176 | 1.071221  |
| H | -0.185988 | 2.565022  | -0.362689 |
| H | -0.306901 | -2.734226 | -0.483390 |
| H | -3.870565 | -0.317338 | -0.137754 |
| C | 5.564533  | -2.643789 | 0.834175  |
| H | 5.900625  | -3.005318 | -0.139503 |
| H | 6.208768  | -2.966110 | 1.644984  |
| O | -2.847093 | -0.564966 | 1.640842  |
| O | -2.519829 | 1.973132  | 0.287479  |
| H | -0.655206 | 0.757787  | 1.463276  |
| C | -3.843469 | 0.040836  | 2.323017  |
| O | -4.714478 | 0.672865  | 1.785343  |
| C | -3.630040 | 2.447605  | -0.322181 |
| O | -4.107974 | 1.919374  | -1.291263 |
| C | -3.701517 | -0.188181 | 3.794919  |
| H | -4.535342 | 0.269973  | 4.317002  |
| H | -3.667764 | -1.258054 | 3.997279  |
| H | -2.761360 | 0.246320  | 4.135293  |
| C | -4.153482 | 3.662642  | 0.372713  |
| H | -3.340824 | 4.348970  | 0.603141  |
| H | -4.901827 | 4.145223  | -0.248288 |
| H | -4.605524 | 3.339794  | 1.311894  |
| H | -2.694996 | -2.569907 | 0.188965  |
| O | -2.590277 | -1.830508 | -1.739103 |
| C | -3.827215 | -2.284691 | -2.034299 |
| O | -4.622807 | -2.595946 | -1.186832 |
| C | -4.051702 | -2.326698 | -3.513478 |
| H | -5.012354 | -2.786638 | -3.722423 |
| H | -3.248308 | -2.882313 | -3.994764 |
| H | -4.034934 | -1.308154 | -3.902636 |
| C | 4.815427  | 1.834801  | -1.028447 |
| O | 4.647593  | 1.180132  | -2.016421 |
| C | 5.449429  | 3.181665  | -0.936360 |
| H | 5.923799  | 3.430094  | -1.880500 |
| H | 6.172514  | 3.204564  | -0.122926 |
| H | 4.660145  | 3.900710  | -0.713230 |

55

Energy: -1733.21829020

|   |           |           |           |
|---|-----------|-----------|-----------|
| C | 4.208543  | -0.947342 | 0.504727  |
| C | 3.642496  | 0.267749  | 0.228331  |
| C | 2.243007  | 0.332314  | 0.074140  |
| C | 1.471533  | -0.831084 | 0.212826  |
| C | 2.069265  | -2.068043 | 0.505415  |
| C | 3.431036  | -2.089706 | 0.639670  |
| C | 1.592252  | 1.636753  | -0.255898 |
| C | 0.004493  | -0.738905 | 0.064298  |
| C | -0.586592 | 0.608075  | 0.395247  |
| N | 0.245215  | 1.665451  | -0.154238 |
| C | -1.985932 | 0.745253  | -0.179381 |
| H | -1.937917 | 0.798216  | -1.269401 |
| C | -2.844999 | -0.444036 | 0.208631  |
| C | -2.249810 | -1.716999 | -0.386682 |
| C | -0.755920 | -1.769281 | -0.304020 |
| O | 2.220034  | 2.624520  | -0.617054 |
| O | 5.521876  | -1.256649 | 0.663914  |
| O | 4.454334  | 1.376893  | 0.177476  |
| H | 1.482121  | -2.962913 | 0.649907  |
| O | 4.243300  | -3.148468 | 0.895643  |
| H | -0.179201 | 2.577439  | -0.268103 |
| H | -0.306897 | -2.719772 | -0.565615 |
| H | -3.866155 | -0.310473 | -0.141208 |
| C | 5.523150  | -2.584613 | 1.200156  |
| H | 6.300829  | -3.168340 | 0.719518  |
| H | 5.644381  | -2.534248 | 2.283728  |
| O | -2.841995 | -0.606933 | 1.629256  |
| O | -2.510391 | 1.966056  | 0.343841  |
| H | -0.648303 | 0.709694  | 1.485819  |
| C | -3.836260 | -0.016500 | 2.327773  |
| O | -4.705386 | 0.632463  | 1.807486  |
| C | -3.620450 | 2.458377  | -0.251902 |
| O | -4.100799 | 1.956091  | -1.233486 |
| C | -3.695000 | -0.285619 | 3.792942  |
| H | -4.526857 | 0.161758  | 4.327364  |
| H | -3.665777 | -1.360710 | 3.966312  |
| H | -2.753006 | 0.135624  | 4.144709  |
| C | -4.140232 | 3.656515  | 0.474320  |
| H | -3.326114 | 4.336824  | 0.717200  |
| H | -4.890996 | 4.154119  | -0.131729 |
| H | -4.588142 | 3.311721  | 1.407644  |
| H | -2.690551 | -2.572414 | 0.127145  |
| O | -2.594588 | -1.785528 | -1.782296 |
| C | -3.832789 | -2.232603 | -2.082835 |
| O | -4.625340 | -2.562157 | -1.239424 |
| C | -4.062627 | -2.242526 | -3.561753 |
| H | -5.025781 | -2.694332 | -3.776845 |
| H | -3.263141 | -2.791402 | -4.057140 |
| H | -4.042900 | -1.216321 | -3.929969 |
| C | 4.785430  | 1.846340  | -1.063345 |
| O | 4.569670  | 1.221877  | -2.061579 |
| C | 5.437280  | 3.183822  | -0.959931 |
| H | 5.870642  | 3.456561  | -1.916980 |
| H | 6.197280  | 3.174785  | -0.180563 |
| H | 4.667017  | 3.903040  | -0.678731 |

55

Energy: -1733.21825591

|   |           |           |           |
|---|-----------|-----------|-----------|
| C | 4.236733  | -1.094077 | 0.146810  |
| C | 3.678569  | 0.062413  | -0.327688 |
| C | 2.271210  | 0.158173  | -0.361113 |
| C | 1.489490  | -0.910179 | 0.103602  |
| C | 2.081322  | -2.078923 | 0.610722  |
| C | 3.447645  | -2.142419 | 0.602718  |
| C | 1.619734  | 1.372570  | -0.939887 |
| C | 0.017481  | -0.797076 | 0.053788  |
| C | -0.518042 | 0.611238  | 0.096798  |
| N | 0.285514  | 1.473018  | -0.753819 |
| C | -1.957983 | 0.662353  | -0.384054 |
| H | -2.000676 | 0.453474  | -1.455385 |
| C | -2.804126 | -0.366938 | 0.342169  |
| C | -2.285338 | -1.766444 | 0.024363  |
| C | -0.791213 | -1.855021 | 0.000732  |
| O | 2.235504  | 2.226050  | -1.566806 |
| O | 5.550782  | -1.390618 | 0.327711  |
| O | 4.528359  | 1.037200  | -0.792569 |
| H | 1.489176  | -2.885395 | 1.017433  |
| O | 4.255187  | -3.126570 | 1.078170  |
| H | -0.126203 | 2.350914  | -1.044922 |
| H | -0.384496 | -2.856863 | -0.063483 |
| H | -3.848125 | -0.280896 | 0.049540  |
| C | 5.569145  | -2.791557 | 0.620702  |
| H | 5.783063  | -3.347830 | -0.294006 |
| H | 6.289170  | -2.987797 | 1.407610  |
| O | -2.684834 | -0.188512 | 1.755775  |
| O | -2.413409 | 1.991585  | -0.129288 |
| H | -0.484922 | 0.972553  | 1.132059  |
| C | -3.605692 | 0.587739  | 2.367896  |
| O | -4.504482 | 1.126436  | 1.776944  |
| C | -3.559390 | 2.371697  | -0.738793 |
| O | -4.129680 | 1.670617  | -1.532447 |
| C | -3.345164 | 0.669375  | 3.839102  |
| H | -2.367014 | 1.121204  | 4.004913  |
| H | -4.117797 | 1.266048  | 4.313192  |
| H | -3.326051 | -0.333913 | 4.263204  |
| C | -3.993107 | 3.726905  | -0.282384 |
| H | -4.783211 | 4.095112  | -0.929475 |
| H | -4.366345 | 3.630862  | 0.738423  |
| H | -3.148578 | 4.413477  | -0.273784 |
| H | -2.697188 | -2.458380 | 0.760287  |
| O | -2.747589 | -2.149737 | -1.283694 |
| C | -4.013903 | -2.610034 | -1.372268 |
| O | -4.737889 | -2.704162 | -0.415682 |
| C | -4.367798 | -2.958022 | -2.784323 |
| H | -3.620595 | -3.633601 | -3.197874 |
| H | -4.365227 | -2.047458 | -3.384295 |
| H | -5.351787 | -3.415321 | -2.810344 |
| C | 4.542068  | 2.237805  | -0.140120 |
| O | 3.999837  | 2.401075  | 0.914850  |
| C | 5.313968  | 3.247591  | -0.920462 |
| H | 4.711912  | 3.520123  | -1.788513 |
| H | 6.249736  | 2.819254  | -1.274939 |
| H | 5.498636  | 4.123390  | -0.306463 |

55

Energy: -1733.21806035

|   |           |           |           |
|---|-----------|-----------|-----------|
| C | 4.230989  | -1.112520 | 0.105699  |
| C | 3.674221  | 0.047439  | -0.361629 |
| C | 2.267017  | 0.147426  | -0.390214 |
| C | 1.483697  | -0.927394 | 0.056489  |
| C | 2.073990  | -2.106912 | 0.540008  |
| C | 3.440643  | -2.167130 | 0.542946  |
| C | 1.617194  | 1.377067  | -0.938171 |
| C | 0.011535  | -0.806140 | 0.020392  |
| C | -0.516252 | 0.603562  | 0.098476  |
| N | 0.284891  | 1.479625  | -0.739663 |
| C | -1.959778 | 0.672900  | -0.369155 |
| H | -2.012382 | 0.488848  | -1.444589 |
| C | -2.805432 | -0.368259 | 0.340528  |
| C | -2.296458 | -1.762844 | -0.012853 |
| C | -0.803029 | -1.858474 | -0.049641 |
| O | 2.231764  | 2.240547  | -1.552421 |
| O | 5.545128  | -1.444902 | 0.202560  |
| O | 4.524328  | 1.018392  | -0.834642 |
| H | 1.480905  | -2.924997 | 0.921099  |
| O | 4.245185  | -3.189805 | 0.933136  |
| H | -0.125113 | 2.364940  | -1.009914 |
| H | -0.402169 | -2.860869 | -0.137589 |
| H | -3.851333 | -0.270489 | 0.058565  |
| C | 5.565186  | -2.639642 | 0.991649  |
| H | 6.271208  | -3.343799 | 0.564455  |
| H | 5.801510  | -2.383584 | 2.025948  |
| O | -2.673819 | -0.222279 | 1.756764  |
| O | -2.405928 | 1.998349  | -0.080382 |
| H | -0.472791 | 0.941802  | 1.141121  |
| C | -3.585658 | 0.544625  | 2.393632  |
| O | -4.486866 | 1.100341  | 1.822442  |
| C | -3.554458 | 2.398436  | -0.671992 |
| O | -4.134900 | 1.718643  | -1.476719 |
| C | -3.312213 | 0.592677  | 3.863984  |
| H | -2.331629 | 1.038739  | 4.031125  |
| H | -4.079189 | 1.180336  | 4.358092  |
| H | -3.291587 | -0.419786 | 4.265534  |
| C | -3.976913 | 3.745266  | -0.181434 |
| H | -4.770464 | 4.132196  | -0.813185 |
| H | -4.341930 | 3.628257  | 0.840153  |
| H | -3.128581 | 4.426980  | -0.164678 |
| H | -2.706398 | -2.469092 | 0.710458  |
| O | -2.770753 | -2.114207 | -1.325530 |
| C | -4.040477 | -2.564997 | -1.414452 |
| O | -4.757762 | -2.675855 | -0.454619 |
| C | -4.407321 | -2.878932 | -2.831139 |
| H | -3.668483 | -3.551053 | -3.264896 |
| H | -4.401812 | -1.955351 | -3.410864 |
| H | -5.395047 | -3.327932 | -2.859947 |
| C | 4.564723  | 2.210024  | -0.167361 |
| O | 4.044077  | 2.365730  | 0.899634  |
| C | 5.333877  | 3.220961  | -0.948971 |
| H | 4.718151  | 3.513489  | -1.800764 |
| H | 6.256705  | 2.785957  | -1.328332 |
| H | 5.542062  | 4.085577  | -0.326685 |

55

Energy: -1733.21784169

|   |           |           |           |
|---|-----------|-----------|-----------|
| C | -4.114584 | 0.917015  | 0.298457  |
| C | -3.541002 | -0.178288 | -0.289437 |
| C | -2.132800 | -0.240227 | -0.351053 |
| C | -1.365369 | 0.796267  | 0.201226  |
| C | -1.972142 | 1.900909  | 0.821639  |
| C | -3.339421 | 1.934997  | 0.839353  |
| C | -1.465838 | -1.380991 | -1.049762 |
| C | 0.107849  | 0.715647  | 0.125996  |
| C | 0.661877  | -0.683910 | 0.046876  |
| N | -0.129063 | -1.476578 | -0.879712 |
| C | 2.106168  | -0.684805 | -0.423825 |
| H | 2.157309  | -0.411271 | -1.479936 |
| C | 2.931913  | 0.309258  | 0.373951  |
| C | 2.397007  | 1.715744  | 0.146500  |
| C | 0.898139  | 1.788386  | 0.160158  |
| O | -2.071650 | -2.178142 | -1.755413 |
| O | -5.431148 | 1.166201  | 0.526040  |
| O | -4.378489 | -1.124468 | -0.829935 |
| H | -1.389403 | 2.678309  | 1.293380  |
| O | -4.158692 | 2.851858  | 1.418029  |
| H | 0.295714  | -2.315459 | -1.254785 |
| H | 0.476900  | 2.785104  | 0.196156  |
| H | 3.978152  | 0.261824  | 0.080284  |
| C | -5.473797 | 2.531641  | 0.953688  |
| H | -5.718106 | 3.168224  | 0.101098  |
| H | -6.182220 | 2.634164  | 1.768485  |
| O | 2.802893  | 0.034750  | 1.771304  |
| O | 2.574931  | -2.021870 | -0.243152 |
| H | 0.625243  | -1.132336 | 1.047590  |
| C | 3.726712  | -0.771859 | 2.337729  |
| O | 4.642936  | -1.250849 | 1.722595  |
| C | 3.729511  | -2.356105 | -0.863289 |
| O | 4.298719  | -1.606681 | -1.611882 |
| C | 3.443012  | -0.972253 | 3.793121  |
| H | 3.348479  | -0.006478 | 4.287518  |
| H | 2.493161  | -1.497159 | 3.899906  |
| H | 4.241234  | -1.553918 | 4.242917  |
| C | 4.173794  | -3.730084 | -0.478324 |
| H | 3.334863  | -4.422943 | -0.504384 |
| H | 4.966181  | -4.057968 | -1.144077 |
| H | 4.547852  | -3.683791 | 0.545710  |
| H | 2.811169  | 2.381173  | 0.905089  |
| O | 2.913222  | 2.107930  | -1.141674 |
| C | 2.930264  | 3.426577  | -1.412237 |
| O | 2.531739  | 4.252916  | -0.632615 |
| C | 3.494356  | 3.697454  | -2.772410 |
| H | 2.859871  | 3.228050  | -3.524180 |
| H | 4.487694  | 3.257494  | -2.851681 |
| H | 3.540634  | 4.768791  | -2.939940 |
| C | -4.350510 | -2.382639 | -0.297552 |
| O | -3.778805 | -2.634862 | 0.723802  |
| C | -5.120870 | -3.329658 | -1.154392 |
| H | -5.268154 | -4.266090 | -0.625708 |
| H | -4.538190 | -3.500166 | -2.060795 |
| H | -6.075825 | -2.892226 | -1.439932 |

55

Energy: -1733.21764260

|   |           |           |           |
|---|-----------|-----------|-----------|
| C | -4.108116 | 0.945452  | 0.268491  |
| C | -3.538390 | -0.150644 | -0.321369 |
| C | -2.130259 | -0.219945 | -0.378833 |
| C | -1.359337 | 0.819366  | 0.163349  |
| C | -1.962630 | 1.934017  | 0.769128  |
| C | -3.329897 | 1.966468  | 0.798112  |
| C | -1.466569 | -1.375443 | -1.056558 |
| C | 0.114201  | 0.726587  | 0.100963  |
| C | 0.657693  | -0.678261 | 0.046283  |
| N | -0.131723 | -1.477670 | -0.875713 |
| C | 2.105933  | -0.697621 | -0.411582 |
| H | 2.168671  | -0.439862 | -1.471035 |
| C | 2.932637  | 0.301335  | 0.379048  |
| C | 2.411063  | 1.708544  | 0.126528  |
| C | 0.912751  | 1.793317  | 0.126660  |
| O | -2.072576 | -2.178145 | -1.755695 |
| O | -5.426351 | 1.240693  | 0.418054  |
| O | -4.378567 | -1.085303 | -0.877988 |
| H | -1.377725 | 2.721253  | 1.221202  |
| O | -4.146984 | 2.928172  | 1.301451  |
| H | 0.290460  | -2.323380 | -1.238136 |
| H | 0.499575  | 2.793884  | 0.146807  |
| H | 3.980935  | 0.241364  | 0.095273  |
| C | -5.452881 | 2.343288  | 1.331002  |
| H | -6.184738 | 3.071685  | 0.998606  |
| H | -5.656864 | 1.972010  | 2.337042  |
| O | 2.789311  | 0.048081  | 1.779022  |
| O | 2.562076  | -2.035713 | -0.207531 |
| H | 0.608727  | -1.111999 | 1.052959  |
| C | 3.700801  | -0.758847 | 2.364610  |
| O | 4.617568  | -1.254997 | 1.764053  |
| C | 3.719841  | -2.387916 | -0.811534 |
| O | 4.302505  | -1.653659 | -1.564786 |
| C | 3.402871  | -0.936313 | 3.820133  |
| H | 3.312849  | 0.037068  | 4.300251  |
| H | 2.447460  | -1.451227 | 3.925955  |
| H | 4.191914  | -1.518723 | 4.284902  |
| C | 4.148652  | -3.760218 | -0.403719 |
| H | 3.304057  | -4.446211 | -0.428286 |
| H | 4.944394  | -4.103891 | -1.057404 |
| H | 4.513542  | -3.703210 | 0.623066  |
| H | 2.824058  | 2.381656  | 0.878965  |
| O | 2.941663  | 2.077724  | -1.162537 |
| C | 2.971769  | 3.392114  | -1.451991 |
| O | 2.572139  | 4.232730  | -0.688368 |
| C | 3.551854  | 3.638880  | -2.810015 |
| H | 2.922801  | 3.161669  | -3.561417 |
| H | 4.543413  | 3.192073  | -2.871688 |
| H | 3.606352  | 4.707252  | -2.993258 |
| C | -4.380291 | -2.341606 | -0.340676 |
| O | -3.831617 | -2.598318 | 0.692147  |
| C | -5.149301 | -3.279921 | -1.208237 |
| H | -5.321148 | -4.211819 | -0.678950 |
| H | -4.552642 | -3.463137 | -2.102974 |
| H | -6.091739 | -2.828700 | -1.513239 |



# Template Molecule

## Ground State

25

Energy: -780.20298310

|   |           |           |           |
|---|-----------|-----------|-----------|
| C | -3.260375 | -0.046766 | -0.079939 |
| C | -2.480859 | 1.078274  | 0.084459  |
| C | -1.078665 | 0.879266  | 0.065019  |
| C | -0.525202 | -0.406863 | -0.077192 |
| C | -1.343631 | -1.525156 | -0.247725 |
| C | -2.701932 | -1.300964 | -0.238372 |
| C | -0.211029 | 2.060225  | 0.265809  |
| C | 0.946544  | -0.534960 | -0.015816 |
| C | 1.696641  | 0.686275  | -0.469047 |
| N | 1.108644  | 1.886691  | 0.116544  |
| C | 1.575063  | -1.630257 | 0.399864  |
| O | -0.686210 | 3.168752  | 0.567872  |
| O | -4.624335 | -0.127691 | -0.173432 |
| O | -3.059800 | 2.276641  | 0.241085  |
| H | -0.937144 | -2.515160 | -0.394127 |
| O | -3.701379 | -2.207939 | -0.426421 |
| H | 1.672473  | 2.723217  | 0.179046  |
| H | 1.035928  | -2.513133 | 0.718674  |
| H | -2.321497 | 2.914409  | 0.414015  |
| C | -4.897943 | -1.521502 | -0.043387 |
| H | -5.119337 | -1.752416 | 1.001810  |
| H | -5.706196 | -1.799762 | -0.711068 |
| H | 1.654705  | 0.755851  | -1.561778 |
| H | 2.739693  | 0.629272  | -0.167991 |
| H | 2.656504  | -1.670150 | 0.435626  |

## Excited State S1 N

25

|                |                |           |           |
|----------------|----------------|-----------|-----------|
| Energy TD-DFT: | -780.061902827 |           |           |
| C              | 1.762175       | 0.441522  | 0.040431  |
| C              | 0.611825       | 1.228359  | 0.079634  |
| C              | -0.627576      | 0.544303  | 0.086994  |
| C              | -0.673489      | -0.905393 | -0.025752 |
| C              | 0.552030       | -1.669312 | -0.083328 |
| C              | 1.710630       | -0.984577 | -0.046940 |
| C              | -1.805851      | 1.335828  | 0.003636  |
| C              | -1.936059      | -1.545803 | -0.013998 |
| C              | -3.148924      | -0.698732 | 0.305452  |
| N              | -2.990252      | 0.679830  | -0.123135 |
| C              | -2.133848      | -2.892982 | -0.186210 |
| O              | -1.772769      | 2.610849  | -0.015784 |
| O              | 3.029079       | 0.850033  | 0.050925  |
| O              | 0.680292       | 2.544703  | 0.104704  |
| H              | 0.543665       | -2.746990 | -0.136843 |
| O              | 2.991698       | -1.440777 | -0.033656 |
| H              | -3.808828      | 1.270731  | -0.080842 |
| H              | -1.328030      | -3.582284 | -0.395161 |
| H              | -0.319135      | 2.841538  | 0.063116  |
| C              | 3.837894       | -0.312711 | -0.196093 |
| H              | 4.202575       | -0.262050 | -1.222495 |
| H              | 4.642270       | -0.345351 | 0.532243  |
| H              | -3.322888      | -0.751780 | 1.389864  |
| H              | -4.027186      | -1.113641 | -0.186468 |
| H              | -3.133075      | -3.306612 | -0.134204 |

## Excited State S1 T

25

|                |                |           |           |
|----------------|----------------|-----------|-----------|
| Energy TD-DFT: | -780.069800453 |           |           |
| C              | -1.774582      | 0.429509  | -0.059569 |
| C              | -0.639284      | 1.269921  | -0.043618 |
| C              | 0.640705       | 0.552451  | -0.049039 |
| C              | 0.680519       | -0.866850 | -0.010899 |
| C              | -0.531991      | -1.654737 | -0.032770 |
| C              | -1.705903      | -0.988870 | -0.052550 |
| C              | 1.819403       | 1.291410  | 0.102826  |
| C              | 1.970064       | -1.522013 | 0.008811  |
| C              | 3.143232       | -0.654326 | -0.391066 |
| N              | 3.018261       | 0.667852  | 0.208440  |
| C              | 2.163916       | -2.825295 | 0.292937  |
| O              | 1.852005       | 2.620339  | 0.225313  |
| O              | -3.053028      | 0.819182  | -0.101616 |
| O              | -0.703865      | 2.529943  | -0.018962 |
| H              | -0.496169      | -2.732909 | -0.062384 |
| O              | -2.977917      | -1.470455 | -0.144146 |
| H              | 3.823806       | 1.275147  | 0.145359  |
| H              | 1.353983       | -3.493903 | 0.550984  |
| H              | 0.905220       | 2.920243  | 0.167521  |
| C              | -3.841410      | -0.366145 | 0.088238  |
| H              | -4.196898      | -0.380152 | 1.119612  |
| H              | -4.652632      | -0.374371 | -0.632648 |
| H              | 3.163302       | -0.574800 | -1.486687 |
| H              | 4.078249       | -1.100174 | -0.061841 |
| H              | 3.161393       | -3.246010 | 0.284236  |

## Excited State S1 N + MeOH

31

Energy: -895.790595008

|   |           |           |           |
|---|-----------|-----------|-----------|
| C | -1.859777 | 0.407962  | 0.031805  |
| C | -0.848927 | 1.310817  | 0.350408  |
| C | 0.478818  | 0.820537  | 0.320093  |
| C | 0.736344  | -0.585520 | 0.035720  |
| C | -0.352236 | -1.478761 | -0.273836 |
| C | -1.596856 | -0.964991 | -0.268879 |
| C | 1.514200  | 1.687603  | 0.754789  |
| C | 2.081238  | -1.033357 | 0.004937  |
| C | 3.169751  | 0.015470  | 0.066915  |
| N | 2.772899  | 1.180894  | 0.834917  |
| C | 2.468114  | -2.337537 | -0.159222 |
| O | 1.283917  | 2.896937  | 1.123106  |
| O | -3.167159 | 0.643015  | -0.029983 |
| O | -1.134879 | 2.561822  | 0.667896  |
| H | -0.178544 | -2.514866 | -0.519613 |
| O | -2.784148 | -1.552675 | -0.570860 |
| H | 3.494776  | 1.859185  | 1.055275  |
| H | 1.764343  | -3.155048 | -0.227670 |
| H | -0.230080 | 2.972694  | 0.915994  |
| C | -3.807904 | -0.627396 | -0.238177 |
| H | -4.291525 | -0.921697 | 0.693384  |
| H | -4.508292 | -0.537805 | -1.063034 |
| H | 3.424587  | 0.299274  | -0.964823 |
| H | 4.065049  | -0.407196 | 0.519448  |
| H | 3.519926  | -2.590272 | -0.204784 |
| H | 2.819658  | 3.840947  | 1.183648  |
| O | 3.757690  | 4.034865  | 0.995099  |
| C | 3.865784  | 4.219989  | -0.406810 |
| H | 3.323769  | 5.108811  | -0.740093 |
| H | 4.919927  | 4.345584  | -0.648299 |
| H | 3.483985  | 3.353584  | -0.958178 |

## Excited State S1 T + MeOH

31

Energy: -895.795519027

|   |           |           |           |
|---|-----------|-----------|-----------|
| C | -1.845947 | 0.402202  | -0.055974 |
| C | -0.880017 | 1.347680  | 0.353850  |
| C | 0.492004  | 0.833142  | 0.376118  |
| C | 0.767336  | -0.522722 | 0.058883  |
| C | -0.279193 | -1.425709 | -0.362458 |
| C | -1.538099 | -0.940603 | -0.403227 |
| C | 1.501517  | 1.650545  | 0.896008  |
| C | 2.139082  | -0.979382 | 0.131085  |
| C | 3.182656  | 0.115317  | 0.146888  |
| N | 2.772250  | 1.197722  | 1.032962  |
| C | 2.515747  | -2.272495 | 0.126411  |
| O | 1.273350  | 2.888181  | 1.362349  |
| O | -3.155283 | 0.618507  | -0.207262 |
| O | -1.159018 | 2.534123  | 0.685896  |
| H | -0.055288 | -2.437755 | -0.663203 |
| O | -2.687601 | -1.538572 | -0.824269 |
| H | 3.461162  | 1.925528  | 1.203409  |
| H | 1.805455  | -3.087167 | 0.085235  |
| H | 0.297944  | 3.055158  | 1.217218  |
| C | -3.749654 | -0.661429 | -0.475784 |
| H | -4.239449 | -1.009845 | 0.434447  |
| H | -4.437805 | -0.566081 | -1.309703 |
| H | 3.307614  | 0.492738  | -0.878374 |
| H | 4.139054  | -0.272463 | 0.487899  |
| H | 3.563736  | -2.538804 | 0.180872  |
| H | 2.949616  | 4.063339  | 1.233617  |
| O | 3.833772  | 3.979128  | 0.851970  |
| C | 3.685321  | 3.993892  | -0.562112 |
| H | 3.321141  | 4.960383  | -0.916521 |
| H | 4.665976  | 3.807345  | -0.995097 |
| H | 2.996681  | 3.212912  | -0.901491 |
